# Supplementary material
Source: publisher figshare collection journal article supplement (https://acs.figshare.com/ndownloader/files/4260115)

**Supporting Information for**  
**Nickel-Catalyzed Formation of Cyclopentenone Derivatives via the Unique**  
**Cycloaddition of  $\alpha,\beta$ -Unsaturated Phenylesters with Alkynes**

**Masato Ohashi,<sup>\*,†,‡</sup> Tomoaki Taniguchi,<sup>†</sup> and Sensuke Ogoshi<sup>\*,†</sup>**

*Department of Applied Chemistry, Graduate School of Engineering, Osaka University, Suita, Osaka 565-0871, Japan, and*

*Center for Atomic and Molecular Technologies, Osaka University, Suita, Osaka 565-0871, Japan,*

**Experimental Section**

**General:** All manipulations were conducted under a nitrogen atmosphere using standard Schlenk or dry box techniques.  $^1\text{H}$ ,  $^{31}\text{P}$ , and  $^{13}\text{C}$  nuclear magnetic resonance spectra were recorded on Bruker Avance III 400 and Varian Unity Inova 600 spectrometers. The chemical shifts in  $^1\text{H}$  NMR spectra were recorded relative to either  $\text{Me}_4\text{Si}$  or residual protiated solvent ( $\text{C}_6\text{D}_5\text{H}$  ( $\delta$  7.16),  $\text{CHCl}_3$  ( $\delta$  7.27), or toluene- $d_7$  ( $\delta$  2.09)). The chemical shifts in the  $^{13}\text{C}$  NMR spectra were recorded relative to  $\text{Me}_4\text{Si}$ . The chemical shifts in the  $^{31}\text{P}$  NMR spectra were recorded using 85%  $\text{H}_3\text{PO}_4$  as external standard. Elemental analyses were performed at Instrumental Analysis Center, Faculty of Engineering, Osaka University. X-ray crystal data were collected by a Rigaku RAXIS-RAPID Imaging Plate diffractometer.

**Materials:** The degassed and distilled solvents (toluene and hexane) used in this work were commercially available. THF,  $\text{C}_6\text{D}_6$ , and toluene- $d_8$  were distilled from sodium benzophenone ketyl.  $i\text{PrOH}$  was distilled from sodium.  $i\text{PrOD}$  (>98% D) was purchased from Merck and used as received. All commercially available reagents were distilled and degassed prior to use.

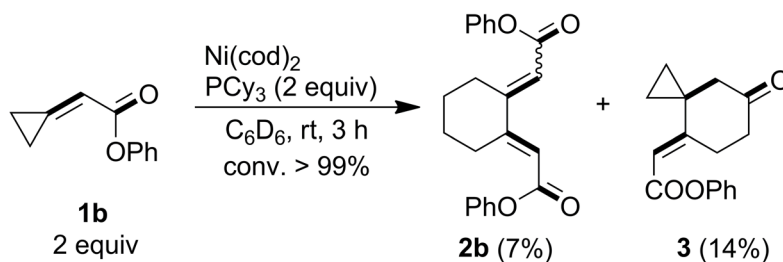

**Stoichiometric reaction of 1b with  $\text{Ni(cod)}_2$  in the presence of  $\text{PCy}_3$ :** To a  $\text{C}_6\text{D}_6$  solution of  $\text{Ni(cod)}_2$  (11.1 mg, 0.04 mmol) and  $\text{PCy}_3$  (22.7 mg, 0.08 mmol) was added a  $\text{C}_6\text{D}_6$  solution of **1b** (17.6 mg, 0.10 mmol), resulting in change of the color from orange to dark brown. The reaction mixture was stirred for 3 h at ambient temperature, and then insoluble was filtered to remove by passing through a pad of celite. The filtrate was concentrated *in vacuo* to give brown residue. NMR analysis using 2-methoxynaphthalene as internal standard revealed the formation of **2b** and **3** in 7% and 14% yield, respectively. Isolation of the products was conducted with 0.20 mmol of **1b**, and purification of the crude product by HPLC gave **2b** and **3** in 4 mg and 13 mg yield, respectively.

Spectral data of **3**:  $^1\text{H}$  NMR (400 MHz,  $\text{C}_6\text{D}_6$ , rt):  $\delta$  0.14 (dd,  $J = 4.4, 6.4$  Hz, 2H,  $\text{CH}_2$  of  $\text{C}^3$ -ring), 0.42 (dd,  $J = 4.4, 6.4$  Hz, 2H,  $\text{CH}_2$  of  $\text{C}^3$ -ring), 1.81 (s, 2H,  $-\text{COCH}_2\text{C}-$ ), 2.11 (t,  $J = 6.8$  Hz, 2H,  $-\text{CH}_2\text{CH}_2\text{CO}-$ ), 3.09 (m, 2H,  $-\text{CH}_2\text{CH}_2\text{CO}-$ ), 5.55 (s, 1H,  $=\text{CHCO}_2\text{Ph}$ ), 6.94 (t,  $J = 7.2$  Hz, 1H,  $-\text{Ph}$ ), 7.10 (t,  $J = 8.0$  Hz, 2H,  $-\text{Ph}$ ), 7.18 (m, 2H,  $-\text{Ph}$ ).  $^{13}\text{C}$  NMR (100 MHz,  $\text{C}_6\text{D}_6$ , rt):  $\delta$  15.8 ( $\text{C}^3$ ), 22.8 ( $\text{C}^3$ ), 27.0 ( $-\text{CH}_2\text{CH}_2\text{CO}$ ), 37.9 ( $-\text{CH}_2\text{CH}_2\text{CO}$ ), 47.4 ( $-\text{COCH}_2\text{C}-$ ), 110.0 ( $-\text{C}=\text{CHCO}_2\text{Ph}$ ), 122.1 ( $-\text{Ph}$ ), 125.7 ( $-\text{Ph}$ ), 129.6 ( $-\text{Ph}$ ), 151.4 (*ipso-Ph*), 164.5 ( $-\text{CO}_2\text{Ph}$ ), 165.8 ( $-\text{C}=\text{CHCO}_2\text{Ph}$ ), 207.1 ( $-\text{CO}$ ). HRMS (CI) Calcd for  $\text{C}_{16}\text{H}_{17}\text{O}_3$  257.1178 (M + H), Found  $m/z$  257.1180.

Spectral data for **2b**:  $^1\text{H}$  NMR (400 MHz,  $\text{C}_6\text{D}_6$ , rt):  $\delta$  1.21 (br s, 4H,  $-\text{CH}_2\text{CH}_2\text{C}-$ ), 2.96 (br s, 4H,  $-\text{CH}_2\text{CH}_2\text{C}-$ ), 6.01 (s, 2H,  $\text{C}=\text{CH}-$ ), 6.94 (t,  $J = 7.2$  Hz, 2H,  $-\text{OPh}$ ), 7.00-7.16 (m, 8H,  $-\text{OPh}$ ).  $^{13}\text{C}$  NMR (100 MHz,  $\text{C}_6\text{D}_6$ , rt):  $\delta$  25.6 ( $\text{CH}_2\text{CH}_2\text{C}$ ), 30.4 ( $\text{CH}_2\text{CH}_2\text{C}$ ), 114.9 ( $-\text{C}=\text{CH}-$ ), 122.0 ( $-\text{OPh}$ ), 125.8 ( $-\text{OPh}$ ), 129.6 ( $-\text{OPh}$ ), 151.3 (*ipso-Ph*), 162.5 ( $-\text{C}=\text{CH}-$ ), 164.0 ( $-\text{CO}$ ). HRMS (CI) Calcd for  $\text{C}_{22}\text{H}_{21}\text{O}_4$  349.1440 (M + H), Found  $m/z$  349.1443.

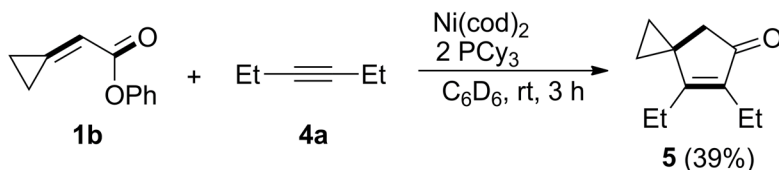

**Stoichiometric reaction of 1b with 4a in the presence of  $\text{Ni(cod)}_2$  and  $\text{PCy}_3$ :** To a  $\text{C}_6\text{D}_6$  solution of  $\text{Ni(cod)}_2$  (11.1 mg, 0.04 mmol) and  $\text{PCy}_3$  (21.8 mg, 0.08 mmol) was added a  $\text{C}_6\text{D}_6$  solution of **1b** (25.0

mg, 0.12 mmol), resulting in change of the color from orange to dark brown. Then, 3-hexyne (**4a**, 3.3 mg, 0.04 mmol) was added to the solution, and the reaction mixture was transferred into a J-Young NMR tube. Monitoring of the reaction by NMR spectroscopy demonstrated that all of **1b** were consumed after 3 hours. The yield of **5** (3.4 mg, 52%) was determined by GC analysis using tetradecane as an internal standard. Following the aforementioned procedure, isolation of **5** was conducted with 0.20 mmol of Ni(cod)<sub>2</sub>. After the reaction mixture was stirred for 3 h at room temperature, insoluble was filtered to remove by passing through a pad of silica, and then the filtrate was concentrated *in vacuo*. To the residue was added 1.0 M aqueous sodium hydroxide (30 mL). The organic layer was extracted with diethyl ether (20 mL x 3). The combined organic layer was dried over magnesium sulfate, filtered and concentrated *in vacuo*. Further purification by silica gel chromatography (hexane/ethyl acetate = 98/2) afforded **5** as colorless oil (13.8 mg, 39%).

<sup>1</sup>H NMR (400 MHz, CDCl<sub>3</sub>, rt): δ 0.94 (m, 2H, -CH<sub>2</sub> of C<sup>3</sup>-ring), 1.02-1.08 (m, 8H, -CH<sub>2</sub> of C<sup>3</sup>-ring and two -CH<sub>3</sub> groups), 1.98 (q, *J* = 7.6 Hz, 2H, -CH<sub>2</sub>CH<sub>3</sub>), 2.21 (q, *J* = 7.6 Hz, 2H, -CH<sub>2</sub>CH<sub>3</sub>), 2.43 (s, 2H, -CH<sub>2</sub>-). <sup>13</sup>C NMR (100 MHz, CDCl<sub>3</sub>, rt): δ 12.1 (-CH<sub>2</sub> of C<sup>3</sup>-ring), 13.2 (-CH<sub>2</sub>CH<sub>3</sub>), 13.8 (-CH<sub>2</sub>CH<sub>3</sub>), 17.1 (-CH<sub>2</sub>CH<sub>3</sub>), 18.1 (-CH<sub>2</sub>CH<sub>3</sub>), 24.7 (-CH<sub>2</sub>C-), 45.1(C<sup>3</sup>-ring), 141.5 (-C=C-C=O), 176.9 (-C=C-C=O), 208.1 (-C=C-C=O). HRMS (EI) Calcd for C<sub>11</sub>H<sub>16</sub>O 164.1201, Found *m/z* 164.1198.

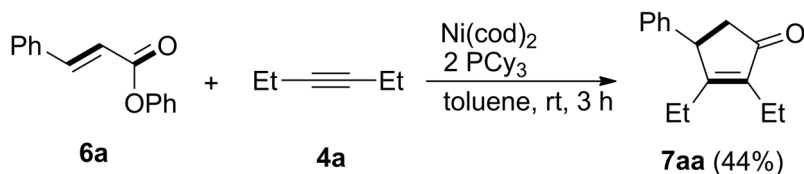

**Stoichiometric reaction of 6a with 4a in the presence of Ni(cod)<sub>2</sub> and PCy<sub>3</sub>:** To a C<sub>6</sub>D<sub>6</sub> solution of Ni(cod)<sub>2</sub> (11.6 mg, 0.04 mmol) and PCy<sub>3</sub> (21.8 mg, 0.08 mmol) was added a C<sub>6</sub>D<sub>6</sub> solution of **6a** (9.0 mg, 0.04 mmol), resulting in change of the color from orange to deep red. Then, **4a** (3.6 mg, 0.04 mmol) was added to the solution, and the reaction mixture was transferred into a J-Young NMR tube. Monitoring of the reaction by NMR spectroscopy demonstrated that all of **6a** were consumed after 3 hours. The yield of **7aa** (3.7 mg, 44%) was determined by GC analysis using tetradecane as an internal standard.

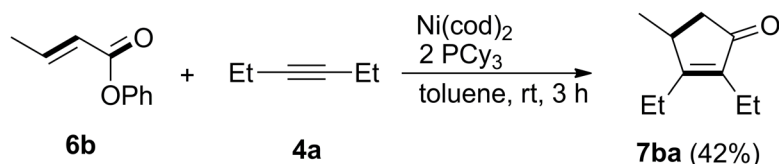

**Stoichiometric reaction of 6b with 4a in the presence of Ni(cod)<sub>2</sub> and PCy<sub>3</sub>:** To a C<sub>6</sub>D<sub>6</sub> solution of Ni(cod)<sub>2</sub> (11.6 mg, 0.04 mmol) and PCy<sub>3</sub> (21.8 mg, 0.08 mmol) was added a C<sub>6</sub>D<sub>6</sub> solution of **6b** (6.5 mg, 0.04 mmol), resulting in change of the color from orange to deep red. Then, **4a** (3.6 mg, 0.04 mmol) was added to the solution, and the reaction mixture was transferred into a J-Young NMR tube. Monitoring of the reaction by NMR spectroscopy demonstrated that all of **6b** were consumed after 3 hours. The yield of **7ba** (3.0 mg, 42%) was determined by GC analysis using tetradecane as an internal standard.

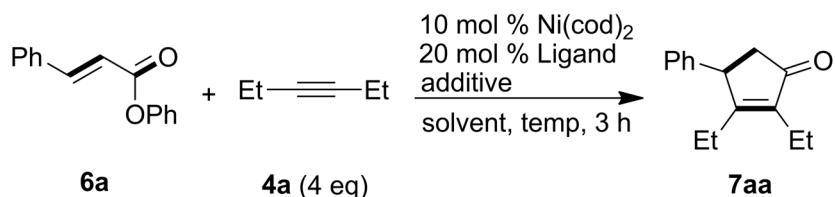

**Optimization for Ni(0)-catalyzed dephenoxylation [3 + 2] cycloaddition of 6a with 4a:** All catalytic reactions listed in Table 1, in which 0.10 mmol of **6a** (22.4 mg) was served in 5.0 mL of solvent, were conducted by using a pressure-tight test-tube. After the reaction mixture was thermostated at a given temperature for 3 hours, the yield of **7aa** was determined by GC analysis using tetradecane as an internal standard.

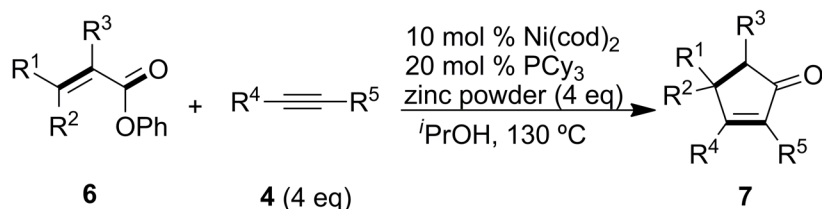

#### Ni(0)-Catalyzed Dephenoxylative Cycloaddition Reaction of 6 with 4:

All catalytic reactions listed in Table 2 were conducted by using a pressure-tight test-tube. Ni(cod)<sub>2</sub> (0.10 mmol), PCy<sub>3</sub> (0.20 mmol), Zn powder (4.0 mmol), and  $\alpha,\beta$ -Unsaturated Phenyl Ester **6** (1.0 mmol) were charged into the test-tube, and then 15.0 mL of *i*PrOH and alkyne **4** (4.0 mmol) were added to the mixture in this order. The test-tube was tightly sealed up and thermostated at 130 °C for 3 hours. After the reaction mixture was cooled down to room temperature, insoluble was filtered to remove by passing

through a pad of celite, and then the filtrate was concentrated *in vacuo*. The resulting crude product was further purified by the method hereinafter described separately.

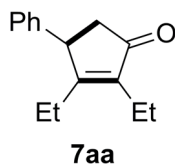

**Table 1, run 3, 2,3-diethyl-4-phenylcyclopenten-2-one (7aa):** The resulting crude product was further purified by passing through a pad of SiO<sub>2</sub> (eluent: hexane) followed by HPLC (eluent: CHCl<sub>3</sub>), yielding **7aa** as colorless oil (194.5 mg, 91%). <sup>1</sup>H NMR (400 MHz, CDCl<sub>3</sub>, rt): δ 0.99 (t, *J* = 7.6 Hz, 3H, 2-CH<sub>2</sub>CH<sub>3</sub>), 1.07 (t, *J* = 7.6 Hz, 3H, 3-CH<sub>2</sub>CH<sub>3</sub>), 1.99 (dq, *J* = 7.6, 7.6 Hz, 1H, 3-CHHCH<sub>3</sub>), 2.30 (q, *J* = 7.6 Hz, 2H, 2-CH<sub>2</sub>CH<sub>3</sub>), 2.33 (dd, *J* = 2.4, 18.8 Hz, 1H, -CHH-), 2.46 (dq, *J* = 7.6, 7.6 Hz, 1H, 3-CHHCH<sub>3</sub>), 2.88 (dd, *J* = 6.8, 18.8 Hz, 1H, -CHH-), 3.96 (d, *J* = 6.8 Hz, 1H, -CH<sub>2</sub>C(Ph)H-), 7.07 (d, *J* = 6.8 Hz, 2H, *o*-Ph), 7.20 (t, *J* = 6.8 Hz, 1H, *p*-Ph), 7.28 (t, *J* = 6.8 Hz, 2H, *m*-Ph). <sup>13</sup>C{<sup>1</sup>H} NMR (100 MHz, CDCl<sub>3</sub>, rt): δ 12.1 (-CH<sub>2</sub>CH<sub>3</sub>), 13.5 (-CH<sub>2</sub>CH<sub>3</sub>), 16.5 (-CH<sub>2</sub>CH<sub>3</sub>), 22.1 (-CH<sub>2</sub>CH<sub>3</sub>), 44.9 (5-C), 46.2 (4-C), 127.0 (-Ph), 127.4 (-Ph), 128.9 (-Ph), 142.2 (-Ph), 142.2 (2-C), 176.1 (3-C), 209.1 (1-CO). HRMS (EI) Calcd for C<sub>15</sub>H<sub>18</sub>O 214.1358, Found *m/z* 214.1365.

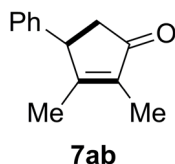

**Table 2, run 1, 2,3-dimethyl-4-phenylcyclopenten-2-one (7ab):** The resulting crude product was further purified by passing through a pad of SiO<sub>2</sub> (eluent: hexane) followed by HPLC (eluent: CHCl<sub>3</sub>), yielding **7ab** as colorless oil (156.5 mg, 84%). <sup>1</sup>H NMR (400 MHz, CDCl<sub>3</sub>, rt): δ 1.78 (dd, *J* = 0.8, 2.0 Hz, 3H, 2-CH<sub>3</sub>), 1.81 (s, 3H, 3-CH<sub>3</sub>), 2.35 (dd, *J* = 2.0, 19.2 Hz, 1H, -CHH-), 2.88 (dd, *J* = 6.8, 19.2 Hz, 1H, -CHH-), 3.81 (m, *J* = 6.8 Hz, 1H, -CH<sub>2</sub>C(Ph)H-), 7.08 (d, *J* = 7.2 Hz, 2H, *o*-Ph), 7.24 (t, *J* = 7.2 Hz, 1H, *p*-Ph), 7.33 (t, *J* = 7.2 Hz, 2H, *m*-Ph). <sup>13</sup>C{<sup>1</sup>H} NMR (100 MHz, CDCl<sub>3</sub>, rt): δ 8.3 (-CH<sub>3</sub>), 15.6 (-CH<sub>3</sub>), 44.6 (5-C), 49.2 (4-C), 127.1 (-Ph), 127.4 (-Ph), 128.9 (-Ph), 137.1 (2-C), 142.1 (-Ph), 171.6 (3-C), 209.1 (1-CO). HRMS (EI) Calcd for C<sub>13</sub>H<sub>14</sub>O 186.1045, Found *m/z* 186.1037.

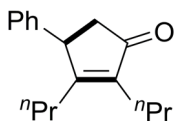

**7ac**

**Table 2, run 2, 4-phenyl-2,3-dipropylcyclopenten-2-one (7ac):** The resulting crude product was further purified by passing through a pad of SiO<sub>2</sub> (eluent: hexane) followed by HPLC (eluent: CHCl<sub>3</sub>), yielding **7ac** as colorless oil (160.0 mg, 66%). <sup>1</sup>H NMR (400 MHz, CDCl<sub>3</sub>, rt): δ 0.84 (t, *J* = 7.2 Hz, 3H, 2-CH<sub>2</sub>CH<sub>2</sub>CH<sub>3</sub>), 0.92 (t, *J* = 7.2 Hz, 3H, 3-CH<sub>2</sub>CH<sub>2</sub>CH<sub>3</sub>), 1.35 (m, 1H, 3-CH<sub>2</sub>CHHCH<sub>3</sub>), 1.50 (dt, *J* = 7.2, 7.2 Hz, 2H, 2-CH<sub>2</sub>CH<sub>2</sub>CH<sub>3</sub>), 1.48-1.56 (m, 1H, 3-CH<sub>2</sub>CHHCH<sub>3</sub>), 1.94 (ddd, *J* = 5.2, 9.2, 14.0 Hz, 1H, 3-CHHCH<sub>2</sub>CH<sub>3</sub>), 2.18-2.31, (m, 2H, 2-CH<sub>2</sub>CH<sub>2</sub>CH<sub>3</sub>), 2.32 (dd, *J* = 2.0, 18.8 Hz, 1H, -CHH-), 2.39 (ddd, *J* = 7.2, 9.2, 14.9 Hz, 1H, 3-CHHCH<sub>2</sub>CH<sub>3</sub>), 2.88 (dd, *J* = 7.2, 18.8 Hz, 1H, -CHH-), 3.91 (m, *J* = 7.2 Hz, 1H, -CH<sub>2</sub>CH-), 7.06 (d, *J* = 6.8 Hz, 2H, *o*-Ph), 7.20 (t, *J* = 6.8 Hz, 1H, *p*-Ph), 7.28 (t, *J* = 6.8 Hz, 2H, *m*-Ph). <sup>13</sup>C{<sup>1</sup>H} NMR (100 MHz, CDCl<sub>3</sub>, rt): δ 14.2 (-CH<sub>2</sub>CH<sub>2</sub>CH<sub>3</sub>), 14.2 (-CH<sub>2</sub>CH<sub>2</sub>CH<sub>3</sub>), 20.8 (-CH<sub>2</sub>CH<sub>2</sub>CH<sub>3</sub>), 22.0 (-CH<sub>2</sub>CH<sub>2</sub>CH<sub>3</sub>), 25.3 (-CH<sub>2</sub>CH<sub>2</sub>CH<sub>3</sub>), 31.0 (-CH<sub>2</sub>CH<sub>2</sub>CH<sub>3</sub>), 44.9 (5-C), 46.5 (4-C), 127.0 (-Ph), 127.3 (-Ph), 128.9 (-Ph), 141.4 (-Ph), 142.4 (2-C), 175.3 (3-C), 209.2 (1-CO). HRMS (EI) Calcd for C<sub>17</sub>H<sub>22</sub>O 242.1671, Found *m/z* .242.1672.

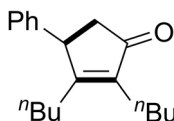

**7ad**

**Table 2, run 3, 2,3-dibutyl-4-phenylcyclopenten-2-one (7ad):** An authentic sample was prepared by using a stoichiometric amount of Ni(cod)<sub>2</sub> (0.20 mmol). To the resulting crude product was added NaOHaq (1.0 M, 50 mL), and then the organic layer was extracted with diethyl ether (50 mL x 3). The combined organic layer was dried over magnesium sulfate, filtered and concentrated *in vacuo*. Further purification by silica gel chromatography (eluent: hexane/AcOEt = 95/5) gave **7ad** as colorless oil (55.4 mg, 98%). <sup>1</sup>H NMR (400 MHz, CDCl<sub>3</sub>, rt): δ 0.77 (t, *J* = 6.8 Hz, 3H, 2-(CH<sub>2</sub>)<sub>3</sub>CH<sub>3</sub>), 0.87 (t, *J* = 6.8 Hz, 3H, 3-(CH<sub>2</sub>)<sub>3</sub>CH<sub>3</sub>), 1.12-1.38 (m, 8H, -CH<sub>2</sub>- x 4), 1.88 (m, 1H, 3-CHH(CH<sub>2</sub>)<sub>2</sub>CH<sub>3</sub>), 2.17 (m, 2H, 2-CH<sub>2</sub>(CH<sub>2</sub>)<sub>2</sub>CH<sub>3</sub>), 2.25 (dd, *J* = 1.6, 18.8 Hz, 1H, -CHH-), 2.33 (m, 1H, 3-CHH(CH<sub>2</sub>)<sub>2</sub>CH<sub>3</sub>), 2.79 (dd, *J* = 6.8, 18.8 Hz, 1H, -CHH-), 3.85 (d, *J* = 6.8 Hz, 1H, -CH<sub>2</sub>C(Ph)H-), 7.01 (d, *J* = 7.2 Hz, 2H, *o*-Ph), 7.19 (m, 1H, *p*-Ph), 7.24 (t, *J* = 7.2 Hz, 2H, *m*-Ph). <sup>13</sup>C{<sup>1</sup>H} NMR (100 MHz, CDCl<sub>3</sub>, rt): δ 13.9 (-CH<sub>3</sub>), 14.1 (-CH<sub>3</sub>), 22.8 (-CH<sub>2</sub>-), 22.9 (-CH<sub>2</sub>-), 23.2 (-CH<sub>2</sub>-), 28.7 (-CH<sub>2</sub>-), 29.6 (-CH<sub>2</sub>-), 31.0 (-CH<sub>2</sub>-), 44.9 (5-C), 46.5 (4-C), 127.0 (-Ph), 127.4 (-Ph), 128.5 (-Ph), 141.4 (-Ph), 142.4 (2-C), 175.4 (3-C), 209.3 (1-CO). HRMS (EI) Calcd for C<sub>19</sub>H<sub>26</sub>O 270.1984, Found *m/z* 270.1982.

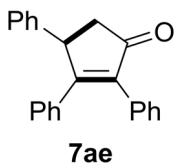

**Table 2, run 4, 2,3,4-triphenylcyclopenten-2-one (7ae):** To the resulting crude product was added NaOHaq (1.0 M, 50 mL), and then the organic layer was extracted with diethyl ether (50 mL x 3). The combined organic layer was dried over magnesium sulfate, filtered and concentrated *in vacuo*. Recrystallization of the residue from hexane at -15 °C gave **7ae** as white microcrystalline (198.2 mg, 64%). <sup>1</sup>H NMR (400 MHz, CDCl<sub>3</sub>, rt): δ 2.62 (dd, *J* = 2.0, 18.8 Hz, 1H, -CHH-), 3.23 (dd, *J* = 7.2, 18.8 Hz, 1H, -CHH-), 4.57 (dd, *J* = 2.0, 7.2 Hz, 1H, -CH<sub>2</sub>C(Ph)H-), 7.03-7.29 (m, 15H, *Ph*). <sup>13</sup>C{<sup>1</sup>H} NMR (100 MHz, CDCl<sub>3</sub>, rt): δ 46.0 (5-C), 47.2 (4-C), 126.9 (-*Ph*), 127.4 (-*Ph*), 128.0 (-*Ph*), 128.2 (-*Ph*), 128.4 (-*Ph*), 128.7 (-*Ph*), 128.9 (-*Ph*), 129.2 (-*Ph*), 129.6 (-*Ph*), 131.8 (*ipso-Ph*), 134.8 (*ipso-Ph*), 140.8 (*ipso-Ph*), 142.2 (2-C), 177.0 (3-C), 207.5 (1-CO). HRMS (EI) Calcd for C<sub>23</sub>H<sub>18</sub>O 310.1358, Found *m/z* 310.1352.

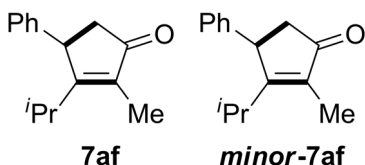

**Table 2, run 5, 3-isopropyl-2-methyl-4-phenylcyclopenten-2-one (7af):** To the resulting crude product was added NaOHaq (1.0 M, 50 mL), and then the organic layer was extracted with diethyl ether (50 mL x 3). The combined organic layer was dried over magnesium sulfate, filtered and concentrated *in vacuo*. Further purification by silica gel chromatography (eluent: hexane/AcOEt = 95/5) gave **7af** as colorless oil (97.9 mg, 46%,) and its regioisomer as colorless oil (52.3 mg, 24%). <sup>1</sup>H NMR (400 MHz, CDCl<sub>3</sub>, rt): δ 0.79 (d, *J* = 6.0 Hz, 3H, -CH(CH<sub>3</sub>)<sub>2</sub>), 1.06 (d, *J* = 6.0 Hz, 3H, -CH(CH<sub>3</sub>)<sub>2</sub>), 1.82 (s, 3H, -CH<sub>3</sub>), 2.29 (d, *J* = 18.8 Hz, 1H, -CHH-), 2.77 (m, 1H, -CH(CH<sub>3</sub>)<sub>2</sub>), 2.85 (dd, *J* = 6.8, 18.8 Hz, 1H, -CHH-), 3.96 (m, 1H, -CH<sub>2</sub>C(Ph)H-), 7.10 (d, *J* = 6.8 Hz, 2H, *o-Ph*), 7.20-7.28 (m, 3H, *Ph*). <sup>13</sup>C{<sup>1</sup>H} NMR (100 MHz, CDCl<sub>3</sub>, rt): δ 8.4 (-CH(CH<sub>3</sub>)<sub>2</sub>), 19.8 (-CH<sub>3</sub>), 20.9 (-CH(CH<sub>3</sub>)<sub>2</sub>), 30.4 (-CH(CH<sub>3</sub>)<sub>2</sub>), 45.3 (5-C), 46.5 (4-C), 126.9 (-*Ph*), 127.6 (-*Ph*), 128.6 (-*Ph*), 136.0 (-*Ph*), 142.8 (2-C), 179.4 (3-C), 209.8 (1-CO). HRMS (EI) Calcd for C<sub>15</sub>H<sub>18</sub>O 214.1358, Found *m/z* 214.1360. Spectral data of the regioisomer of **7af**: <sup>1</sup>H NMR (400 MHz, CDCl<sub>3</sub>, rt): δ 1.15 (d, *J* = 7.2 Hz, 3H, -CH(CH<sub>3</sub>)<sub>2</sub>), 1.17 (d, *J* = 7.2 Hz, 3H, -CH(CH<sub>3</sub>)<sub>2</sub>), 1.75 (s, 3H, -CH<sub>3</sub>), 2.20 (dd, *J* = 2.0, 18.8 Hz, 1H, -CHH-), 2.76 (dd, *J* = 6.8, 18.8 Hz, 1H, -CHH-), 2.75 (m, 1H, -CH(CH<sub>3</sub>)<sub>2</sub>), 3.67 (d, *J* = 6.8 Hz, 1H, -CH<sub>2</sub>CH-), 7.00 (d, *J* = 7.2 Hz,

2H, *o*-Ph), 7.17 (m, 1H, *p*-Ph), 7.23 (t,  $J = 7.2$  Hz, 2H, *m*-Ph).  $^{13}\text{C}\{^1\text{H}\}$  NMR (100 MHz,  $\text{CDCl}_3$ , rt):  $\delta$  15.6 (-CH<sub>3</sub>), 20.1 (-CH(CH<sub>3</sub>)<sub>2</sub>), 20.4 (-CH(CH<sub>3</sub>)<sub>2</sub>), 25.0 (-CH(CH<sub>3</sub>)<sub>2</sub>), 44.9 (5-C), 48.9 (4-C), 126.9 (-Ph), 127.2 (-Ph), 128.9 (-Ph), 142.3 (2-C), 145.4 (-Ph), 170.3 (3-C), 208.5 (1-CO). HRMS (EI) Calcd for C<sub>15</sub>H<sub>18</sub>O 214.1358, Found  $m/z$  214.1355.

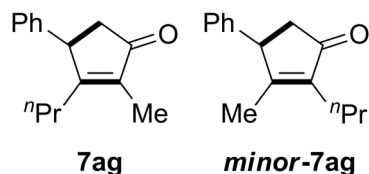

**Table 2, run 6, 2-methyl-4-phenyl-3-propylcyclopenten-2-one (7ag):** The resulting crude product was further purified by passing through a pad of SiO<sub>2</sub> (eluent: hexane) followed by HPLC (eluent:  $\text{CHCl}_3$ ), yielding a mixture of the isomers of **7ag** as yellow oil (111.3 mg, 52%, major/minor = 72/28). The ratio of products was determined by NMR analysis.  $^1\text{H}$  NMR (400 MHz,  $\text{CDCl}_3$ , rt):  $\delta$  0.77 (t,  $J = 7.2$  Hz, 3H, -CH<sub>2</sub>CH<sub>2</sub>CH<sub>3</sub>), 1.32-1.38 (m, 1H, -CH<sub>2</sub>CHHCH<sub>3</sub>), 1.45-1.52 (m, 1H, -CH<sub>2</sub>CHHCH<sub>3</sub>), 1.73 (d,  $J = 1.2$  Hz, 3H, -CH<sub>3</sub>), 1.90 (m, 1H, -CHHCH<sub>2</sub>CH<sub>3</sub>), 2.22 (m, 1H, -CHHCH<sub>2</sub>CH<sub>3</sub>), 2.23-2.37 (m, 1H, -CHH-), 2.85 (dd,  $J = 2.0, 18.8$  Hz, 1H, -CHH-), 3.84 (m,  $J = 7.2$  Hz, 1H, -CH<sub>2</sub>C(Ph)H-), 6.80 (d,  $J = 6.8$  Hz, 2H, *o*-Ph), 7.14-7.23 (m, 3H, Ph).  $^{13}\text{C}\{^1\text{H}\}$  NMR (100 MHz,  $\text{CDCl}_3$ , rt):  $\delta$  8.3 (-CH<sub>2</sub>CH<sub>2</sub>CH<sub>3</sub>), 14.1 (-CH<sub>3</sub>), 20.5 (-CH<sub>2</sub>CH<sub>2</sub>CH<sub>3</sub>), 31.1 (-CH<sub>2</sub>CH<sub>2</sub>CH<sub>3</sub>), 44.7 (5-C), 46.9 (4-C), 127.0 (-Ph), 127.3 (-Ph), 127.4 (-Ph), 128.9 (-Ph), 142.2 (2-C), 175.2 (3-C), 209.4 (1-CO). HRMS (EI) Calcd for C<sub>15</sub>H<sub>18</sub>O 214.1358, Found  $m/z$  214.1358. Spectral data of minor product:  $^1\text{H}$  NMR (400 MHz,  $\text{CDCl}_3$ , rt):  $\delta$  0.83 (t,  $J = 7.2$  Hz, 3H, -CH<sub>2</sub>CH<sub>2</sub>CH<sub>3</sub>), 1.38 (m, 2H, -CH<sub>2</sub>CH<sub>2</sub>CH<sub>3</sub>), 1.74 (s, 3H, -CH<sub>3</sub>), 2.18 (m, 2H, -CH<sub>2</sub>CH<sub>2</sub>CH<sub>3</sub>), 2.23-2.37 (m, 1H, -CHH-), 2.85-2.93 (m, 1H, -CHH-), 3.60 (m,  $J = 7.2$  Hz, 1H, -CH<sub>2</sub>C(Ph)H-), 7.04 (d,  $J = 6.8$  Hz, 2H, *o*-Ph), 7.18-7.29 (m, 3H, Ph).  $^{13}\text{C}\{^1\text{H}\}$  NMR (100 MHz,  $\text{CDCl}_3$ , rt):  $\delta$  14.0 (-CH<sub>2</sub>CH<sub>2</sub>CH<sub>3</sub>), 15.5 (-CH<sub>3</sub>), 21.7 (-CH<sub>2</sub>CH<sub>2</sub>CH<sub>3</sub>), 25.2 (-CH<sub>2</sub>CH<sub>2</sub>CH<sub>3</sub>), 44.7 (5-C), 49.1 (4-C), 127.0 (-Ph), 127.0 (-Ph), 128.9 (-Ph), 137.2 (-Ph), 141.3 (2-C), 171.9 (3-C), 208.9 (1-CO).

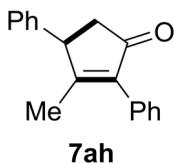

**Table 2, run 7, 3-methyl-2,4-diphenylcyclopenten-2-one (7ah):** Monitoring of the crude product by GC revealed the formation of the cycloaddition product as a mixture of regioisomers mixture (major/minor = 97/3). The resulting crude product was further purified by passing through a pad of SiO<sub>2</sub> (eluent: hexane) followed by HPLC (eluent: CHCl<sub>3</sub>), yielding the major regioisomer **7ah** as colorless oil (159.7 mg, 64%). <sup>1</sup>H NMR (400 MHz, CDCl<sub>3</sub>, rt): δ 1.93 (s, 3H, -CH<sub>3</sub>), 2.52 (dd, *J* = 2.0, 19.2 Hz, 1H, -CHH-), 3.03 (dd, *J* = 7.2, 19.2 Hz, 1H, -CHH-), 3.92 (br d, *J* = 7.2 Hz, 1H, -CH<sub>2</sub>C(Ph)H), 7.13 (d, *J* = 7.2 Hz, 2H, *Ph*), 7.14-7.40 (m, 8H, *Ph*). <sup>13</sup>C{<sup>1</sup>H} NMR (100 MHz, CDCl<sub>3</sub>, rt): δ 16.8 (-CH<sub>3</sub>), 45.1 (5-C), 49.2 (4-C), 127.3 (-*Ph*), 127.5 (-*Ph*), 127.9 (-*Ph*), 128.4 (-*Ph*), 129.2 (-*Ph*), 129.3 (-*Ph*), 131.7 (-*Ph*), 140.8 (-*Ph*), 141.9 (2-C), 173.3 (3-C), 206.8 (1-CO). HRMS (EI) Calcd for C<sub>18</sub>H<sub>16</sub>O 248.1201, Found *m/z* 248.1197.

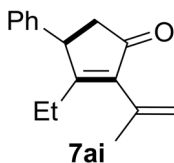

**Table 2, Entry 8, 3-ethyl-4-phenyl-2-(1-propen-2-yl)cyclopenten-2-one (7ai):** Monitoring of the crude product by GC revealed the formation of the cycloaddition product as a mixture of regioisomers mixture (major/minor = >99/1). To the resulting crude product was added NaOHaq (1.0 M, 50 mL), and then the organic layer was extracted with diethyl ether (50 mL x 3). The combined organic layer was dried over magnesium sulfate, filtered and concentrated *in vacuo*. Further purification by silica gel chromatography (eluent: hexane/AcOEt = 95/5) gave the major regioisomer **7ai** as colorless oil (43.0 mg, 19%). <sup>1</sup>H NMR (400 MHz, CDCl<sub>3</sub>, rt): δ 1.18 (t, *J* = 7.6 Hz, 3H, -CH<sub>3</sub>), 2.17 (dq, 1H, 3-CHHCH<sub>3</sub>), 2.17 (s, 3H, -CH<sub>3</sub>), 2.57 (dd, *J* = 2.0, 18.8 Hz, 1H, -CHHC(Ph)H-), 2.75 (dq, *J* = 7.6, 14.0 Hz, 1H, 3-CHHCH<sub>3</sub>), 3.11 (dd, *J* = 6.8, 18.8 Hz, 1H, -CHHC(Ph)H-), 4.20 (br d, *J* = 6.8 Hz, 1H, -CH<sub>2</sub>C(Ph)H-), 5.05 (s, 1H, =CHH), 5.43 (s, 1H, =CHH), 7.30 (d, *J* = 6.8 Hz, 2H, -*Ph*), 7.45 (m, 1H, -*Ph*), 7.51 (m, 2H, -*Ph*). <sup>13</sup>C{<sup>1</sup>H} NMR (100 MHz, CDCl<sub>3</sub>, rt): δ 12.3 (-CH<sub>3</sub>), 22.5 (-CH<sub>3</sub>), 22.6 (-CH<sub>2</sub>CH<sub>3</sub>), 45.0 (5-C), 46.2 (4-C), 116.7 (-C=CH<sub>2</sub>), 127.1 (-*Ph*), 127.4 (-*Ph*), 129.0 (-*Ph*), 137.4 (2-C), 141.9 (-*Ph*), 143.3 (-C=CH<sub>2</sub>), 177.0 (3-C), 207.5 (1-CO). HRMS (EI) Calcd for C<sub>16</sub>H<sub>18</sub>O 226.1358, Found *m/z* 226.1361.

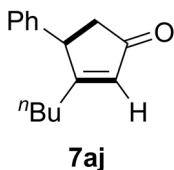

**Table 2, Entry 9, 3-butyl-4-phenylcyclopenten-2-one (7aj):** Monitoring of the crude product by GC revealed the formation of the cycloaddition product as a mixture of regioisomers mixture (42% yield, major/minor = 76/24). The resulting crude product was further purified by passing through a pad of SiO<sub>2</sub> (eluent: hexane) followed by HPLC (eluent: CHCl<sub>3</sub>), yielding the major regioisomer **7aj** as colorless oil (64.2 mg, 30%). <sup>1</sup>H NMR (400 MHz, CDCl<sub>3</sub>, rt): δ 0.79 (t, *J* = 7.2 Hz, 3H, -CH<sub>2</sub>CH<sub>2</sub>CH<sub>2</sub>CH<sub>3</sub>), 1.22 (m, 2H, -CH<sub>2</sub>CH<sub>2</sub>CH<sub>2</sub>CH<sub>3</sub>), 1.41 (m, 2H, -CH<sub>2</sub>CH<sub>2</sub>CH<sub>2</sub>CH<sub>3</sub>), 2.05 (m, 2H, -CH<sub>2</sub>CH<sub>2</sub>CH<sub>2</sub>CH<sub>3</sub>), 2.32 (d, *J* = 18.8 Hz, 1H, -CHHCH-), 2.84 (dd, *J* = 6.4, 18.8 Hz, 1H, -CHHCH-), 3.88 (m, *J* = 6.4 Hz, 1H, -CH<sub>2</sub>CH-), 6.02 (s, 1H, -CH=C-), 7.04 (m, *J* = 6.8 Hz, 2H, *o*-Ph), 7.17-7.24 (m, 3H, Ph). <sup>13</sup>C{<sup>1</sup>H} NMR (100 MHz, CDCl<sub>3</sub>, rt): δ 13.8 (-CH<sub>2</sub>CH<sub>2</sub>CH<sub>2</sub>CH<sub>3</sub>), 22.3 (-CH<sub>2</sub>CH<sub>2</sub>CH<sub>2</sub>CH<sub>3</sub>), 29.1 (-CH<sub>2</sub>CH<sub>2</sub>CH<sub>2</sub>CH<sub>3</sub>), 31.2 (-CH<sub>2</sub>CH<sub>2</sub>CH<sub>2</sub>CH<sub>3</sub>), 45.7 (-CH<sub>2</sub>CHPh), 49.6 (-CH<sub>2</sub>CHPh), 126.9 (-Ph), 127.2 (-Ph), 128.9 (-Ph), 129.8 (-C=C-CO), 141.5 (-Ph), 184.6 (-C=C-CO), 209.1 (-CO). C<sub>15</sub>H<sub>18</sub>O 214.1358, Found *m/z* 214.1355.

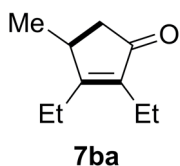

**Table 2, Entry 14, 2,3-diethyl-4-methylcyclopenten-2-one (7ba):** To the resulting crude product was added NaOH<sub>aq</sub> (1.0 M, 50 mL), and then the organic layer was extracted with diethyl ether (50 mL x 3). The combined organic layer was dried over magnesium sulfate, filtered and concentrated *in vacuo*. Further purification by silica gel chromatography (eluent: hexane/AcOEt = 95/5) gave **7ba** as colorless oil (260.0 mg, 86%). <sup>1</sup>H NMR (400 MHz, CDCl<sub>3</sub>, rt): δ 0.93 (t, *J* = 7.2 Hz, 3H, 2-CH<sub>2</sub>CH<sub>3</sub>), 1.05 (t, *J* = 7.2 Hz, 3H, 3-CH<sub>2</sub>CH<sub>3</sub>), 1.08 (d, *J* = 7.2 Hz, 3H, -CH<sub>3</sub>), 1.90 (dd, *J* = 2.0, 18.4 Hz, 1H, 3-CHHCH-), 2.09 (q, *J* = 7.2 Hz, 2H, 2-CH<sub>2</sub>CH<sub>3</sub>), 2.25 (m, 1H, 3-CHHCH<sub>3</sub>), 2.45 (m, 1H, -CHHCH<sub>3</sub>), 2.60 (dd, *J* = 7.2, 18.4 Hz, 1H, -CHH-), 2.81 (m, 1H, -CH<sub>2</sub>C(Me)H-). <sup>13</sup>C{<sup>1</sup>H} NMR (100 MHz, CDCl<sub>3</sub>, rt): δ 12.2 (-CH<sub>2</sub>CH<sub>3</sub>), 13.4 (-CH<sub>2</sub>CH<sub>3</sub>), 16.3 (-CH<sub>2</sub>CH<sub>3</sub>), 19.1 (-CH<sub>3</sub>), 21.4 (-CH<sub>2</sub>CH<sub>3</sub>), 34.4 (5-C), 43.2 (4-C), 140.1 (2-C), 178.5 (3-C), 209.0 (1-CO). HRMS (EI) Calcd for C<sub>10</sub>H<sub>16</sub>O 152.1201, Found *m/z* 152.1194.

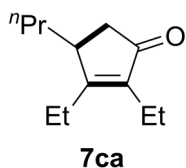

**Table 2, Entry 15, 2,3-diethyl-4-propylcyclopenten-2-one (7ca):** To the resulting crude product was added NaOHaq (1.0 M, 50 mL), and then the organic layer was extracted with diethyl ether (50 mL x 3). The combined organic layer was dried over magnesium sulfate, filtered and concentrated *in vacuo*. Further purification by silica gel chromatography (eluent: hexane/AcOEt = 95/5) gave **7ca** as colorless oil (141.2 mg, 79%).  $^1\text{H}$  NMR (400 MHz,  $\text{CDCl}_3$ , rt):  $\delta$  0.86 (t,  $J$  = 7.2 Hz, 3H, 2- $\text{CH}_2\text{CH}_3$ ), 0.86 (t,  $J$  = 7.6 Hz, 3H, 3- $\text{CH}_2\text{CH}_3$ ), 1.00 (t,  $J$  = 7.6 Hz, 3H, - $\text{CH}_2\text{CH}_2\text{CH}_3$ ), 1.00-1.09 (m, 1H, - $\text{CHHCH}_2\text{CH}_3$ ), 1.09-1.27 (m, 2H, - $\text{CH}_2\text{CH}_2\text{CH}_3$ ), 1.58-1.67 (m, 1H, - $\text{CHHCH}_2\text{CH}_3$ ), 1.93 (dd,  $J$  = 2.0, 18.4 Hz, 1H, - $\text{CHH}$ -), 2.04 (q,  $J$  = 7.6 Hz, 2H, 2- $\text{CH}_2\text{CH}_3$ ), 2.21 (m, 1H, 3- $\text{CHHCH}_3$ ), 2.40 (dd,  $J$  = 6.8, 18.8 Hz, 1H, - $\text{CHH}$ -), 2.48 (m, 1H, - $\text{CHHCH}_3$ ), 2.67 (m, 1H, - $\text{CH}_2\text{C}(\text{Pr})\text{H}$ -).  $^{13}\text{C}\{^1\text{H}\}$  NMR (100 MHz,  $\text{CDCl}_3$ , rt):  $\delta$  12.3 (- $\text{CH}_3$ ), 13.4 (- $\text{CH}_3$ ), 14.1 (- $\text{CH}_3$ ), 16.3 (- $\text{CH}_2$ -), 20.4 (- $\text{CH}_2\text{CH}_3$ ), 21.6 (- $\text{CH}_2\text{CH}_3$ ), 35.1 (- $\text{CH}_2\text{C}_2\text{H}_5$ ), 39.6 (5-C), 40.7 (4-C), 141.3 (2-C), 177.6 (3-C), 209.1 (1-CO). HRMS (EI) Calcd for  $\text{C}_{12}\text{H}_{20}\text{O}$ , 180.1514, Found  $m/z$  180.1514.

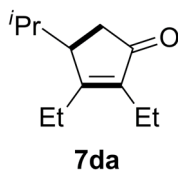

**Table 2, Entry 16, 2,3-diethyl-4-isopropylcyclopenten-2-one (7da):** To the resulting crude product was added NaOHaq (1.0 M, 50 mL), and then the organic layer was extracted with diethyl ether (50 mL x 3). The combined organic layer was dried over magnesium sulfate, filtered and concentrated *in vacuo*. Further purification by silica gel chromatography (eluent: hexane/AcOEt = 95/5) gave **7da** as colorless oil (151.3 mg, 84%).  $^1\text{H}$  NMR (400 MHz,  $\text{CDCl}_3$ , rt):  $\delta$  0.53 (d,  $J$  = 6.8 Hz, 3H, - $\text{CH}(\text{CH}_3)_2$ ), 0.91 (t,  $J$  = 7.6 Hz, 3H, 2- $\text{CH}_2\text{CH}_3$ ), 0.94 (d,  $J$  = 6.8 Hz, 3H, - $\text{CH}(\text{CH}_3)_2$ ), 1.06 (t,  $J$  = 7.6 Hz, 3H, 3- $\text{CH}_2\text{CH}_3$ ), 2.01-2.23, (m, 6H, 2- $\text{CH}_2\text{CH}_3$ , 3- $\text{CHHCH}_3$ , - $\text{CH}_2\text{CH}$ -, - $\text{CH}(\text{CH}_3)_2$ ), 2.49 (dq,  $J$  = 7.6, 15.2 Hz 1H, 3- $\text{CHHCH}_3$ ), 2.81 (m, 1H, - $\text{CH}_2\text{C}(\text{Pr})\text{H}$ -).  $^{13}\text{C}\{^1\text{H}\}$  NMR (100 MHz,  $\text{CDCl}_3$ , rt):  $\delta$  12.1 (- $\text{CH}_3$ ), 13.4 (- $\text{CH}_3$ ), 14.4 (- $\text{CH}(\text{CH}_3)_2$ ), 16.1 (- $\text{CH}(\text{CH}_3)_2$ ), 21.4 (- $\text{CH}_2\text{CH}_3$ ), 21.7 (- $\text{CH}_2\text{CH}_3$ ), 27.3 (- $\text{CH}(\text{CH}_3)_2$ ), 34.8 (5-C), 44.9 (4-C), 142.1 (2-C), 176.7 (3-C), 209.2 (1-CO). HRMS (EI) Calcd for  $\text{C}_{12}\text{H}_{20}\text{O}$  180.1514, Found  $m/z$  180.1514.

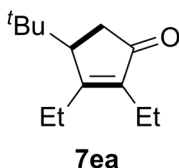

**Table 2, Entry 17, 2,3-diethyl-4-isopropylcyclopenten-2-one (7ea):** To the resulting crude product was added NaOHaq (1.0 M, 50 mL), and then the organic layer was extracted with diethyl ether (50 mL x 3). The combined organic layer was dried over magnesium sulfate, filtered and concentrated *in vacuo*. Further purification by silica gel chromatography (eluent: hexane/AcOEt = 95/5) gave **7ea** as colorless oil (110.6 mg, 57%). <sup>1</sup>H NMR (400 MHz, CDCl<sub>3</sub>, rt): δ 0.88 (s, 9H, -C(CH<sub>3</sub>)<sub>3</sub>), 0.90 (t, *J* = 7.6 Hz, 3H, 2-CH<sub>2</sub>CH<sub>3</sub>), 1.06 (t, *J* = 7.6 Hz, 3H, 3-CH<sub>2</sub>CH<sub>3</sub>), 2.13 (q, 2H, 2-CH<sub>2</sub>CH<sub>3</sub>), 2.17 (dd, *J* = 2.0, 18.8 Hz, 1H, -CHHCH-), 2.27 (dd, *J* = 6.4, 18.8 Hz, 1H, -CHHCH-), 2.38 (dq, *J* = 7.6, 11.6 Hz, 1H, 3-CHHCH<sub>3</sub>), 2.60 (dq, *J* = 7.6, 11.6 Hz, 1H, 3-CHHCH<sub>3</sub>), 2.66 (br d, *J* = 6.4 Hz, 1H, -CH<sub>2</sub>CH-). <sup>13</sup>C{<sup>1</sup>H} NMR (100 MHz, CDCl<sub>3</sub>, rt): δ 12.7 (-CH<sub>2</sub>CH<sub>3</sub>), 13.5 (-CH<sub>2</sub>CH<sub>3</sub>), 16.4 (-CH<sub>2</sub>CH<sub>3</sub>), 24.2 (-CH<sub>2</sub>CH<sub>3</sub>), 28.3 (-C(CH<sub>3</sub>)<sub>3</sub>), 34.4 (-C(CH<sub>3</sub>)<sub>3</sub>), 39.6 (5-C), 49.8 (4-C), 143.7 (2-C), 176.7 (3-C), 209.1 (1-CO). HRMS (EI) Calcd for C<sub>13</sub>H<sub>22</sub>O 194.1671, Found *m/z* 194.1669.

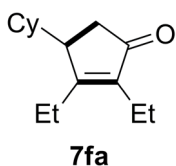

**Table 2, Entry 18, 4-cyclohexyl-2,3-diethylcyclopenten-2-one (7fa):** To the resulting crude product was added NaOHaq (1.0 M, 50 mL), and then the organic layer was extracted with diethyl ether (50 mL x 3). The combined organic layer was dried over magnesium sulfate, filtered and concentrated *in vacuo*. Further purification by silica gel chromatography (eluent: hexane/AcOEt = 95/5) gave **7fa** as colorless oil (113.9 mg, 49%). <sup>1</sup>H NMR (400 MHz, CDCl<sub>3</sub>, rt): δ 0.74 (m, 1H, -Cy), 0.92 (t, *J* = 7.6 Hz, 3H, 2-CH<sub>2</sub>CH<sub>3</sub>), 1.07 (t, *J* = 7.6 Hz, 3H, 3-CH<sub>2</sub>CH<sub>3</sub>), 1.00-1.28 (m, 5H, -Cy), 1.55-1.75 (m, 5H, -Cy), 2.09-2.25 (m, 5H, -CH<sub>2</sub>C(Cy)H-, 2-CH<sub>2</sub>CH<sub>3</sub>, 3-CHHCH<sub>3</sub>), 2.51 (dq, *J* = 7.6, 14.0 Hz 1H, 3-CHHCH<sub>3</sub>), 2.78 (m, 1H, -CH<sub>2</sub>C(Cy)H-). <sup>13</sup>C{<sup>1</sup>H} NMR (100 MHz, CDCl<sub>3</sub>, rt): δ 12.3 (-CH<sub>3</sub>), 13.5 (-CH<sub>3</sub>), 16.2 (-Cy), 21.7 (-CH<sub>2</sub>CH<sub>3</sub>), 25.2 (-CH<sub>2</sub>CH<sub>3</sub>), 26.1 (-Cy), 26.4 (-Cy), 26.8 (-Cy), 32.5 (-Cy), 36.2 (5-C), 38.2 (-Cy), 44.8 (4-C), 142.2 (2-C), 176.4 (3-C), 209.4 (1-CO). HRMS (EI) Calcd for C<sub>15</sub>H<sub>24</sub>O 220.1827, Found *m/z* 220.1819.

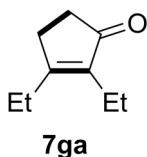

**Table 2, Entry 19, 2,3-diethylcyclopenten-2-one (7ga):** An authentic sample was prepared by using a stoichiometric amount of Ni(cod)<sub>2</sub> (0.50 mmol). To the resulting crude product was added NaOH*aq* (1.0 M, 50 mL), and then the organic layer was extracted with diethyl ether (50 mL x 3). The combined organic layer was dried over magnesium sulfate, filtered and concentrated *in vacuo*. Further purification by silica gel chromatography (eluent: hexane/AcOEt = 95/5) and HPLC (eluent: CHCl<sub>3</sub>) gave **7ga** as colorless oil (15.6 mg, 23%). <sup>1</sup>H NMR (400 MHz, CDCl<sub>3</sub>, rt): δ 0.97 (t, *J* = 7.6 Hz, 3H, 2-CH<sub>2</sub>CH<sub>3</sub>), 1.14 (t, *J* = 7.6 Hz, 3H, 3-CH<sub>2</sub>CH<sub>3</sub>), 2.17 (q, *J* = 7.6 Hz, 2H, 2-CH<sub>2</sub>CH<sub>3</sub>), 2.34 (m, 2H, 4-CH<sub>2</sub>-), 2.43 (q, *J* = 7.6 Hz, 2H, 3-CH<sub>2</sub>CH<sub>3</sub>), 2.48 (m, 2H, 5-CH<sub>2</sub>-). <sup>13</sup>C{<sup>1</sup>H} NMR (100 MHz, CDCl<sub>3</sub>, rt): δ 12.1 (-CH<sub>3</sub>), 13.3 (-CH<sub>3</sub>), 16.2 (-CH<sub>2</sub>CH<sub>3</sub>), 24.1 (-CH<sub>2</sub>CH<sub>3</sub>), 28.5 (5-C), 34.3 (4-C), 141.3 (2-C), 174.8 (3-C), 210.1 (CO). HRMS (EI) Calcd for C<sub>9</sub>H<sub>14</sub>O 138.1045, Found *m/z* 138.1048..

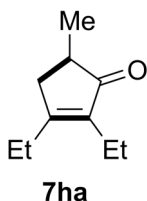

**Table 2, Entry 20, 2,3-diethyl-5-methylcyclopenten-2-one (7ha):** To the resulting crude product was added NaOH*aq* (1.0 M, 50 mL), and then the organic layer was extracted with diethyl ether (50 mL x 3). The combined organic layer was dried over magnesium sulfate, filtered and concentrated *in vacuo*. Further purification by silica gel chromatography (eluent: hexane/AcOEt = 95/5) gave **7ha** as colorless oil (94.2 mg, 62%). <sup>1</sup>H NMR (400 MHz, CDCl<sub>3</sub>, rt): δ 0.96 (t, *J* = 7.2 Hz, 3H, 2-CH<sub>2</sub>CH<sub>3</sub>), 1.12 (t, *J* = 7.2 Hz, 3H, 3-CH<sub>2</sub>CH<sub>3</sub>), 1.14 (d, *J* = 7.2 Hz, 3H, -CH<sub>3</sub>), 2.07 (br d, *J* = 18.0 Hz, 1H, -CHH-), 2.19 (q, *J* = 7.2 Hz, 2H, 3-CH<sub>2</sub>CH<sub>3</sub>), 2.33 (ddq, *J* = 2.4, 7.2, 7.2 Hz, 1H, -CH<sub>2</sub>C(Me)H), 2.42 (q, *J* = 7.2 Hz, 2H, 2-CH<sub>2</sub>CH<sub>3</sub>), 2.75 (dd, *J* = 7.2, 18.0 Hz, 1H, -CHH-). <sup>13</sup>C{<sup>1</sup>H} NMR (100 MHz, CDCl<sub>3</sub>, rt): δ 12.1 (-CH<sub>2</sub>CH<sub>3</sub>), 13.4 (-CH<sub>2</sub>CH<sub>3</sub>), 16.3 (-CH<sub>2</sub>CH<sub>3</sub>), 16.6 (-CH<sub>3</sub>), 23.9 (-CH<sub>2</sub>CH<sub>3</sub>), 37.7 (4-C), 39.5 (5-C), 139.9 (2-C), 172.9 (3-C), 212.4 (1-CO). HRMS (EI) Calcd for C<sub>10</sub>H<sub>16</sub>O 152.1201, Found *m/z* 152.1193.

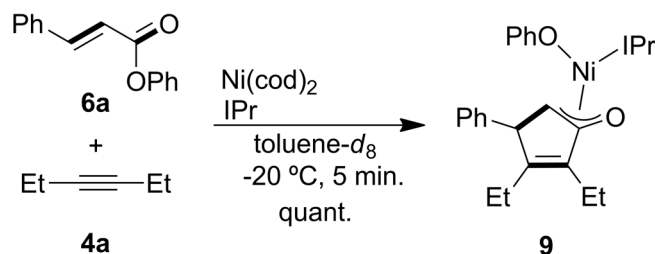

**Observation of a reaction intermediate of 6a and 4a in the presence of  $\text{Ni(cod)}_2$  and IPr:** To a  $\text{toluene-}d_8$  solution of  $\text{Ni(cod)}_2$  (22.0 mg, 0.08 mmol) and IPr (31.3 mg, 0.08 mmol) was added a  $\text{toluene-}d_8$  solution of **6a** (18.0 mg, 0.08 mmol) and **4a** (6.6 mg, 0.08 mmol) at  $-35^\circ\text{C}$ . The color of the solution turned into deep red. NMR observation at  $-20^\circ\text{C}$  revealed the quantitative formation of **9**.  $^1\text{H}$  NMR (600 MHz,  $\text{toluene-}d_8$ ,  $-20^\circ\text{C}$ ):  $\delta$  0.89–0.98 (m, 6H,  $-\text{CH}_3$ ), 1.07 (d,  $J = 6.0$  Hz, 6H,  $-\text{CH}_3$  groups of IPr), 1.13 (d,  $J = 6.0$  Hz, 6H,  $-\text{CH}_3$  groups of IPr), 1.14 (m, 1H,  $-\text{CHHCH}_3$ ), 1.20 (d,  $J = 6.0$  Hz, 6H,  $-\text{CH}_3$  groups of IPr), 1.74 (d,  $J = 6.0$  Hz, 6H,  $-\text{CH}_3$  groups of IPr), 1.75 (m, 1H,  $-\text{CHHCH}_3$ ), 1.86 (m, 1H,  $-\text{CHHCH}_3$ ), 2.20 (m, 1H,  $-\text{CHHCH}_3$ ), 2.54 (m, 2H,  $-\text{CH}(\text{CH}_3)_2$ ), 2.58 (s, 1H,  $-\text{CHPh}$ ), 3.54 (m, 2H,  $-\text{CH}(\text{CH}_3)_2$ ), 5.03 (s, 1H,  $-\text{CHCO}$ ), 6.34 (d,  $J = 6.6$  Hz, 2H, *o*-Ph), 6.52 (s, 2H,  $=\text{CH}-$ ), 6.58 (d,  $J = 7.2$  Hz, 2H, *o*-Ph), 6.66 (t,  $J = 6.6$  Hz, 1H, *p*-Ph), 6.94 (m, 1H, *p*-Ph), 7.00 (m, 4H, *m*-Ph), 7.12 (m, 4H, *m*-Ph (IPr)), 7.38 (m, 2H, *p*-Ph (IPr)).  $^{13}\text{C}\{^1\text{H}\}$  NMR (150 MHz,  $\text{toluene-}d_8$ ,  $-20^\circ\text{C}$ ):  $\delta$  13.9 ( $-\text{CH}_2\text{CH}_3$ ), 14.1 ( $-\text{CH}_2\text{CH}_3$ ), 16.1 ( $-\text{CH}_2-$ ), 20.0 ( $-\text{CH}_2-$ ), 22.6 ( $-\text{CH}_3$ ), 23.9 ( $-\text{CH}_3$ ), 25.4 ( $-\text{CH}_3$ ), 26.0 ( $-\text{CH}_3$ ), 28.7 ( $-\text{CH}(\text{CH}_3)_2$ ), 28.9 ( $-\text{CH}(\text{CH}_3)_2$ ), 52.6 ( $-\text{C}(\text{Ph})\text{H}-$ ), 81.8 ( $-\text{CHC}(\text{O})-$ ), 124.1 ( $=\text{CH}-$ ), 124.3 (*m*-Ph), 124.4 (*m*-Ph), 129.8 (*p*-Ph), 136.5 (*ipso*-Ph), 137.6 ( $\text{C}(\text{CO})=\text{C}$ ), 139.7 (*ipso*-Ph), 146.4 (*o*-Ph (IPr)), 146.5 (*o*-Ph (IPr)), 157.0 ( $\text{C}(\text{CO})=\text{C}$ ), 162.9 ( $\text{CHCO}$ ), 170.7 (*ipso*-OPh), 176.9 (NCN).

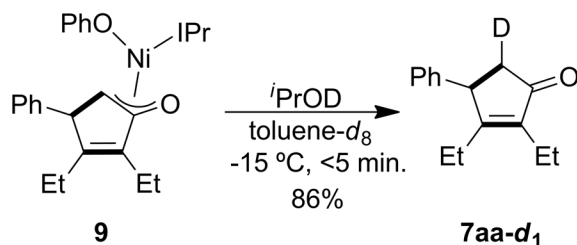

**Reaction of 9 with  $i\text{PrOD-}d_1$ :** Treatment of **9** with  $i\text{PrOD}$  ( $>98\%$  D) at  $-15^\circ\text{C}$  gave **7aa- $d_1$**  (98% D) in 86% yield.  $^1\text{H}$  (and  $^2\text{D}$ ) NMR observation of the reaction mixture revealed that deuterium was selectively incorporated at the 5-position.

### Isolation of ( $\eta^2$ -(*E*)-PhCH=CHCO<sub>2</sub>Ph)Ni(PCy<sub>3</sub>)<sub>2</sub>

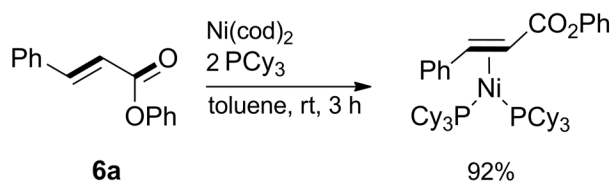

To toluene solution (5 mL) of Ni(cod)<sub>2</sub> (128.3 mg, 0.50 mmol) and PCy<sub>3</sub> (281.0 mg, 1.00 mmol) was added **6a** (128.3 mg, 0.53 mmol) at room temperature. The solution changed from yellow to red. The reaction mixture was stirred for 3 h and then concentration in *vacuo*. The residue was dissolved in toluene followed by the concentration in *vacuo* again. All volatiles were removed under reduced pressure, and then the deep red residue was purified by recrystallization from toluene/hexane at -35 °C, affording ( $\eta^2$ -(*E*)-PhCH=CHCO<sub>2</sub>Ph)Ni(PCy<sub>3</sub>)<sub>2</sub> (248.9 mg, 60%) as a red solid. The resulting supernatant was concentrated again, and then the recrystallization procedure was repeated twice, yielding another title complex (130.5 mg, 31%). The title compound was found to be intact in solution at room temperature. <sup>1</sup>H NMR (400 MHz, C<sub>6</sub>D<sub>6</sub>, rt):  $\delta$  1.00 (m, 2H, -Cy), 1.16–1.41 (m, 20H, -Cy), 1.56–1.92 (m, 32H, -Cy), 1.96–2.10 (m, 4H, -Cy), 2.16–2.33 (m, 8H, -Cy), 3.40 (m, *J* = 9.2 Hz, 1H, C(Ph)H=C(CO<sub>2</sub>Ph)H), 4.17 (m, 1H, C(Ph)H=C(CO<sub>2</sub>Ph)H), 6.94 (m, 1H, *p*-Ph), 7.06 (m, 1H, *p*-Ph), 7.18 (m, 4H, *m*-Ph x 2), 7.40 (d, *J* = 7.2 Hz, 2H, *o*-Ph), 7.64 (d, *J* = 6.8 Hz, 2H, *o*-Ph). <sup>13</sup>C{<sup>1</sup>H} NMR (100 MHz, C<sub>6</sub>D<sub>6</sub>, rt):  $\delta$  30.3 (-Cy), 30.5 (-Cy), 31.2 (d, *J* = 9.9 Hz, -Cy), 31.4 (d, *J* = 7.6 Hz, -Cy), 31.6 (d, *J* = 8.6 Hz, -Cy), 31.9 (d, *J* = 6.9 Hz, -Cy), 33.3 (-Cy), 34.5 (-Cy), 39.3 (-Cy), 40.3 (-Cy), 48.5 (d, *J* = 12.2 Hz, C(Ph)H=C(CO<sub>2</sub>Ph)H), 51.9 (d, *J* = 19.2 Hz, C(Ph)H=C(CO<sub>2</sub>Ph)H), 122.5 (-Ph), 123.5 (-Ph), 124.2 (-Ph), 128.7 (-Ph), 129.0 (-Ph), 129.3 (-Ph), 148.2 (ipso-Ph), 152.3 (ipso-OPh), 169.8 (CO). <sup>31</sup>P{<sup>1</sup>H} NMR (109 MHz, C<sub>6</sub>D<sub>6</sub>, rt):  $\delta$  31.9 (m). Anal. Calcd for C<sub>51</sub>H<sub>78</sub>NiO<sub>2</sub>P<sub>2</sub>: C, 72.59; H, 9.32. Found: C, 72.94; H, 9.49. X-ray data for ( $\eta^2$ -(*E*)-PhCH=CHCO<sub>2</sub>Ph)Ni(PCy<sub>3</sub>)<sub>2</sub>. *M* = 843.78, yellow, Monoclinic, *P*2<sub>1</sub>/*n* (No. 14), *a* = 13.9259(12) Å, *b* = 18.0957(14) Å, *c* = 18.4593(17) Å,  $\beta$  = 90.150(3)°, *V* = 4651.7(7) Å<sup>3</sup>, *Z* = 4, *D*<sub>calcd</sub> = 1.205 g/cm<sup>3</sup>, *T* = -150 (2)°C, *R*<sub>1</sub>(*wR*<sub>2</sub>) = 0.061 (0.131). Figure S1 shows an ORTEP drawing of the title complex.

### Isolation of ( $\eta^2$ -(*E*)-PhCH=CHCO<sub>2</sub>Ph)<sub>2</sub>Ni(PCy<sub>3</sub>)

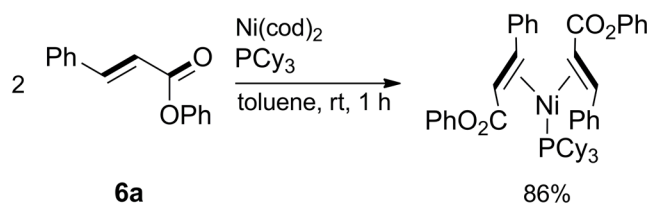

To toluene solution (5 mL) of Ni(cod)<sub>2</sub> (276.3 mg, 1.00 mmol) and PCy<sub>3</sub> (286.4 mg, 1.02 mmol) was added **6a** (452.3 mg, 2.02 mmol) at room temperature. The solution changed from yellow to bright red. The reaction mixture was stirred for 1 h and then concentration in *vacuo*. The residue was washed by hexane followed by the concentration in *vacuo* again. All volatiles were removed under reduced pressure, and then the orange residue was purified by recrystallization from toluene/hexane at -35 °C, affording ( $\eta^2$ -(*E*)-PhCH=CHCO<sub>2</sub>Ph)<sub>2</sub>Ni(PCy<sub>3</sub>) (675.5 mg, 86%) as an orange microcrystalline. The title compound was found to be intact in solution at room temperature. <sup>1</sup>H NMR (400 MHz, C<sub>6</sub>D<sub>6</sub>, rt):  $\delta$  0.78–1.04 (m, 2H, -Cy), 1.04–1.50 (m, 14H, -Cy), 1.50–1.84 (m, 11H, -Cy), 1.90–2.14 (m, 4H, -Cy), 2.27–2.46 (m, 2H, -Cy), 3.93 (d, *J* = 9.6 Hz, 1H, C(Ph)H=C(CO<sub>2</sub>Ph)H), 4.45 (dd, *J* = 10.0, 10.0 Hz, 1H, C(Ph)H=C(CO<sub>2</sub>Ph)H), 5.33 (dd, *J* = 10.4, 10.4 Hz, 1H, C(Ph)H=C(CO<sub>2</sub>Ph)H), 6.21 (d, *J* = 10.8 Hz, 1H, C(Ph)H=C(CO<sub>2</sub>Ph)H), 6.21 (m, 1H, -Ph), 6.74–7.05 (m, 10H, -Ph), 7.21 (m, 5H, -Ph), 7.29 (d, *J* = 8.0 Hz, 2H, *o*-Ph), 7.60 (d, *J* = 7.2 Hz, 2H, *o*-Ph). <sup>13</sup>C{<sup>1</sup>H} NMR (100 MHz, C<sub>6</sub>D<sub>6</sub>, rt):  $\delta$  26.9 (-Cy), 27.5 (d, *J* = 9.9 Hz, -Cy), 28.0 (d, *J* = 9.1 Hz, -Cy), 30.3 (-Cy), 30.7 (-Cy), 34.4 (d, *J* = 15.3 Hz, -Cy), 55.1 (C(Ph)H=C(CO<sub>2</sub>Ph)H), 69.1 (C(Ph)H=C(CO<sub>2</sub>Ph)H), 70.1 (d, *J* = 6.9 Hz, C(Ph)H=C(CO<sub>2</sub>Ph)H), 75.1 (d, *J* = 7.2 Hz, C(Ph)H=C(CO<sub>2</sub>Ph)H), 122.6 (-Ph), 123.0 (-Ph), 124.8 (-Ph), 125.0 (-Ph), 125.4 (-Ph), 126.6 (-Ph), 126.7 (-Ph), 128.5 (-Ph), 128.8 (-Ph), 129.0 (-Ph), 129.4 (-Ph), 140.2 (*ipso*-Ph), 142.6 (*ipso*-Ph), 151.7 (*ipso*-OPh), 151.9 (*ipso*-OPh), 167.4 (CO), 169.8 (CO), one peak attributed Phenyl unit might be obscured by the solvent signal. <sup>31</sup>P{<sup>1</sup>H} NMR (109 MHz, C<sub>6</sub>D<sub>6</sub>, rt):  $\delta$  27.8 (s). Anal. Calcd for C<sub>48</sub>H<sub>57</sub>NiO<sub>4</sub>P: C, 73.20; H, 7.29. Found: C, 72.92; H, 7.58. X-ray data for ( $\eta^2$ -(*E*)-PhCH=CHCO<sub>2</sub>Ph)<sub>2</sub>Ni(PCy<sub>3</sub>). *M* = 787.62, yellow, Triclinic, *P*-1 (No. 2), *a* = 11.9158(9) Å, *b* = 12.1881(9) Å, *c* = 14.9957(10) Å,  $\alpha$  = 87.464(3)°,  $\beta$  = 83.542(3)°,  $\gamma$  = 69.604(2)°, *V* = 2028.3(2) Å<sup>3</sup>, *Z* = 2, *D*<sub>calcd</sub> = 1.290 g/cm<sup>3</sup>, *T* = -150 (2)°C, *R*<sub>1</sub>(*wR*<sub>2</sub>) = 0.072 (0.152). Figure S2 shows an ORTEP drawing of the title complex.

**Reaction of ( $\eta^2$ -(*E*)-PhCH=CHCO<sub>2</sub>Ph)Ni(PCy<sub>3</sub>)<sub>2</sub> with 3-hexyne**

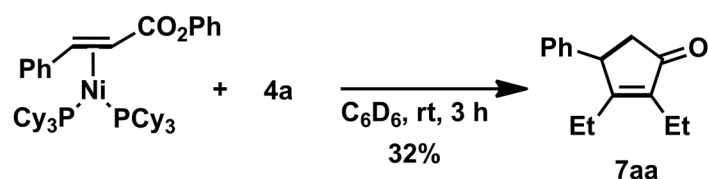

To a C<sub>6</sub>D<sub>6</sub> solution of ( $\eta^2$ -(*E*)-PhCH=CHCO<sub>2</sub>Ph)Ni(PCy<sub>3</sub>)<sub>2</sub> (34.0 mg, 0.04 mmol) was added 3-hexyne at room temperature. The reaction mixture was transferred into a J-Young NMR tube. Monitoring of the reaction by NMR spectroscopy demonstrated that all of ( $\eta^2$ -(*E*)-PhCH=CHCO<sub>2</sub>Ph)Ni(PCy<sub>3</sub>)<sub>2</sub> were consumed within 3 hours, whereas no significant intermediates were observed. The yield of **7aa** (2.7 mg, 32%) was determined by GC analysis using tetradecane as an internal standard.

**Reaction of ( $\eta^2$ -(*E*)-PhCH=CHCO<sub>2</sub>Ph)<sub>2</sub>Ni(PCy<sub>3</sub>) with 3-hexyne**

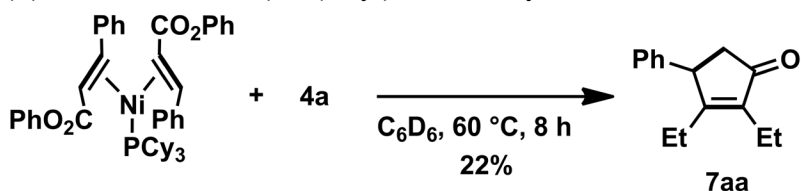

To a C<sub>6</sub>D<sub>6</sub> solution of ( $\eta^2$ -(*E*)-PhCH=CHCO<sub>2</sub>Ph)<sub>2</sub>Ni(PCy<sub>3</sub>) (31.0 mg, 0.04 mmol) was added 3-hexyne at room temperature. The reaction mixture was transferred into a J-Young NMR tube and kept at 60 °C. Monitoring of the reaction by NMR spectroscopy demonstrated that all of ( $\eta^2$ -(*E*)-PhCH=CHCO<sub>2</sub>Ph)<sub>2</sub>Ni(PCy<sub>3</sub>) was consumed after 8 hours, whereas no significant intermediates were observed. The reaction did not proceed at room temperature. The yield of **7aa** (2.0 mg, 22%) was determined by GC analysis using tetradecane as an internal standard.

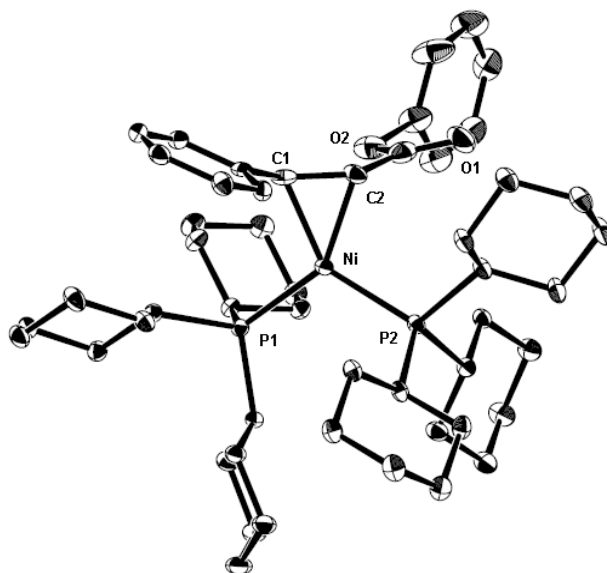

**Figure S1.** ORTEP drawing of  $(\eta^2\text{-(E)-PhCH=CHCO}_2\text{Ph})\text{Ni}(\text{PCy}_3)_2$  with thermal ellipsoids at the 30% probability level. H atoms are omitted for clarity.

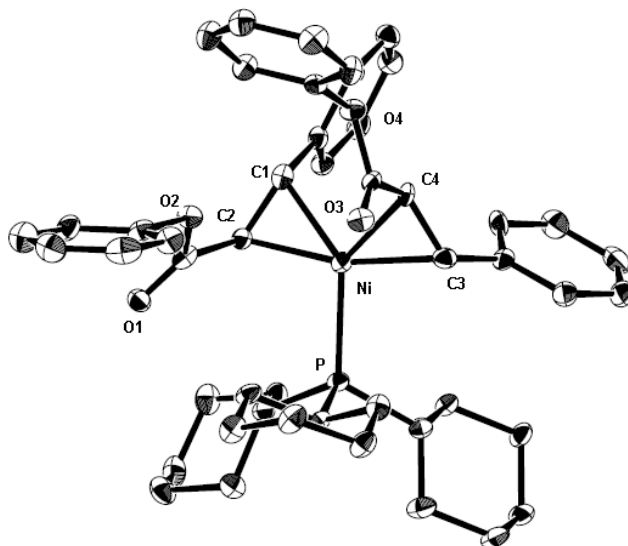

**Figure S2.** ORTEP drawing of  $(\eta^2\text{-(E)-PhCH=CHCO}_2\text{Ph})_2\text{Ni}(\text{PCy}_3)$  with thermal ellipsoids at the 30% probability level. H atoms are omitted for clarity.

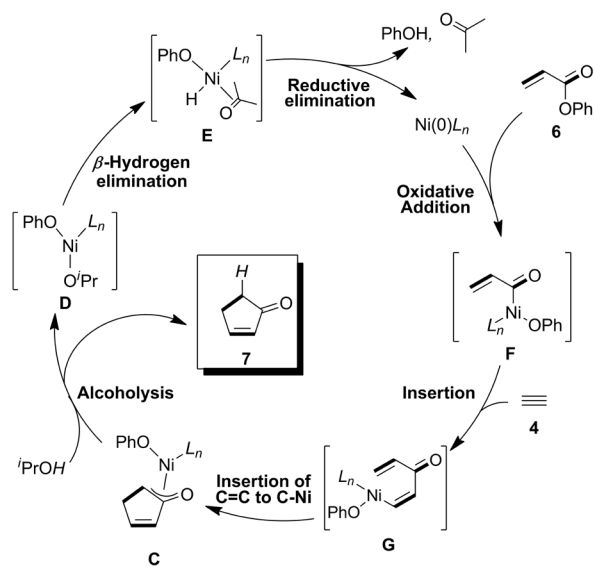

**Scheme S1.** An alternative reaction mechanism, involving a C–O bond activation of phenylester, for the Ni-catalyzed dephenoxylation cycloaddition reaction

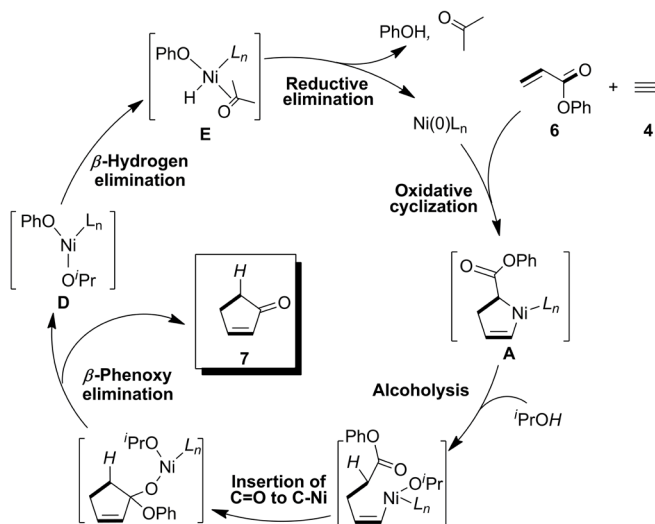

**Scheme S2.** An alternative reaction mechanism, involving alcoholysis of **A** followed by ester carbonyl insertion into the Ni–C bond and  $\beta$ -phenoxy elimination, for the Ni-catalyzed dephenoxylation cycloaddition reaction

## References

- [1] Takahashi, T.; Xi, Z.; Nishihara, Y.; Huo, S.; Kasai, K.; Aoyagi, K.; Denisov, V.; Negishi, E. *Tetrahedron*, **1997**, 53, 9123.

7.161 7.009 6.965 6.922 6.903 6.882 6.867 6.848 6.827 6.820 6.809 6.776 6.763 6.745 6.726 6.711 6.689 6.588 6.570 6.551 6.410 6.390 6.008 5.833 5.442 5.198 2.957 2.922 2.794 1.213 1.196 1.169 1.127 1.120 1.113 1.019 0.999 0.991 0.980 0.968 0.956 0.817 0.726 0.713 0.699 0.659 0.651 0.633 0.248 0.185 0.102 0.069 -0.000

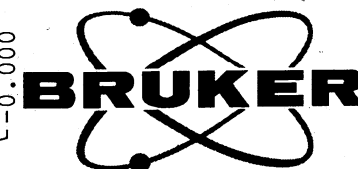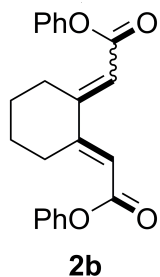

Current Data Parameters  
NAME 00\_PhCPA\_[3+3]\_Dimer  
EXPNO 1  
PROCNO 1

F2 - Acquisition Parameters  
Date\_ 20091021  
Time 23.06  
INSTRUM spect  
PROBHD 5 mm PABBO BB-  
PULPROG zg30  
TD 65536  
SOLVENT C6D6  
NS 16  
DS 2  
SWH 8223.685 Hz  
FIDRES 0.125483 Hz  
AQ 3.9846387 sec  
RG 203  
DW 60.800 usec  
DE 6.50 usec  
TE 295.8 K  
D1 1.00000000 sec  
TD0 1

===== CHANNEL f1 =====  
NUC1 1H  
P1 14.00 usec  
PL1 -1.00 dB  
PL1W 13.34481144 W  
SFO1 400.1324710 MHz

F2 - Processing parameters  
SI 32768  
SF 400.1299964 MHz  
WDW EM  
SSB 0  
LB 0.30 Hz  
GB 0  
PC 1.00

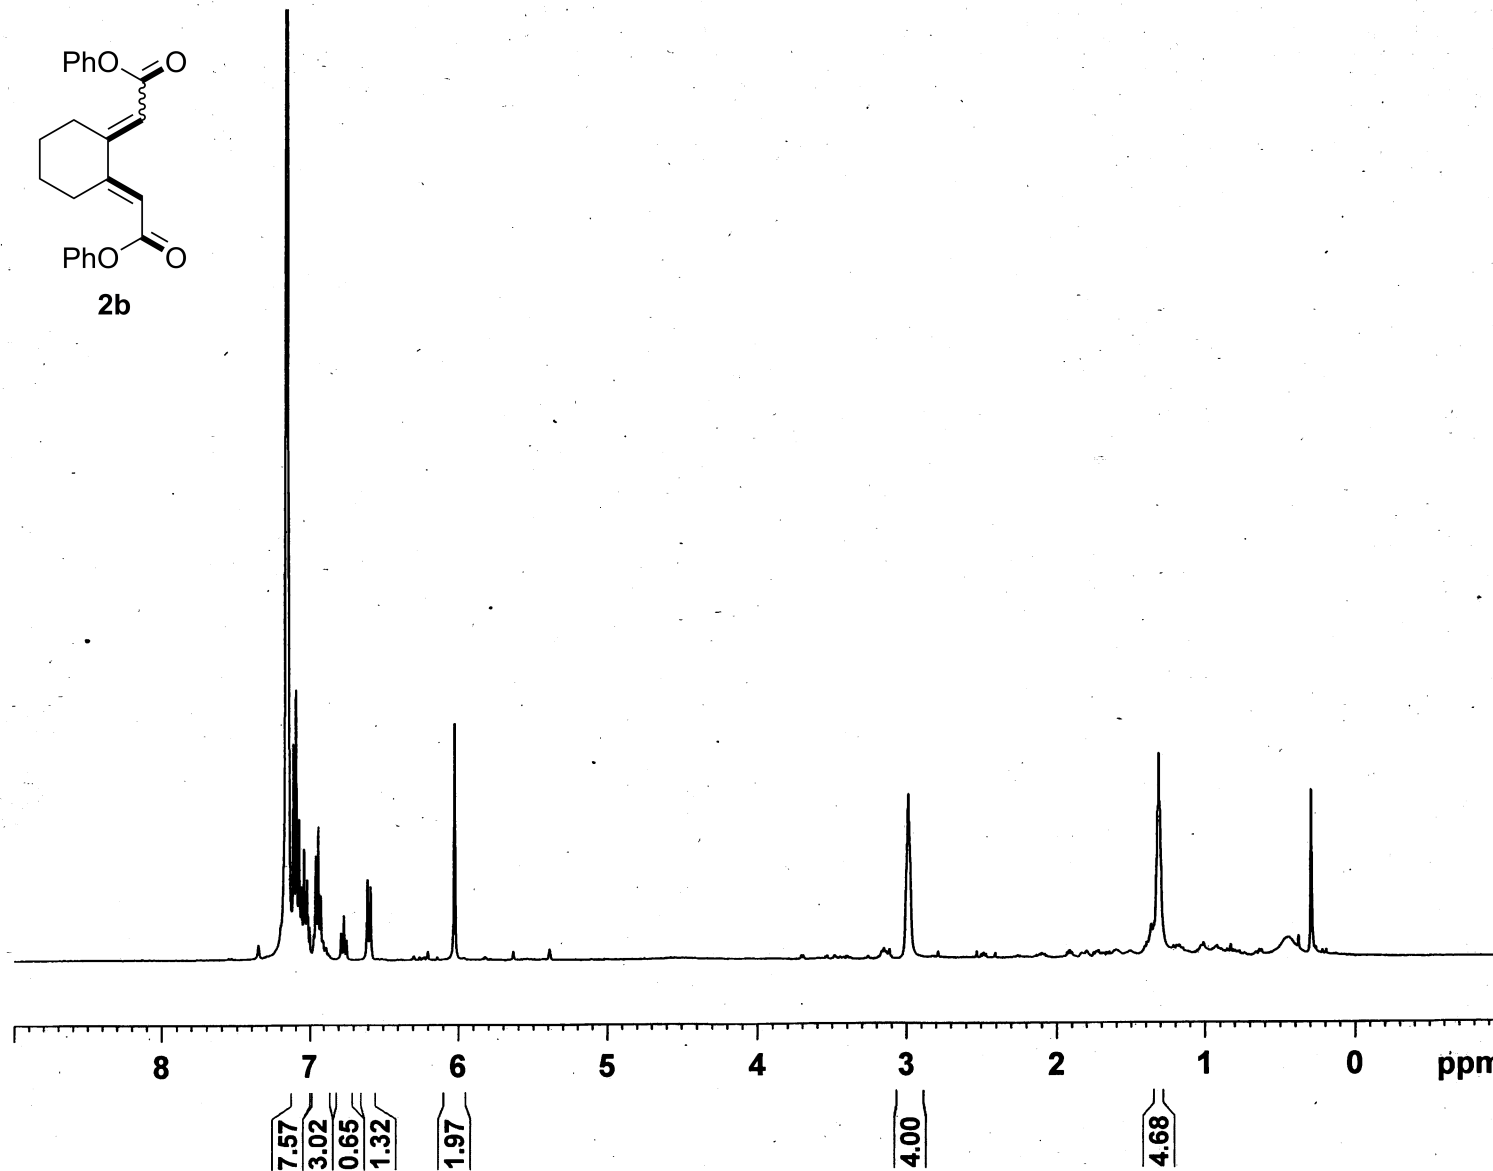

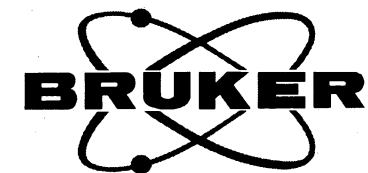

Current Data Parameters  
 NAME 00\_PhCPA\_[3+3]\_Dimer  
 EXPNO 13  
 PROCNO 1

F2 - Acquisition Parameters  
 Date 20091021  
 Time 23.44  
 INSTRUM spect  
 PROBHD 5 mm PABBO BB-  
 PULPROG zgpg30  
 TD 65536  
 SOLVENT C6D6  
 NS 4096  
 DS 4  
 SWH 25252.525 Hz  
 FIDRES 0.385323 Hz  
 AQ 1.2976629 sec  
 RG 114  
 DW 19.800 usec  
 DE 6.50 usec  
 TE 297.5 K  
 D1 2.00000000 sec  
 D11 0.03000000 sec  
 TD0 1

===== CHANNEL f1 =====  
 NUC1 13C  
 P1 10.00 usec  
 PL1 2.20 dB  
 PL1W 21.94663811 W  
 SFO1 100.6228298 MHz

===== CHANNEL f2 =====  
 CPDPRG2 waltz16  
 NUC2 1H  
 PCPD2 75.00 usec  
 PL2 -1.00 dB  
 PL12 14.20 dB  
 PL13 15.00 dB  
 PL2W 13.34481144 W  
 PL12W 0.40300688 W  
 PL13W 0.33520651 W  
 SFO2 400.1316005 MHz

F2 - Processing parameters  
 SI 32768  
 SF 100.6127368 MHz  
 WDW EM  
 SSB 0  
 LB 1.00 Hz  
 GB 0  
 PC 1.40

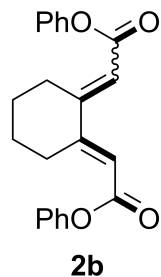

164.01  
 162.49  
 151.33  
 129.72  
 129.57  
 128.24  
 128.00  
 127.76  
 125.77  
 122.00  
 115.54  
 114.92

30.37  
 25.60

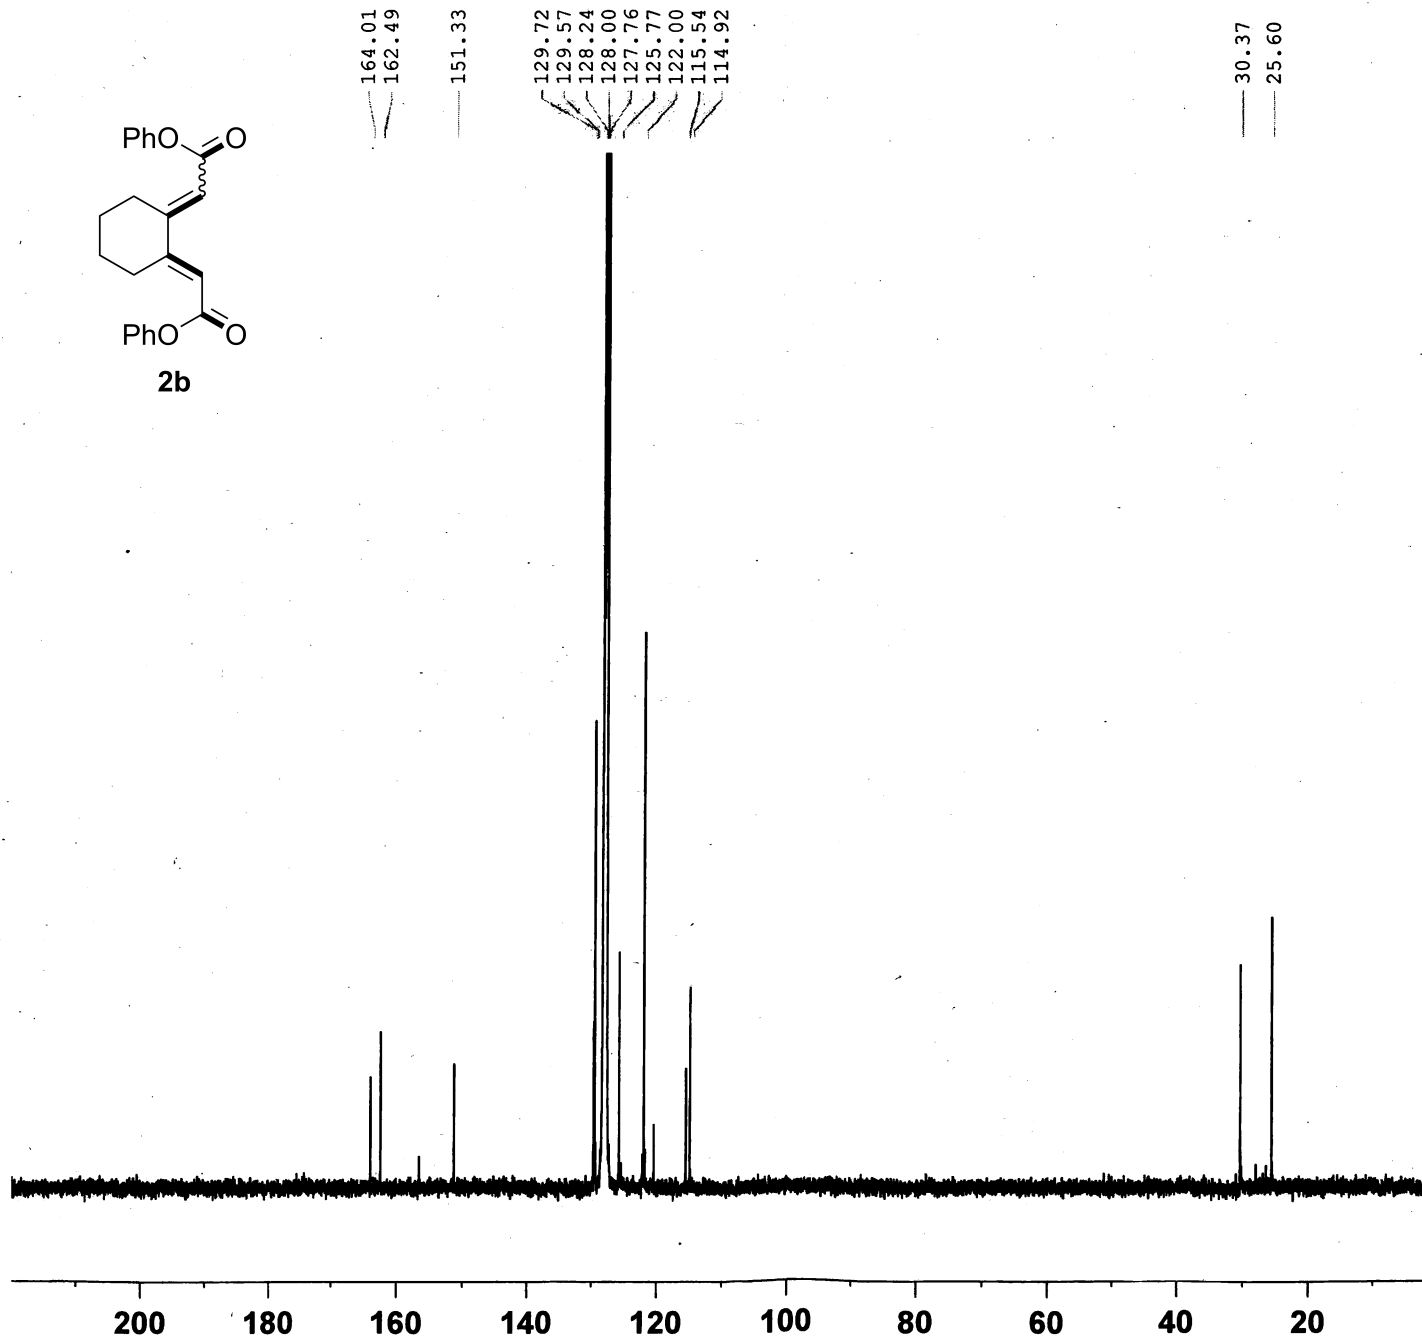

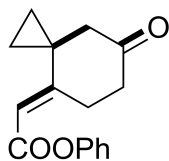

3

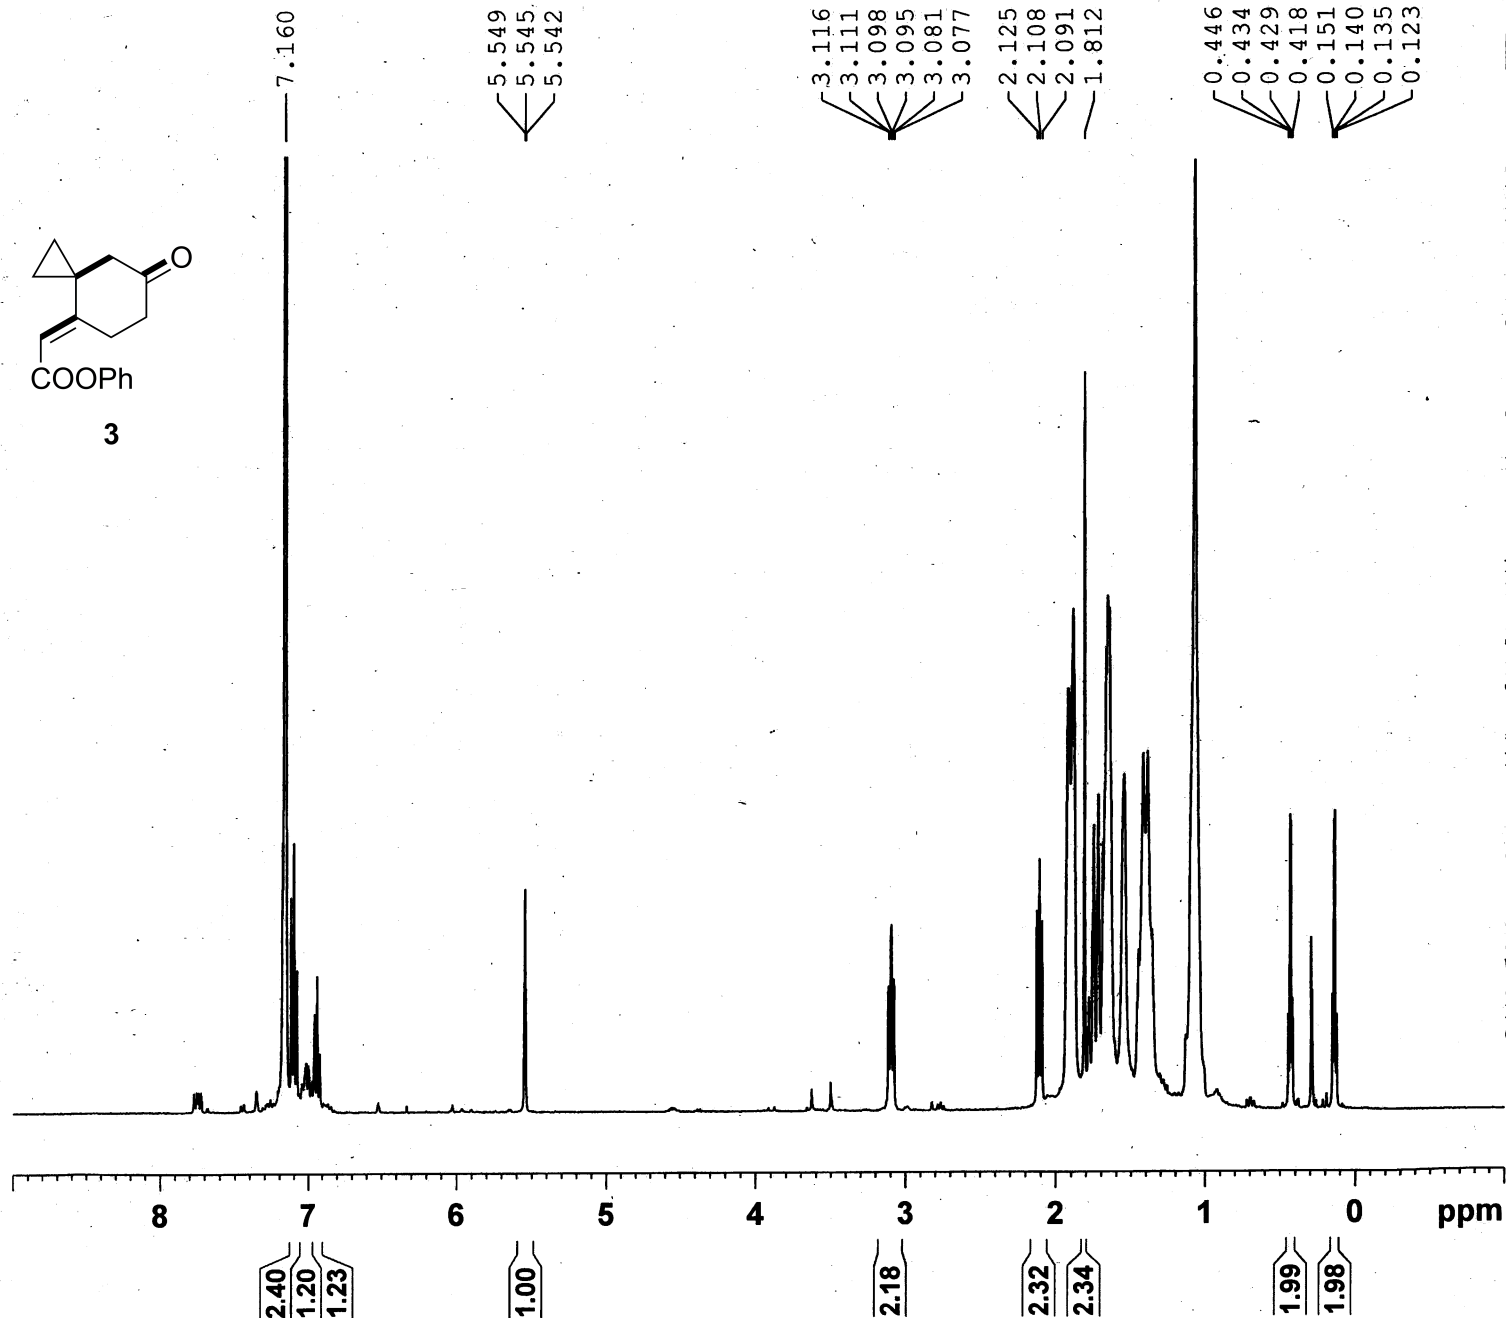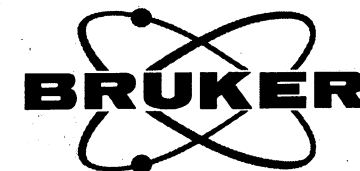

Current Data Parameters  
 NAME 00\_PhCPA\_[3+2]\_Dimer  
 EXPNO 1  
 PROCNO 1

F2 - Acquisition Parameters  
 Date 20091022  
 Time 22.36  
 INSTRUM spect  
 PROBHD 5 mm PABBO BB-  
 PULPROG zg30  
 TD 65536  
 SOLVENT C6D6  
 NS 16  
 DS 2  
 SWH 8223.685 Hz  
 FIDRES 0.125483 Hz  
 AQ 3.9846387 sec  
 RG 128  
 DW 60.800 usec  
 DE 6.50 usec  
 TE 295.9 K  
 D1 1.00000000 sec  
 TD0 1

===== CHANNEL f1 =====  
 NUC1 1H  
 P1 14.00 usec  
 PL1 -1.00 dB  
 PL1W 13.34481144 W  
 SFO1 400.1324710 MHz

F2 - Processing parameters  
 SI 32768  
 SF 400.1299962 MHz  
 WDW EM  
 SSB 0  
 LB 0.30 Hz  
 GB 0  
 PC 1.00

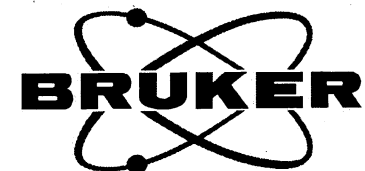

Current Data Parameters  
NAME 00\_PhCPA\_[3+2]\_Dimer  
EXPNO 13  
PROCNO 1

F2 - Acquisition Parameters  
Date 20091023  
Time 2.27  
INSTRUM spect  
PROBHD 5 mm PABBO BB-  
PULPROG zgpg30  
TD 65536  
SOLVENT C6D6  
NS 4096  
DS 4  
SWH 25252.525 Hz  
FIDRES 0.385323 Hz  
AQ 1.2976629 sec  
RG 114  
DW 19.800 usec  
DE 6.50 usec  
TE 297.8 K  
D1 2.00000000 sec  
D11 0.03000000 sec  
TD0 1

===== CHANNEL f1 =====  
NUC1 13C  
P1 10.00 usec  
PL1 2.20 dB  
PL1W 21.94663811 W  
SFO1 100.6228298 MHz

===== CHANNEL f2 =====  
CPDPRG2 waltz16  
NUC2 1H  
PCPD2 75.00 usec  
PL2 -1.00 dB  
PL12 14.20 dB  
PL13 15.00 dB  
PL2W 13.34481144 W  
PL12W 0.40300688 W  
PL13W 0.33520651 W  
SFO2 400.1316005 MHz

F2 - Processing parameters  
SI 32768  
SF 100.6127369 MHz  
WDW EM  
SSB 0  
LB 1.00 Hz  
GB 0  
PC 1.40

207.12  
165.84  
164.47  
151.43  
129.56  
128.24  
128.00  
127.76  
125.66  
122.05  
109.97

47.39  
37.93  
35.95  
35.34  
27.20  
27.09  
27.03  
26.70  
26.67  
26.46  
22.82  
15.79

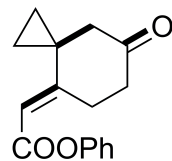

3

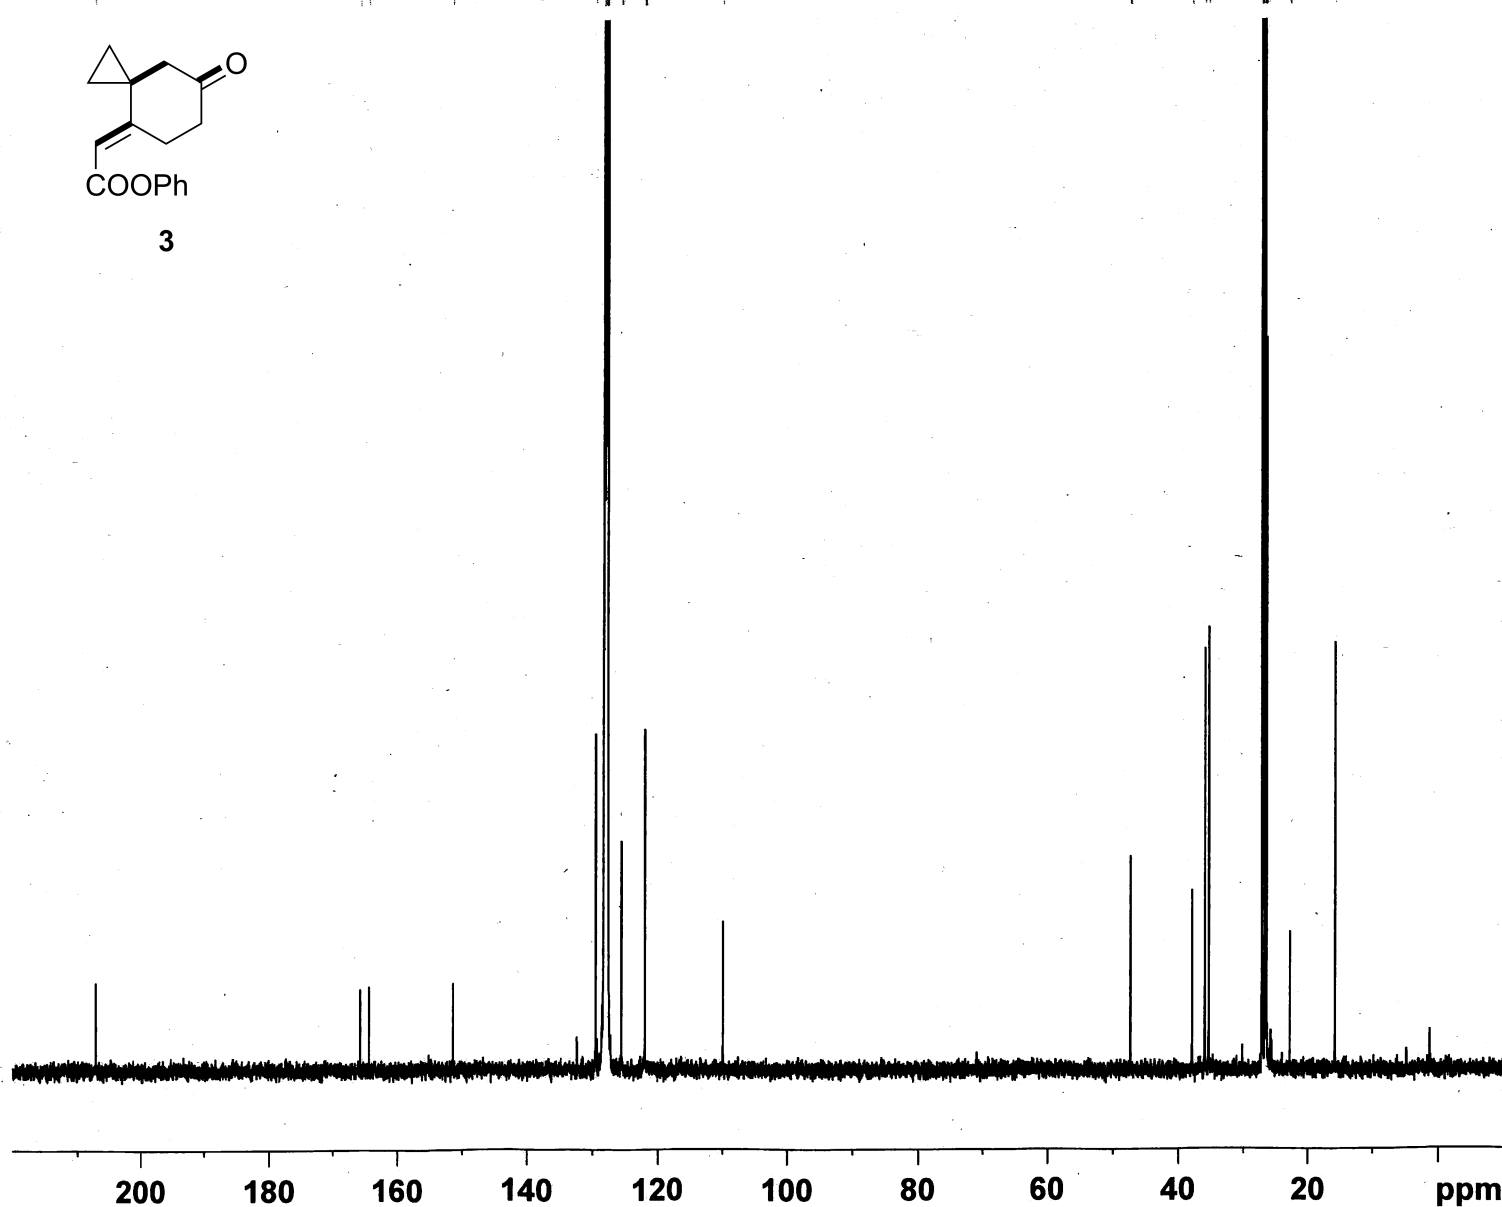

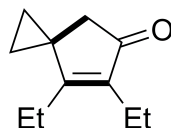

—7.260

2.426  
2.245  
2.226  
2.207  
2.188  
2.004  
1.985  
1.966  
1.947  
1.715  
1.080  
1.061  
1.055  
1.041  
1.036  
1.027  
1.017  
0.949  
0.939  
0.934  
0.920

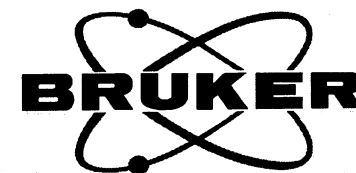

Current Data Parameters  
NAME 01\_PhCPA\_3-hexyne  
EXPNO 1  
PROCNO 1

F2 - Acquisition Parameters  
Date\_ 20100802  
Time 16.42  
INSTRUM spect  
PROBHD 5 mm PABBO BB-  
PULPROG zg30  
TD 65536  
SOLVENT CDCl3  
NS 16  
DS 2  
SWH 8223.685 Hz  
FIDRES 0.125483 Hz  
AQ 3.9846387 sec  
RG 114  
DW 60.800 usec  
DE 6.50 usec  
TE 302.6 K  
D1 1.00000000 sec  
TD0 1

===== CHANNEL f1 =====  
NUC1 1H  
P1 14.00 usec  
PL1 -1.00 dB  
PL1W 13.34481144 W  
SFO1 400.1324710 MHz

F2 - Processing parameters  
SI 32768  
SF 400.1300151 MHz  
WDW EM  
SSB 0  
LB 0.30 Hz  
GB 0  
PC 1.00

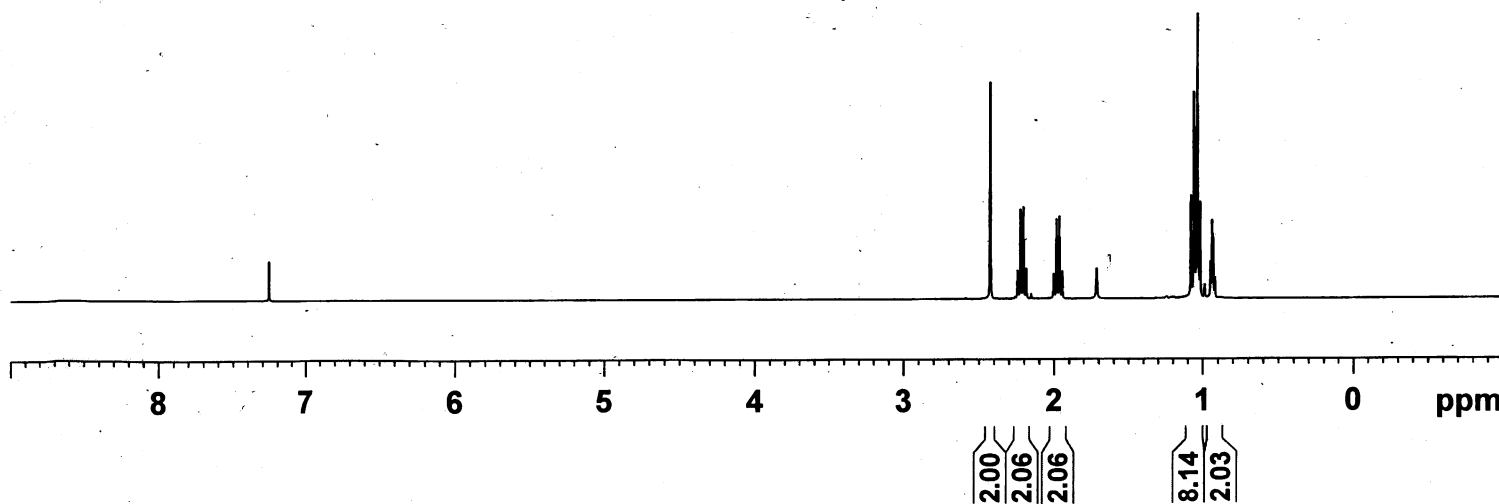

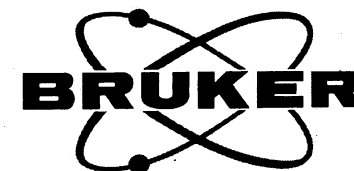

Current Data Parameters  
 NAME 01\_PhCPA\_3-hexyne  
 EXPNO 13  
 PROCNO 1

F2 - Acquisition Parameters  
 Date 20100802  
 Time 16.47  
 INSTRUM spect  
 PROBHD 5 mm PABBO BB-  
 PULPROG zgpg30  
 TD 65536  
 SOLVENT CDCl3  
 NS 165  
 DS 4  
 SWH 24038.461 Hz  
 FIDRES 0.366798 Hz  
 AQ 1.3631988 sec  
 RG 203  
 DW 20.800 usec  
 DE 6.50 usec  
 TE 303.7 K  
 D1 2.00000000 sec  
 D11 0.03000000 sec  
 TD0 1

===== CHANNEL f1 =====  
 NUC1 13C  
 P1 10.00 usec  
 PL1 2.20 dB  
 PL1W 21.94663811 W  
 SFO1 100.6228298 MHz

===== CHANNEL f2 =====  
 CPDPRG2 waltz16  
 NUC2 1H  
 PCPD2 75.00 usec  
 PL2 -1.00 dB  
 PL12 14.20 dB  
 PL13 15.00 dB  
 PL2W 13.34481144 W  
 PL12W 0.40300688 W  
 PL13W 0.33520651 W  
 SFO2 400.1316005 MHz

F2 - Processing parameters  
 SI 32768  
 SF 100.6127690 MHz  
 WDW EM  
 SSB 0  
 LB 1.00 Hz  
 GB 0  
 PC 1.40

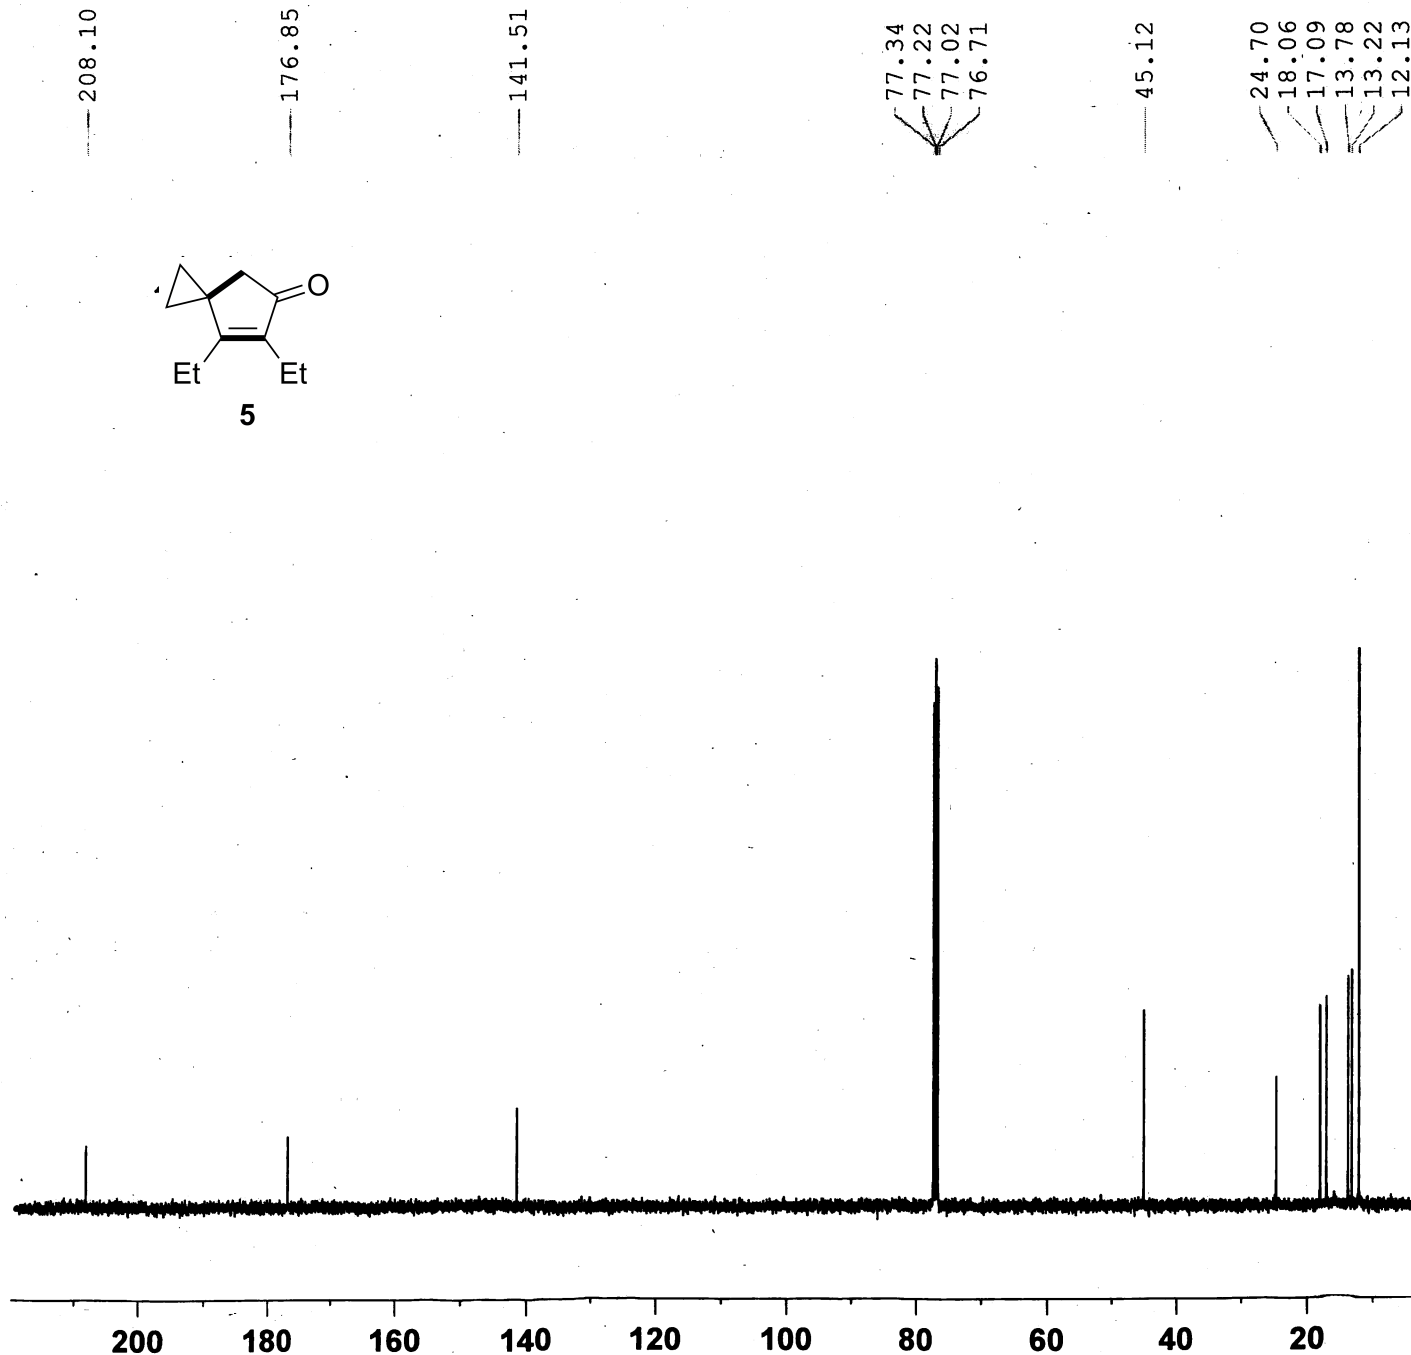

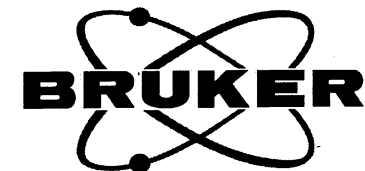

Current Data Parameters  
 NAME 02\_PhCi\_3-hexyne  
 EXPNO 1  
 PROCNO 1

F2 - Acquisition Parameters

Date\_ 20100226  
 Time 18.14  
 INSTRUM spect  
 PROBHD 5 mm PABBO BB-  
 PULPROG zg30  
 TD 65536  
 SOLVENT CDCl3  
 NS 16  
 DS 2  
 SWH 8223.685 Hz  
 FIDRES 0.125483 Hz  
 AQ 3.9846387 sec  
 RG 28.5  
 DW 60.800 usec  
 DE 6.50 usec  
 TE 295.8 K  
 D1 1.00000000 sec  
 TDO 1

===== CHANNEL f1 =====

NUC1 1H  
 P1 14.00 usec  
 PL1 -1.00 dB  
 PL1W 13.34481144 W  
 SFO1 400.1324710 MHz

F2 - Processing parameters

SI 32768  
 SF 400.1300083 MHz  
 WDW EM  
 SSB 0  
 LB 0.30 Hz  
 GB 0  
 PC 1.00

7.321  
7.317  
7.303  
7.284  
7.249  
7.246  
7.243  
7.233  
7.228  
7.222  
7.209  
7.103  
7.099  
7.082

3.971  
3.954  
2.907  
2.889  
2.859  
2.842  
2.483  
2.464  
2.448  
2.429  
2.352  
2.346  
2.309  
2.305  
2.299  
2.291  
2.272  
2.253  
2.020  
2.001  
1.986  
1.967  
1.087  
1.069  
1.050  
1.006  
0.987  
0.968  
-0.002

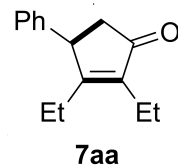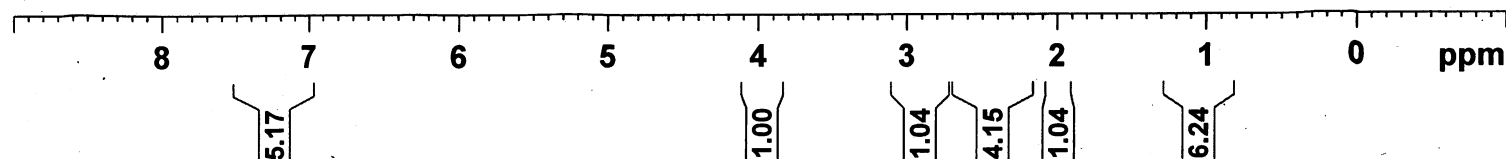

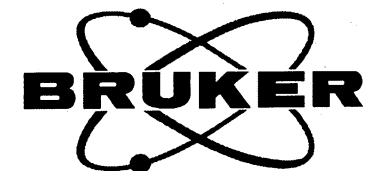

Current Data Parameters  
 NAME 02\_PhCi\_3-hexyne  
 EXPNO 2  
 PROCNO 1

F2 - Acquisition Parameters  
 Date 20100226  
 Time 18.20  
 INSTRUM spect  
 PROBHD 5 mm PABBO BB-  
 PULPROG zgpg30  
 TD 65536  
 SOLVENT CDC13  
 NS 63  
 DS 4  
 SWH 24038.461 Hz  
 FIDRES 0.366798 Hz  
 AQ 1.3631988 sec  
 RG 203  
 DW 20.800 usec  
 DE 6.50 usec  
 TE 297.2 K  
 D1 2.00000000 sec  
 D11 0.03000000 sec  
 TD0 1

===== CHANNEL f1 =====  
 NUC1 13C  
 P1 10.00 usec  
 PL1 2.20 dB  
 PL1W 21.94663811 W  
 SFO1 100.6228298 MHz

===== CHANNEL f2 =====  
 CPDPRG2 waltz16  
 NUC2 1H  
 PCPD2 75.00 usec  
 PL2 -1.00 dB  
 PL12 14.20 dB  
 PL13 15.00 dB  
 PL2W 13.34481144 W  
 PL12W 0.40300688 W  
 PL13W 0.33520651 W  
 SFO2 400.1316005 MHz

F2 - Processing parameters  
 SI 32768  
 SF 100.6127707 MHz  
 WDW EM  
 SSB 0  
 LB 1.00 Hz  
 GB 0  
 PC 1.40

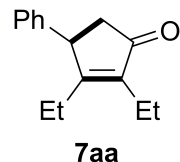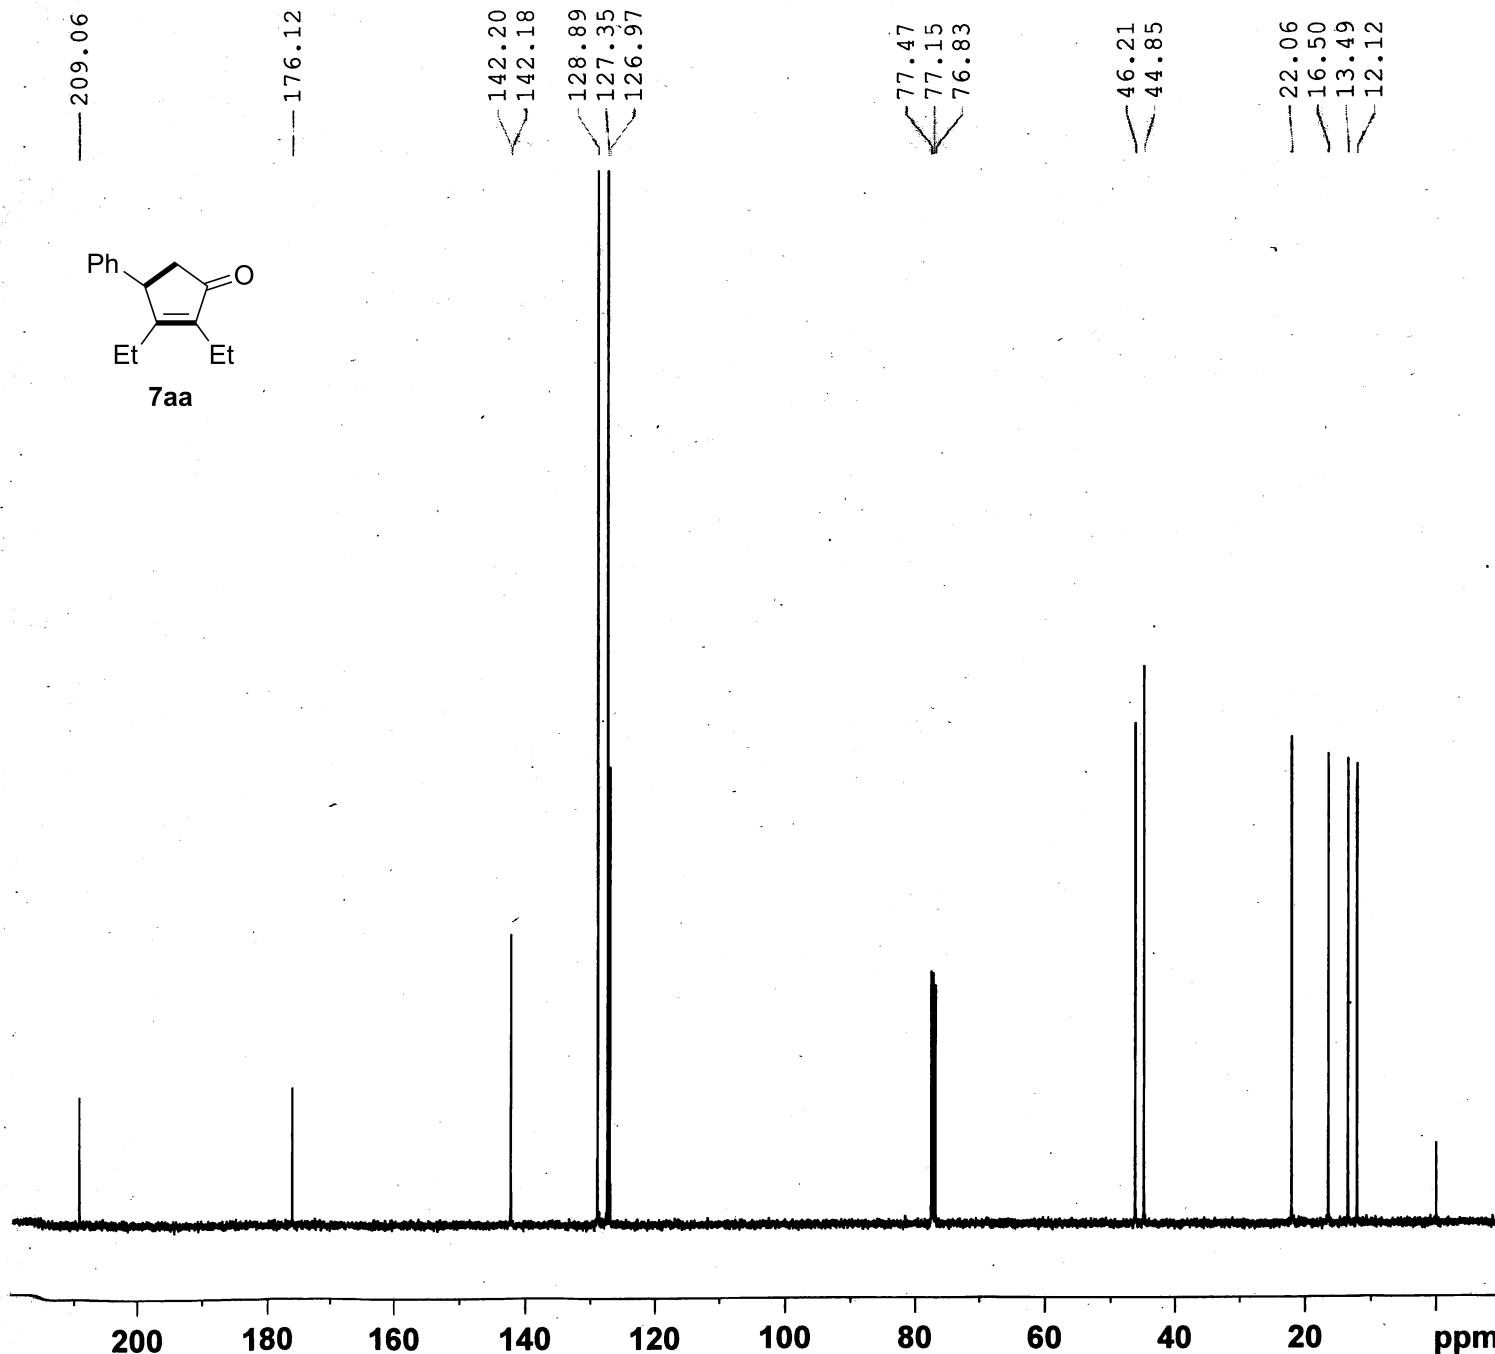

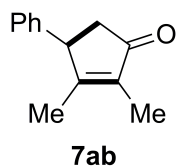

7.328  
7.325  
7.308  
7.304  
7.292  
7.289  
7.260  
7.257  
7.253  
7.250  
7.235  
7.090  
7.086  
7.081  
7.069

3.811  
3.796  
2.920  
2.902  
2.872  
2.855  
2.379  
2.374  
2.332  
2.327  
1.813  
1.786  
1.784  
1.782  
1.780

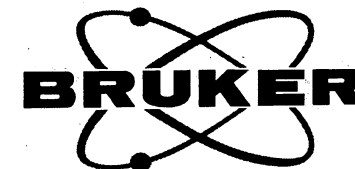

Current Data Parameters  
NAME 03\_PhCi\_2-butyne  
EXPNO 1  
PROCNO 1

F2 - Acquisition Parameters  
Date\_ 20100302  
Time 17.58  
INSTRUM spect  
PROBHD 5 mm PABBO BB-  
PULPROG zg30  
TD 65536  
SOLVENT CDCl3  
NS 16  
DS 2  
SWH 8223.685 Hz  
FIDRES 0.125483 Hz  
AQ 3.9846387 sec  
RG 71.8  
DW 60.800 usec  
DE 6.50 usec  
TE 294.9 K  
D1 1.00000000 sec  
TD0 1

===== CHANNEL f1 =====  
NUC1 1H  
P1 14.00 usec  
PL1 -1.00 dB  
PL1W 13.34481144 W  
SFO1 400.1324710 MHz

F2 - Processing parameters  
SI 32768  
SF 400.1300172 MHz  
WDW EM  
SSB 0  
LB 0.30 Hz  
GB 0  
PC 1.00

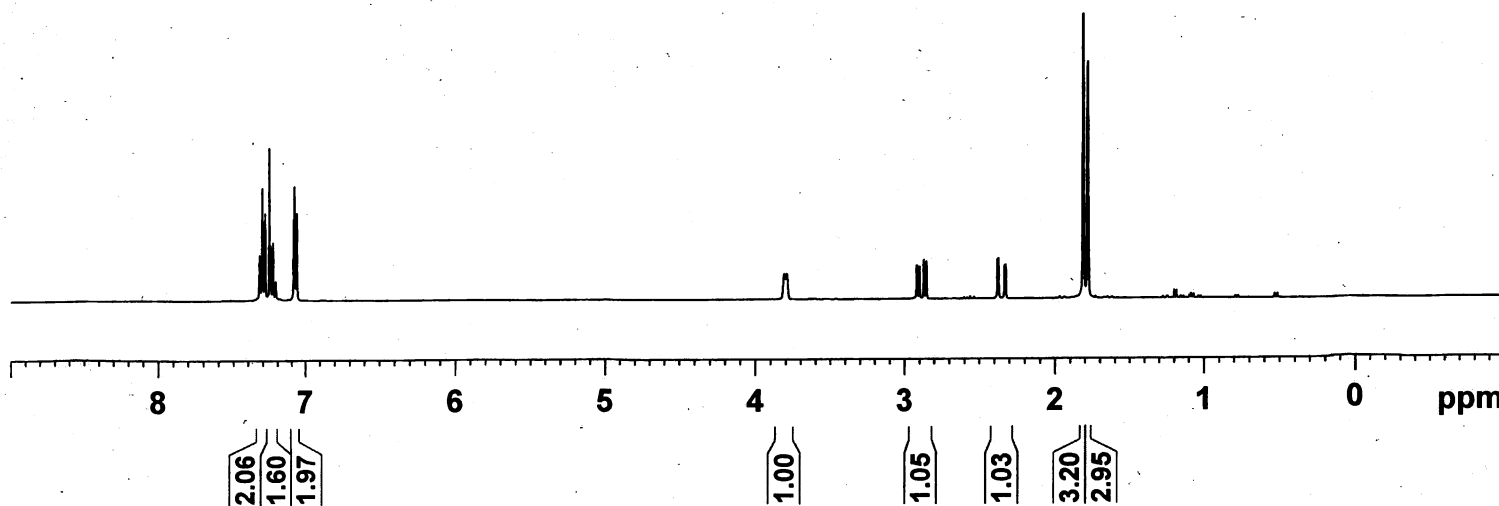

209.07

171.62

142.08

137.11

128.94

127.36

127.06

77.41

77.30

77.10

76.78

49.16

44.57

15.57

8.25

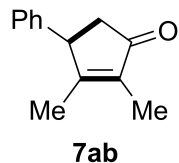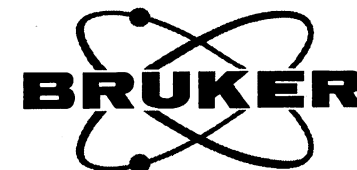

Current Data Parameters  
 NAME 03\_PhCi\_2-butyne  
 EXPNO 2  
 PROCNO 1

F2 - Acquisition Parameters  
 Date 20100302  
 Time 18.01  
 INSTRUM spect  
 PROBHD 5 mm PABBO BB-  
 PULPROG zgpg30  
 TD 65536  
 SOLVENT CDC13  
 NS 11  
 DS 4  
 SWH 24038.461 Hz  
 FIDRES 0.366798 Hz  
 AQ 1.3631988 sec  
 RG 203  
 DW 20.800 usec  
 DE 6.50 usec  
 TE 295.3 K  
 D1 2.00000000 sec  
 D11 0.03000000 sec  
 TD0 1

===== CHANNEL f1 =====  
 NUC1 13C  
 P1 10.00 usec  
 PL1 2.20 dB  
 PL1W 21.94663811 W  
 SFO1 100.6228298 MHz

===== CHANNEL f2 =====  
 CPDPRG2 waltz16  
 NUC2 1H  
 PCPD2 75.00 usec  
 PL2 -1.00 dB  
 PL12 14.20 dB  
 PL13 15.00 dB  
 PL2W 13.34481144 W  
 PL12W 0.40300688 W  
 PL13W 0.33520651 W  
 SFO2 400.1316005 MHz

F2 - Processing parameters  
 SI 32768  
 SF 100.6127690 MHz  
 WDW EM  
 SSB 0  
 LB 1.00 Hz  
 GB 0  
 PC 1.40

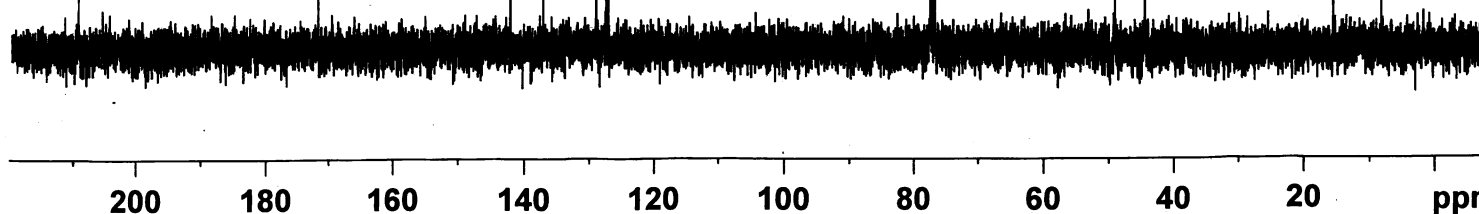

7.289  
7.285  
7.271  
7.260  
7.252  
7.216  
7.213  
7.210  
7.200  
7.195  
7.177  
7.066  
7.062  
7.045  
3.916  
3.899  
2.877  
2.860  
2.830  
2.813  
2.377  
2.372  
2.361  
2.354  
2.343  
2.338  
2.317  
2.311  
2.270  
2.264  
2.247  
2.229  
2.222  
2.210  
2.202  
2.183  
1.950  
1.938  
1.917  
1.521  
1.503  
1.484  
1.466  
1.447  
1.346  
1.328  
1.323  
0.933  
0.915  
0.896  
0.856  
0.838  
0.819

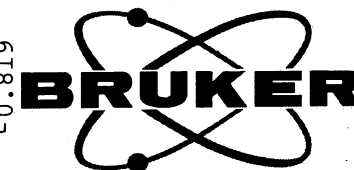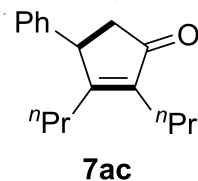

Current Data Parameters  
NAME 04\_PhCi\_4-octyne  
EXPNO 1  
PROCNO 1

F2 - Acquisition Parameters

Date\_ 20100304  
Time\_ 21.55  
INSTRUM spect  
PROBHD 5 mm PABBO BB-  
PULPROG zg30  
TD 65536  
SOLVENT CDCl3  
NS 16  
DS 2  
SWH 8223.685 Hz  
FIDRES 0.125483 Hz  
AQ 3.9846387 sec  
RG 22.6  
DW 60.800 usec  
DE 6.50 usec  
TE 294.9 K  
D1 1.00000000 sec  
TD0 1

===== CHANNEL f1 =====

NUC1 1H  
P1 14.00 usec  
PL1 -1.00 dB  
PL1W 13.34481144 W  
SFO1 400.1324710 MHz

F2 - Processing parameters

SI 32768  
SF 400.1300167 MHz  
WDW EM  
SSB 0  
LB 0.30 Hz  
GB 0  
PC 1.00

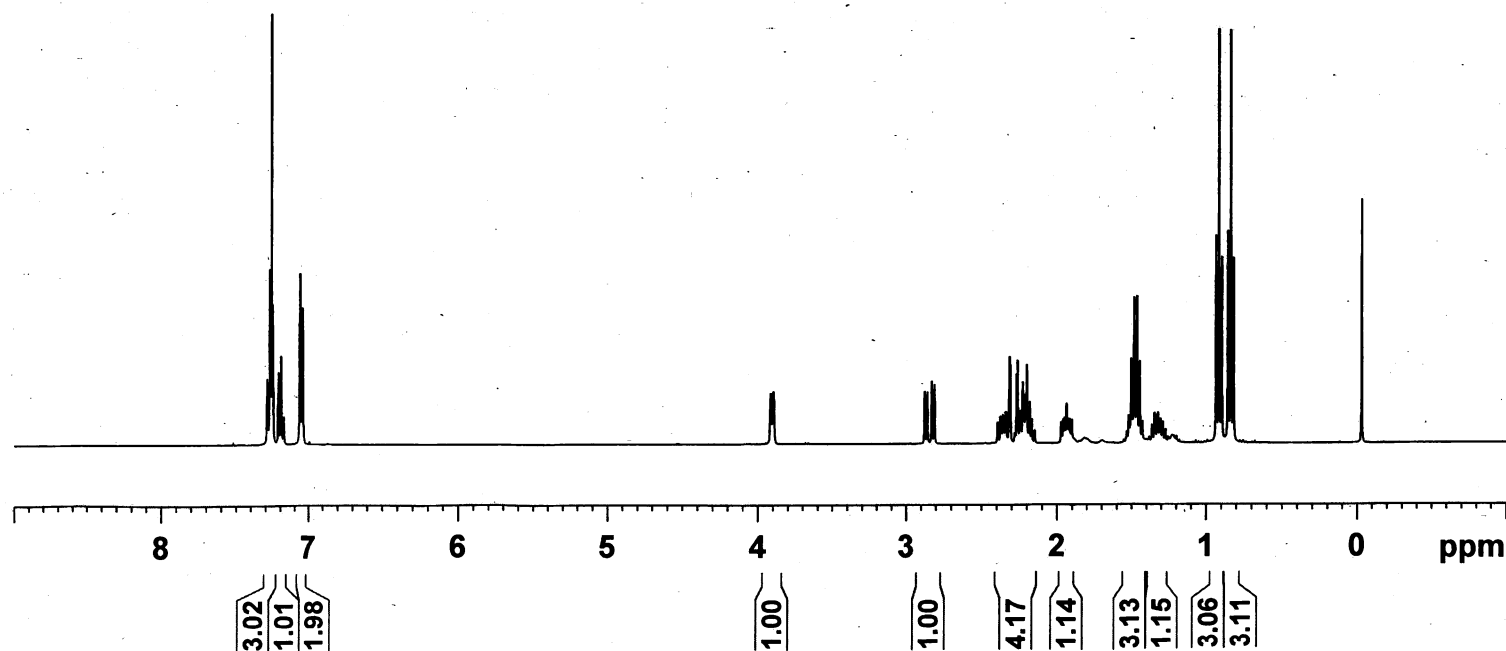

209.15

175.30

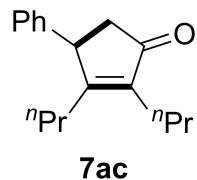

142.37  
141.35

128.91  
127.32  
126.95

77.51  
77.39  
77.19  
76.87

46.47  
44.87

30.97  
26.16  
25.31  
22.00  
20.74  
14.19  
14.17

0.01

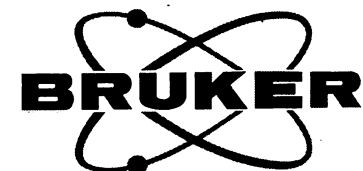

Current Data Parameters  
NAME 04\_PhCi\_4-octyne  
EXPNO 2  
PROCNO 1

F2 - Acquisition Parameters  
Date 20100304  
Time 21.56  
INSTRUM spect  
PROBHD 5 mm PABBO BB-  
PULPROG zgpg30  
TD 65536  
SOLVENT CDC13  
NS 8  
DS 4  
SWH 24038.461 Hz  
FIDRES 0.366798 Hz  
AQ 1.3631988 sec  
RG 203  
DW 20.800 usec  
DE 6.50 usec  
TE 295.2 K  
D1 2.00000000 sec  
D11 0.03000000 sec  
TD0 1

===== CHANNEL f1 =====  
NUC1 13C  
P1 10.00 usec  
PL1 2.20 dB  
PL1W 21.94663811 W  
SFO1 100.6228298 MHz

===== CHANNEL f2 =====  
CPDPRG2 waltz16  
NUC2 1H  
PCPD2 75.00 usec  
PL2 -1.00 dB  
PL12 14.20 dB  
PL13 15.00 dB  
PL2W 13.34481144 W  
PL12W 0.40300688 W  
PL13W 0.33520651 W  
SFO2 400.1316005 MHz

F2 - Processing parameters  
SI 32768  
SF 100.6127690 MHz  
WDW EM  
SSB 0  
LB 1.00 Hz  
GB 0  
PC 1.40

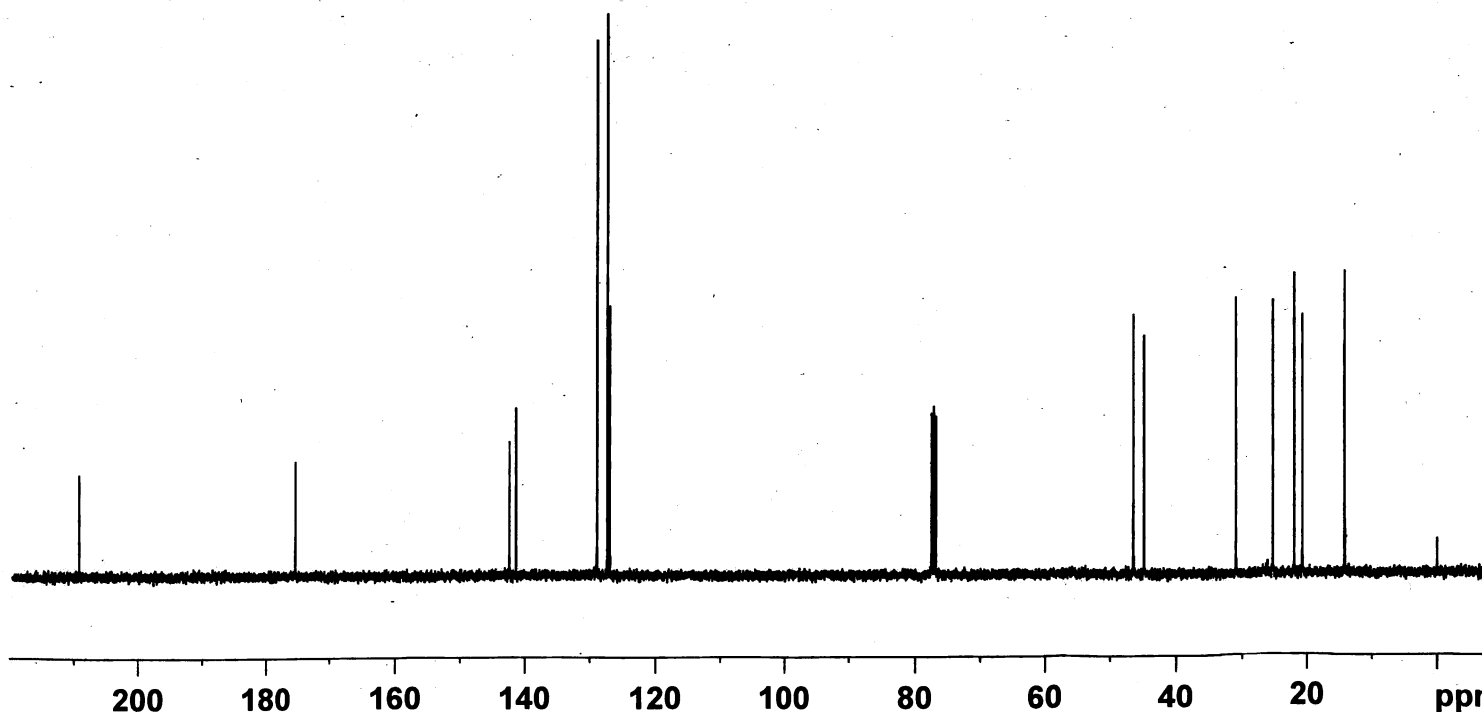

7.253  
7.235  
7.216  
7.191  
7.189  
7.180  
7.162  
7.014  
6.996  
3.863  
3.847  
2.828  
2.811  
2.781  
2.764  
2.339  
2.328  
2.320  
2.304  
2.277  
2.273  
2.230  
2.226  
2.201  
2.184  
2.165  
2.147  
1.896  
1.875  
1.864  
1.382  
1.363  
1.345  
1.325  
1.306  
1.289  
1.270  
1.252  
1.234  
1.201  
1.183  
1.166  
1.149  
1.133  
1.118  
0.904  
0.874  
0.857  
0.839  
0.819  
0.794  
0.777  
0.760

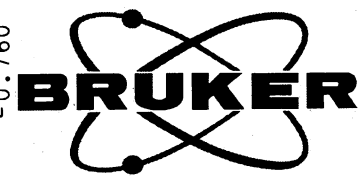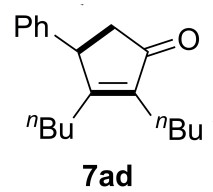

Current Data Parameters  
NAME 17\_PhCi\_5-decyne  
EXPNO 1  
PROCNO 1

F2 - Acquisition Parameters  
Date\_ 20110216  
Time\_ 8.29  
INSTRUM spect  
PROBHD 5 mm PABBO BB-  
PULPROG zg30  
TD 65536  
SOLVENT CDCl3  
NS 16  
DS 2  
SWH 8223.685 Hz  
FIDRES 0.125483 Hz  
AQ 3.9846387 sec  
RG 50.8  
DW 60.800 usec  
DE 6.50 usec  
TE 295.4 K  
D1 1.00000000 sec  
TD0 1

===== CHANNEL f1 =====  
NUC1 1H  
P1 14.00 usec  
PL1 -1.20 dB  
PL1W 13.97373390 W  
SFO1 400.1324710 MHz

F2 - Processing parameters  
SI 32768  
SF 400.1300447 MHz  
WDW EM  
SSB 0  
LB 0.30 Hz  
GB 0  
PC 1.00

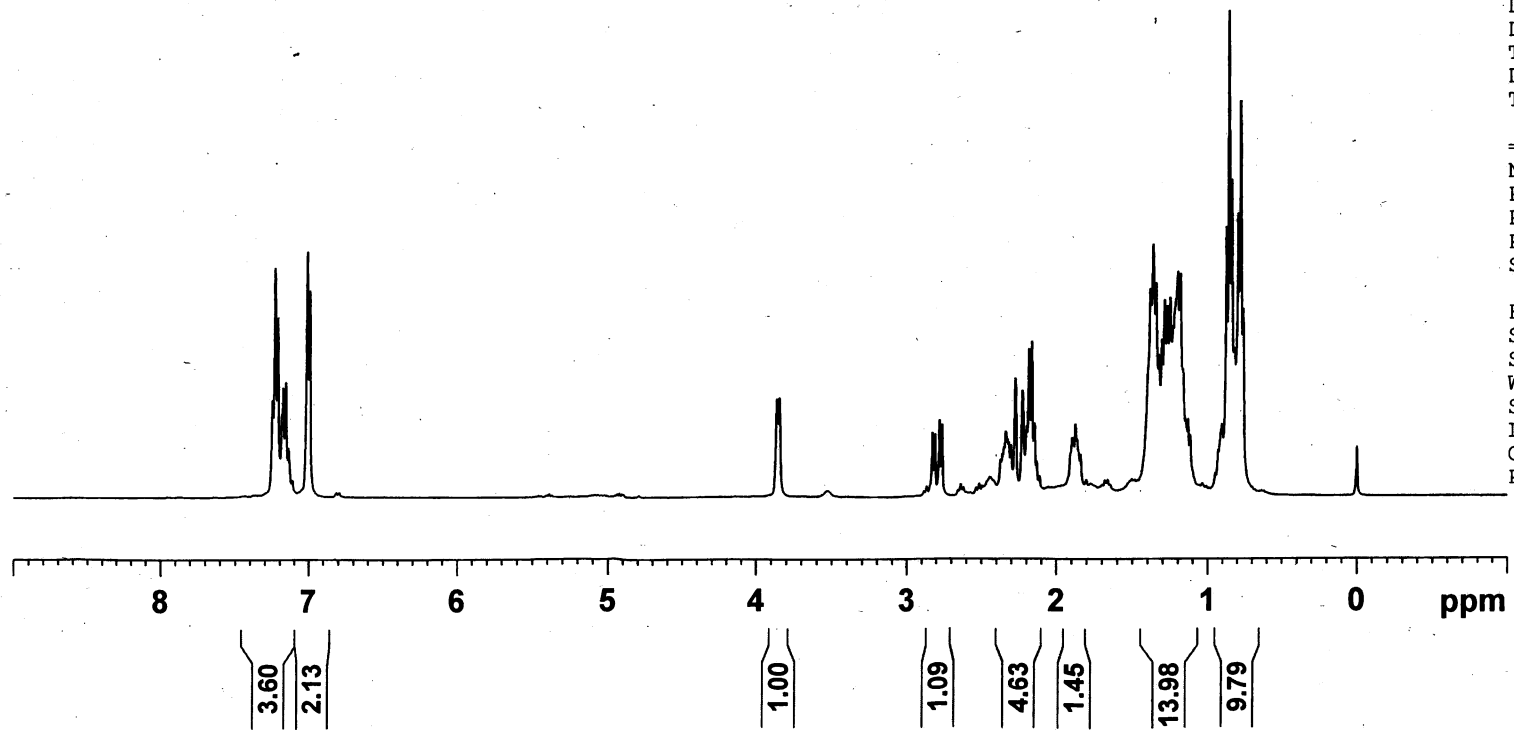

209.26

175.43

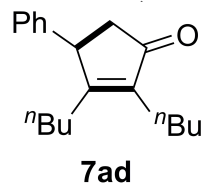

142.38  
141.41  
128.92  
128.46  
128.34  
127.37  
126.97

77.39  
77.07  
76.75

46.54  
44.87  
30.98  
29.59  
28.70  
23.61  
23.15  
22.88  
22.77  
21.83  
14.12  
13.99  
13.90  
13.83

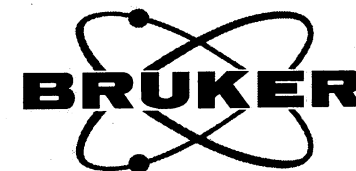

Current Data Parameters  
NAME 17\_PhCi\_5-decyne  
EXPNO 13  
PROCNO 1

F2 - Acquisition Parameters  
Date\_ 20110214  
Time 20.54  
INSTRUM spect  
PROBHD 5 mm PABBO BB-  
PULPROG zgpg30  
TD 65536  
SOLVENT CDCl3  
NS 80  
DS 4  
SWH 25252.525 Hz  
FIDRES 0.385323 Hz  
AQ 1.2976629 sec  
RG 114  
DW 19.800 usec  
DE 6.50 usec  
TE 295.6 K  
D1 2.00000000 sec  
D11 0.03000000 sec  
TD0 1

===== CHANNEL f1 =====  
NUC1 13C  
P1 10.00 usec  
PL1 2.20 dB  
PL1W 21.94663811 W  
SFO1 100.6228298 MHz

===== CHANNEL f2 =====  
CPDPRG2 waltz16  
NUC2 1H  
PCPD2 100.00 usec  
PL2 -1.20 dB  
PL12 15.88 dB  
PL13 16.00 dB  
PL2W 13.97373390 W  
PL12W 0.27372372 W  
PL13W 0.26626399 W  
SFO2 400.1316005 MHz

F2 - Processing parameters  
SI 32768  
SF 100.6127690 MHz  
WDW EM  
SSB 0  
LB 1.00 Hz  
GB 0  
PC 1.40

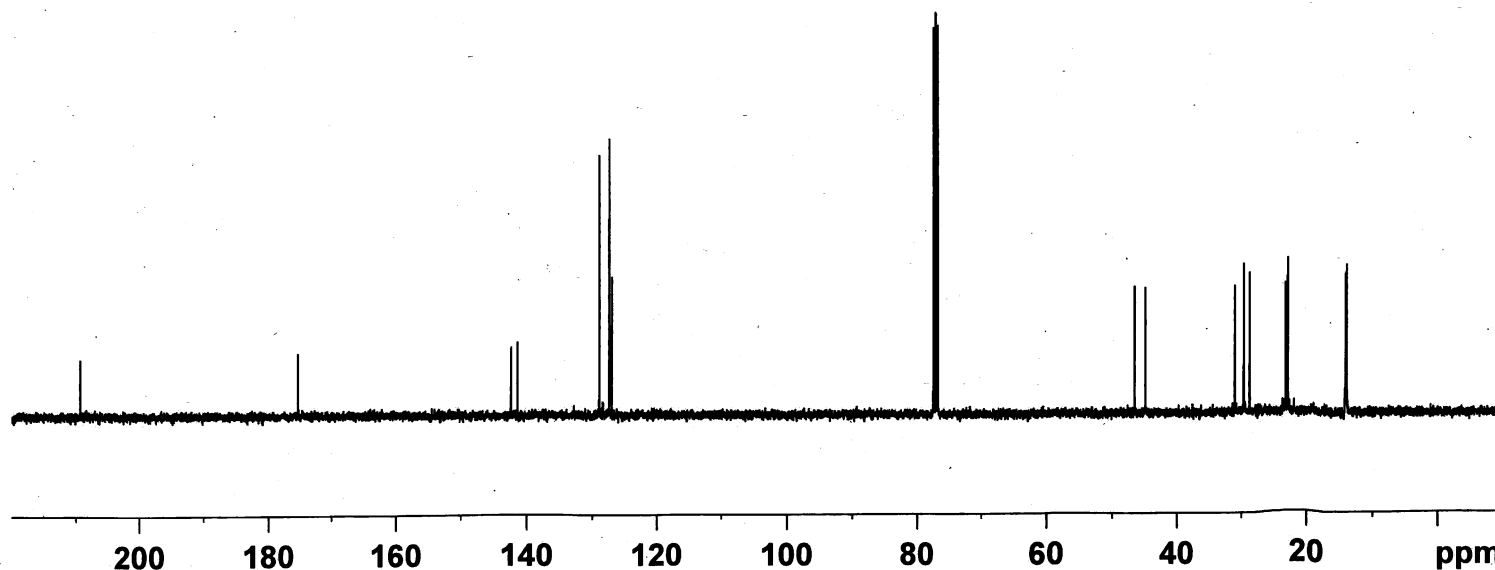

7.297  
7.294  
7.289  
7.278  
7.272  
7.227  
7.223  
7.204  
7.169  
7.165  
7.148  
7.139  
7.133  
7.128  
7.122  
7.112  
7.105  
7.100  
7.097

4.580  
4.574  
4.561  
4.556

3.261  
3.243  
3.214  
3.196  
2.655  
2.649  
2.607  
2.602

— -0.004

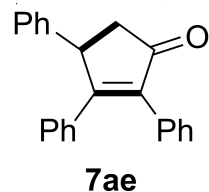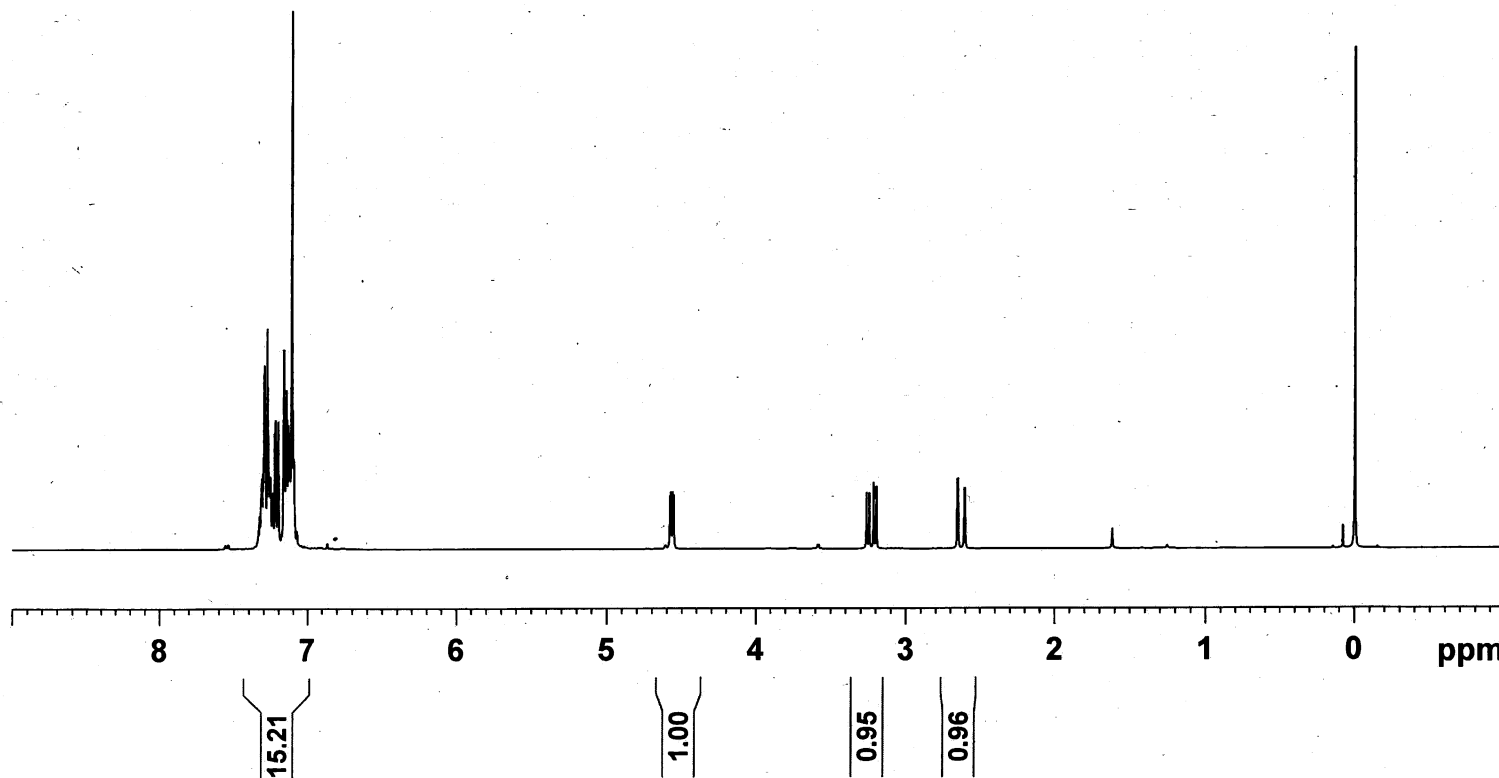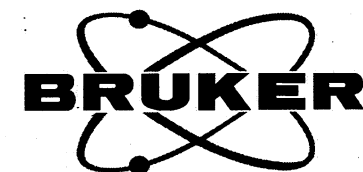

Current Data Parameters  
NAME 05\_PhCi\_tolan  
EXPNO 1  
PROCNO 1

F2 - Acquisition Parameters  
Date\_ 20100312  
Time\_ 10.37  
INSTRUM spect  
PROBHD 5 mm PABBO BB-  
PULPROG zg30  
TD 65536  
SOLVENT CDCl3  
NS 16  
DS 2  
SWH 8223.685 Hz  
FIDRES 0.125483 Hz  
AQ 3.9846387 sec  
RG 64  
DW 60.800 usec  
DE 6.50 usec  
TE 294.5 K  
D1 1.00000000 sec  
TD0 1

===== CHANNEL f1 =====  
NUC1 1H  
P1 14.00 usec  
PL1 -1.00 dB  
PL1W 13.34481144 W  
SFO1 400.1324710 MHz

F2 - Processing parameters  
SI 32768  
SF 400.1300300 MHz  
WDW EM  
SSB 0  
LB 0.30 Hz  
GB 0  
PC 1.00

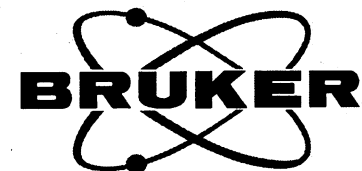

Current Data Parameters  
 NAME 05\_PhCi\_tolan  
 EXPNO 2  
 PROCNO 1

F2 - Acquisition Parameters  
 Date 20100312  
 Time 10.43  
 INSTRUM spect  
 PROBHD 5 mm PABBO BB-  
 PULPROG zgpg30  
 TD 65536  
 SOLVENT CDC13  
 NS 80  
 DS 4  
 SWH 24038.461 Hz  
 FIDRES 0.366798 Hz  
 AQ 1.3631988 sec  
 RG 203  
 DW 20.800 usec  
 DE 6.50 usec  
 TE 295.8 K  
 D1 2.00000000 sec  
 D11 0.03000000 sec  
 TD0 1

===== CHANNEL f1 =====  
 NUC1 13C  
 P1 10.00 usec  
 PL1 2.20 dB  
 PL1W 21.94663811 W  
 SFO1 100.6228298 MHz

===== CHANNEL f2 =====  
 CPDPRG2 waltz16  
 NUC2 1H  
 PCPD2 75.00 usec  
 PL2 -1.00 dB  
 PL12 14.20 dB  
 PL13 15.00 dB  
 PL2W 13.34481144 W  
 PL12W 0.40300688 W  
 PL13W 0.33520651 W  
 SFO2 400.1316005 MHz

F2 - Processing parameters  
 SI 32768  
 SF 100.6127778 MHz  
 WDW EM  
 SSB 0  
 LB 1.00 Hz  
 GB 0  
 PC 1.40

206.65

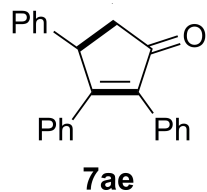

170.21  
 142.15  
 140.75  
 134.77  
 131.78  
 129.62  
 129.22  
 128.91  
 128.71  
 128.55  
 128.36  
 128.15  
 127.96  
 127.74  
 127.41  
 127.13  
 126.87

77.36  
 77.24  
 77.04  
 76.72  
 57.06  
 47.23  
 45.96

-0.00

129.623  
 129.215  
 128.908  
 128.712  
 128.546  
 128.357  
 128.150  
 127.961  
 127.736  
 127.412  
 127.128  
 126.873

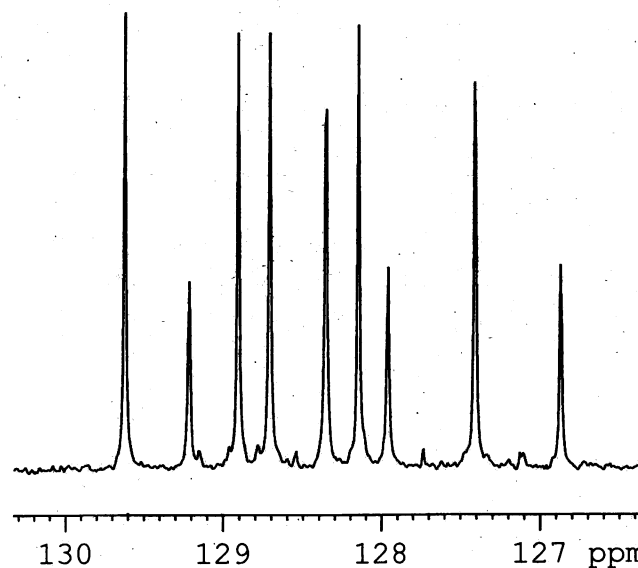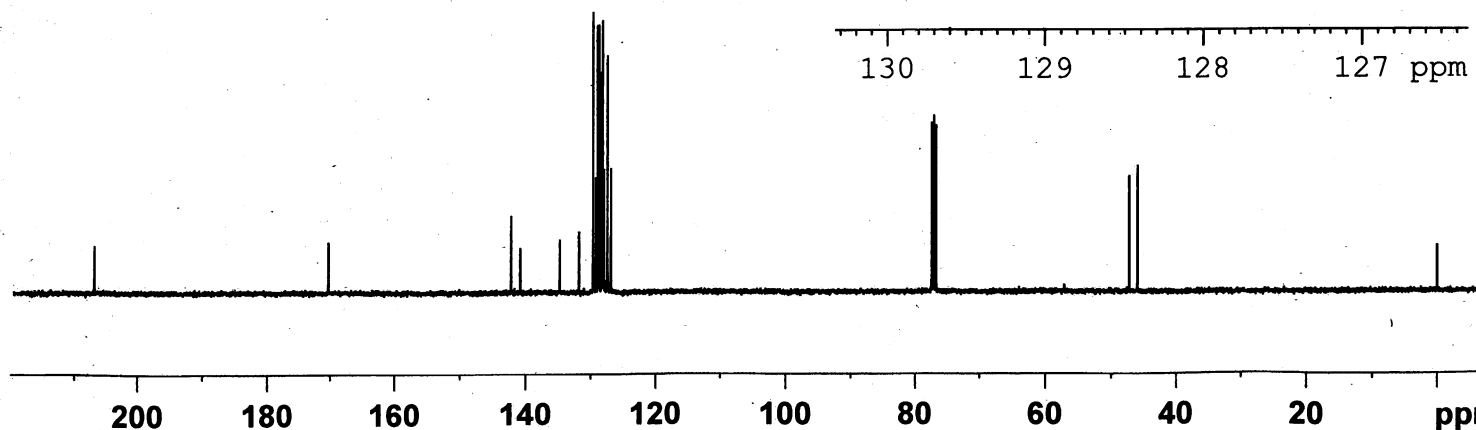

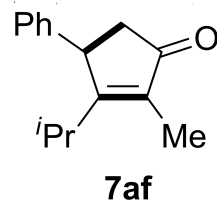

7.275  
7.259  
7.243  
7.210  
7.207  
7.195  
7.190  
7.099  
7.083

3.966  
3.954  
2.877  
2.860  
2.829  
2.812  
2.786  
2.769  
2.755  
2.319  
2.272  
1.821  
1.070  
1.059  
1.055  
1.053  
0.802  
0.790  
0.787  
0.785

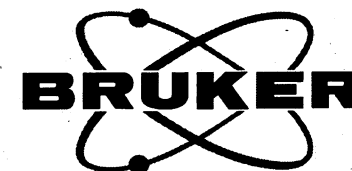

Current Data Parameters  
NAME 16\_PhCi\_4-methyl-2-pentyne  
EXPNO 1  
PROCNO 1

F2 - Acquisition Parameters  
Date 20110214  
Time 21.37  
INSTRUM spect  
PROBHD 5 mm PABBO BB-  
PULPROG zg30  
TD 65536  
SOLVENT CDCl3  
NS 16  
DS 2  
SWH 8223.685 Hz  
FIDRES 0.125483 Hz  
AQ 3.9846387 sec  
RG 50.8  
DW 60.800 usec  
DE 6.50 usec  
TE 294.9 K  
D1 1.00000000 sec  
TD0 1

===== CHANNEL f1 =====  
NUC1 1H  
P1 14.00 usec  
PL1 -1.20 dB  
PL1W 13.97373390 W  
SFO1 400.1324710 MHz

F2 - Processing parameters  
SI 32768  
SF 400.1300251 MHz  
WDW EM  
SSB 0  
LB 0.30 Hz  
GB 0  
PC 1.00

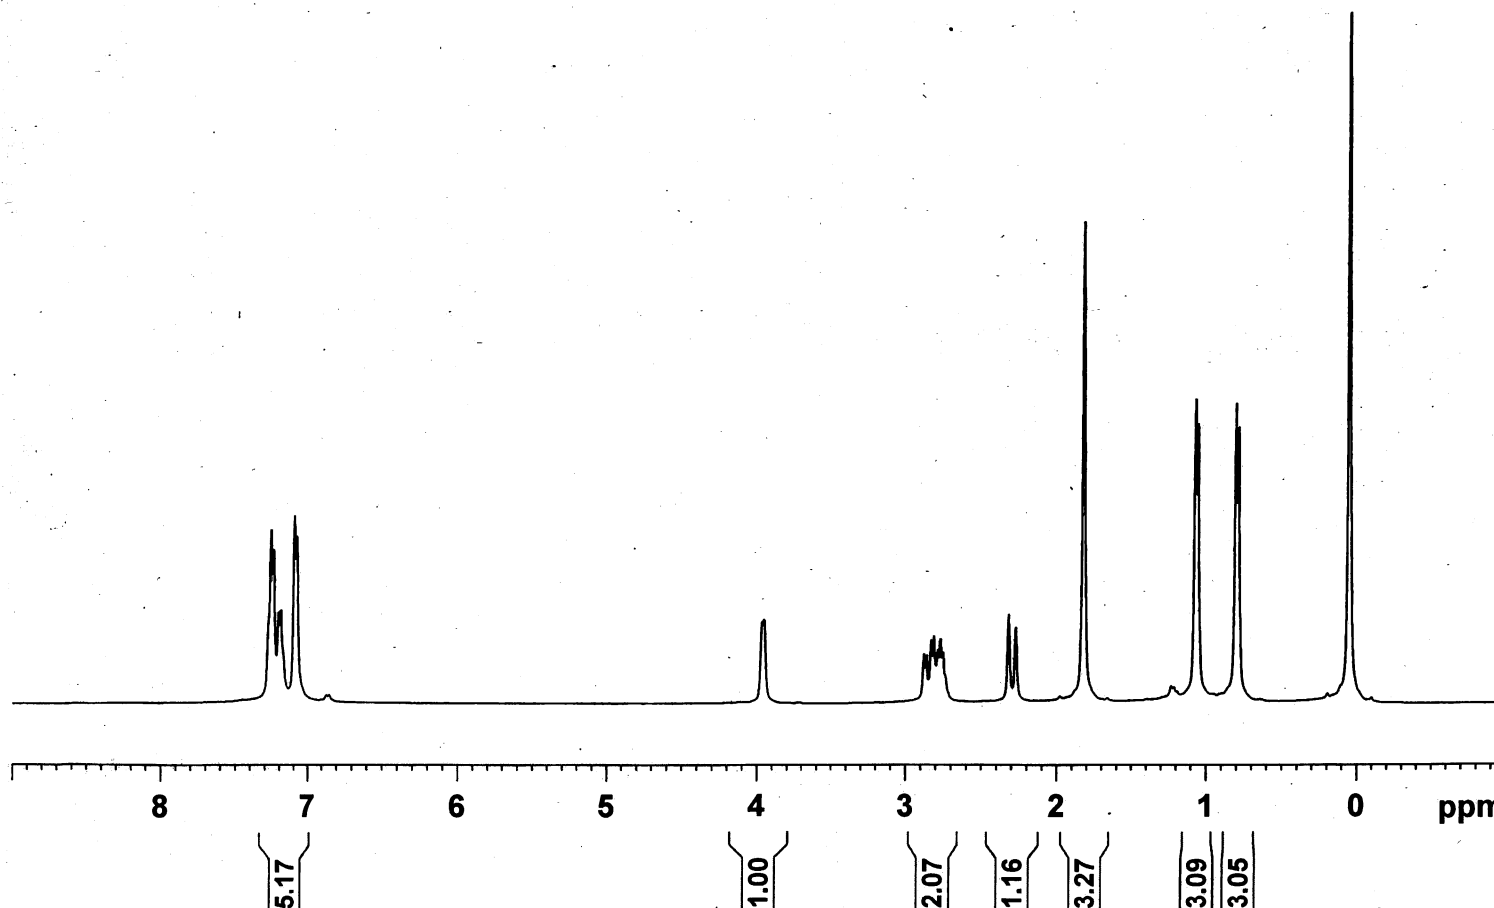

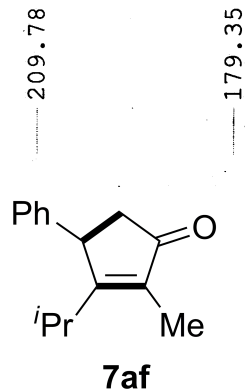

142.76  
136.04  
128.63  
127.56  
126.86

77.31  
76.99  
76.67

46.45  
45.25

30.35

20.84  
19.75

8.41

0.95

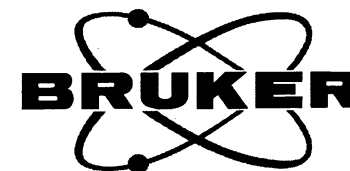

Current Data Parameters  
NAME 16\_PhCl\_4-methyl-2-pentyne  
EXPNO 13  
PROCNO 1

F2 - Acquisition Parameters  
Date 20110214  
Time 21.51  
INSTRUM spect  
PROBHD 5 mm PABBO BB-  
PULPROG zgpg30  
TD 65536  
SOLVENT CDCl3  
NS 256  
DS 4  
SWH 24038.461 Hz  
FIDRES 0.366798 Hz  
AQ 1.3631988 sec  
RG 114  
DW 20.800 usec  
DE 6.50 usec  
TE 296.1 K  
D1 2.00000000 sec  
D11 0.03000000 sec  
TD0 1

===== CHANNEL f1 =====  
NUC1 13C  
P1 10.00 usec  
PL1 2.20 dB  
PL1W 21.94663811 W  
SFO1 100.6228298 MHz

===== CHANNEL f2 =====  
CPDPRG2 waltz16  
NUC2 1H  
PCPD2 100.00 usec  
PL2 -1.20 dB  
PL12 15.88 dB  
PL13 16.00 dB  
PL2W 13.97373390 W  
PL12W 0.27372372 W  
PL13W 0.26626399 W  
SFO2 400.1316005 MHz

F2 - Processing parameters  
SI 32768  
SF 100.6127792 MHz  
WDW EM  
SSB 0  
LB 1.00 Hz  
GB 0  
PC 1.40

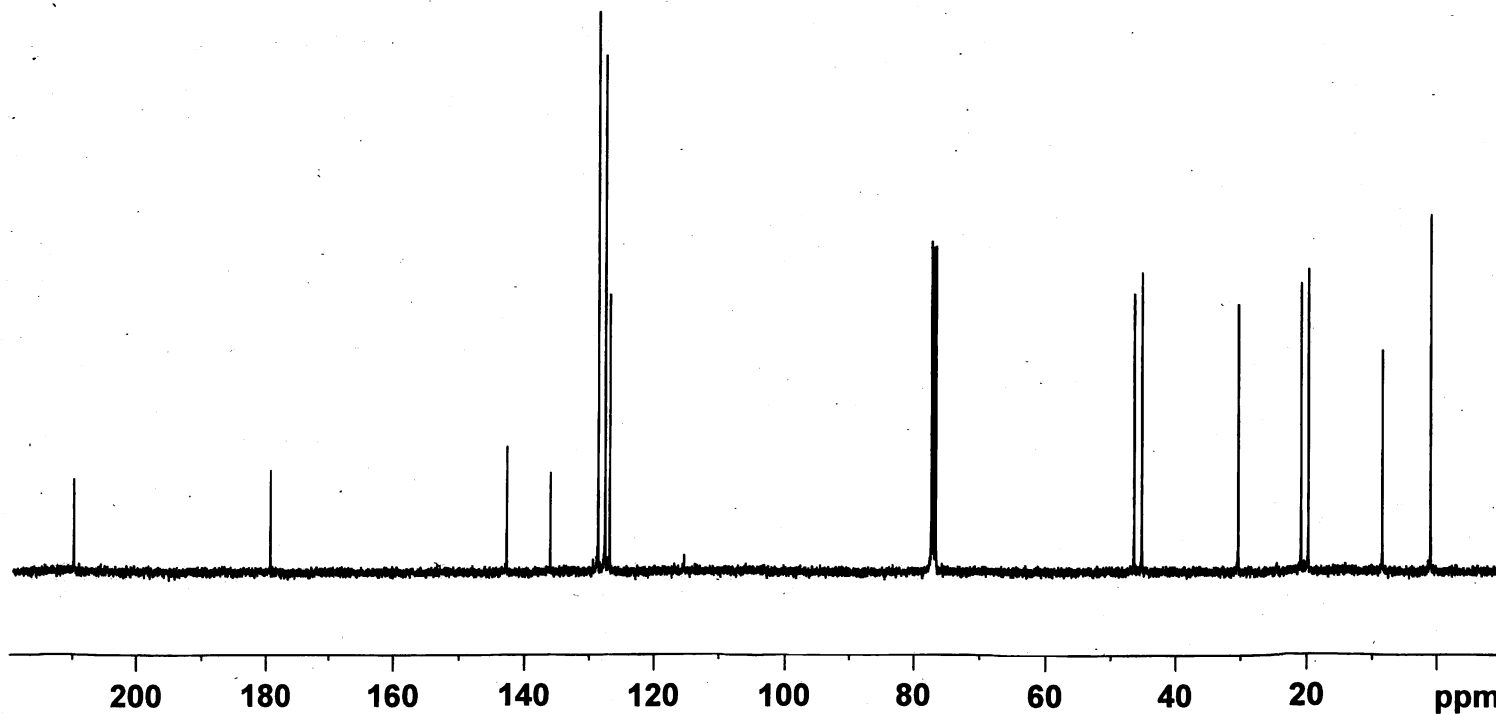

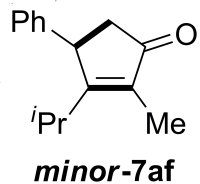

7.251  
 7.234  
 7.215  
 7.180  
 7.177  
 7.174  
 7.159  
 7.007  
 7.004  
 6.986

3.674  
 3.657  
 2.786  
 2.770  
 2.752  
 2.737  
 2.720  
 2.242  
 2.237  
 2.195  
 2.190  
 1.753  
 1.181  
 1.163  
 1.158  
 1.140

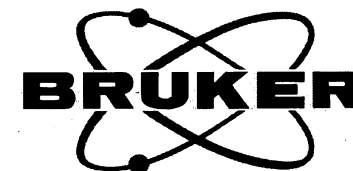

Current Data Parameters  
 NAME 16\_PhCl\_4-methyl-2-pentyne  
 EXPNO 31  
 PROCNO 1

F2 - Acquisition Parameters  
 Date\_ 20110214  
 Time 21.01  
 INSTRUM spect  
 PROBHD 5 mm PABBO BB-  
 PULPROG zg30  
 TD 65536  
 SOLVENT CDCl3  
 NS 16  
 DS 2  
 SWH 8223.685 Hz  
 FIDRES 0.125483 Hz  
 AQ 3.9846387 sec  
 RG 50.8  
 DW 60.800 usec  
 DE 6.50 usec  
 TE 294.7 K  
 D1 1.00000000 sec  
 TD0 1

===== CHANNEL f1 =====  
 NUC1 1H  
 P1 14.00 usec  
 PL1 -1.20 dB  
 PL1W 13.97373390 W  
 SFO1 400.1324710 MHz

F2 - Processing parameters  
 SI 32768  
 SF 400.1300475 MHz  
 WDW EM  
 SSB 0  
 LB 0.30 Hz  
 GB 0  
 PC 1.00

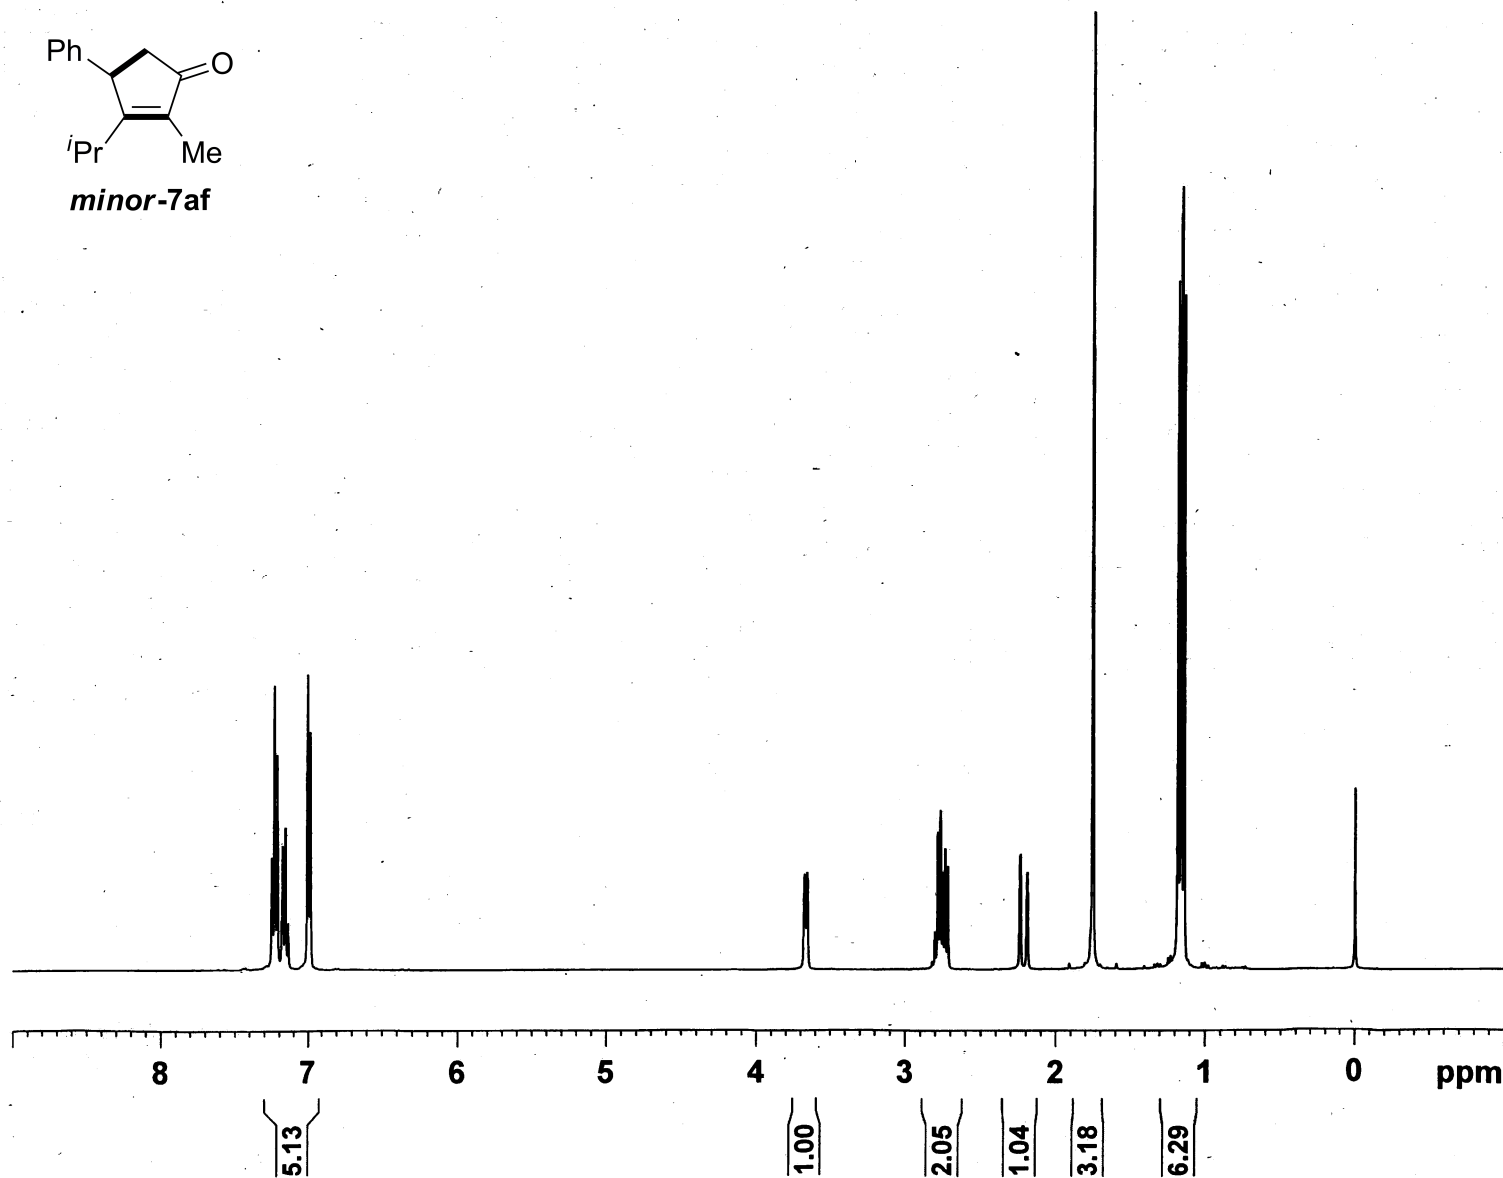

8

6

5

4

3

2

1

0

ppm

5.13

1.00

2.05

1.04

3.18

6.29

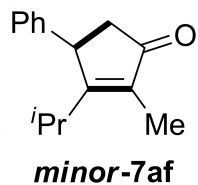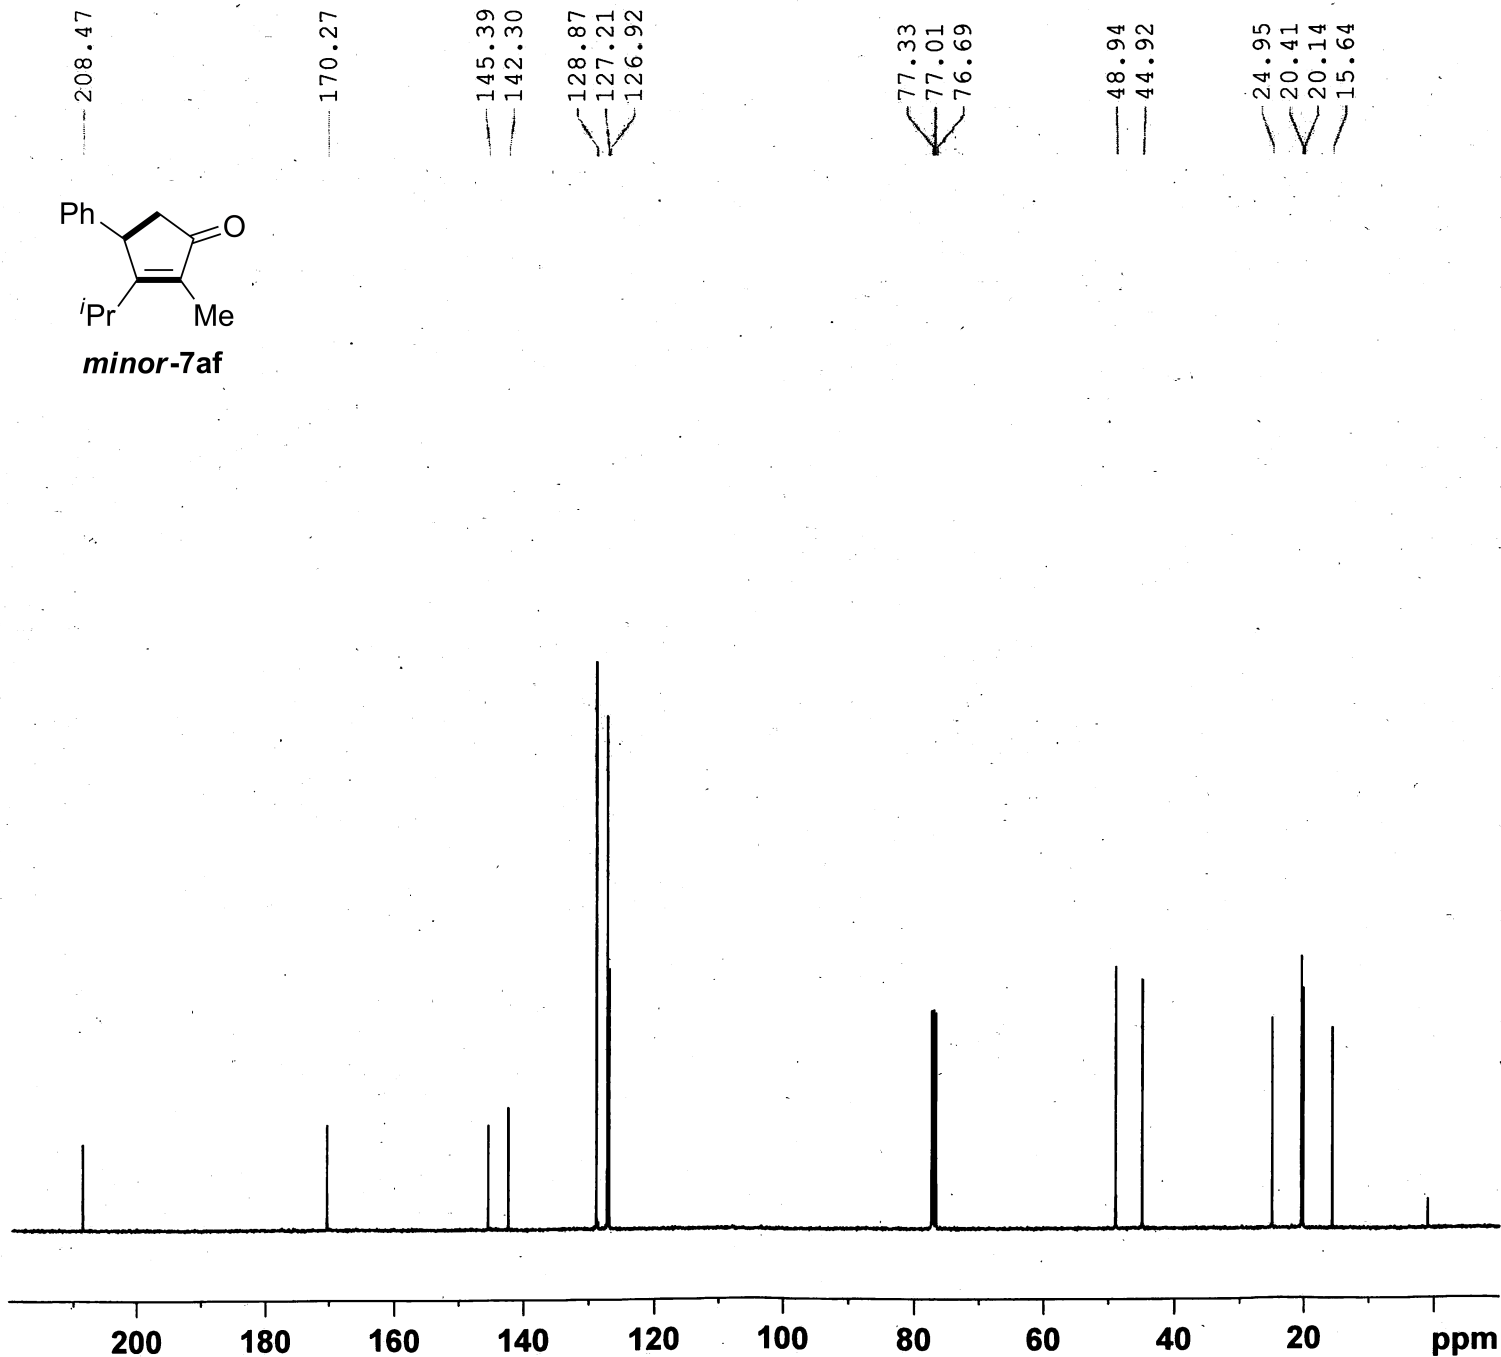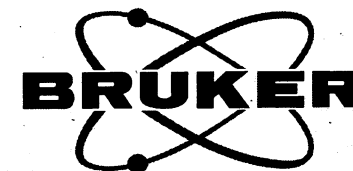

Current Data Parameters  
 NAME 16\_PhCi\_4-methyl-2-pentyne  
 EXPNO 313  
 PROCNO 1

F2 - Acquisition Parameters  
 Date\_ 20110214  
 Time 21.30  
 INSTRUM spect  
 PROBHD 5 mm PABBO BB-  
 PULPROG zgpg30  
 TD 65536  
 SOLVENT CDCl3  
 NS 476  
 DS 4  
 SWH 24038.461 Hz  
 FIDRES 0.366798 Hz  
 AQ 1.3631988 sec  
 RG 114  
 DW 20.800 usec  
 DE 6.50 usec  
 TE 295.8 K  
 D1 2.00000000 sec  
 D11 0.03000000 sec  
 TDO 1

===== CHANNEL f1 =====  
 NUC1 13C  
 P1 10.00 usec  
 PL1 2.20 dB  
 PL1W 21.94663811 W  
 SFO1 100.6228298 MHz

===== CHANNEL f2 =====  
 CPDPRG2 waltz16  
 NUC2 1H  
 PCPD2 100.00 usec  
 PL2 -1.20 dB  
 PL12 15.88 dB  
 PL13 16.00 dB  
 PL2W 13.97373390 W  
 PL12W 0.27372372 W  
 PL13W 0.26626399 W  
 SFO2 400.1316005 MHz

F2 - Processing parameters  
 SI 32768  
 SF 100.6127778 MHz  
 WDW EM  
 SSB 0  
 LB 1.00 Hz  
 GB 0  
 PC 1.40

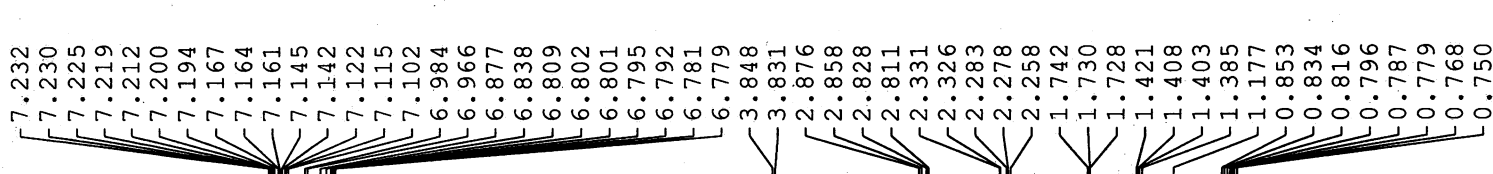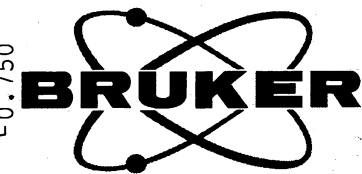

Current Data Parameters  
NAME 06\_PhCi\_2-hexyne  
EXPNO 1  
PROCNO 1

# F2 - Acquisition Parameters

Date\_ 20100324  
Time 14.51  
INSTRUM spect  
PROBHD 5 mm PABBO BB-  
PULPROG zg30  
TD 65536  
SOLVENT CDCl3  
NS 16  
DS 2  
SWH 8223.685 Hz  
FIDRES 0.125483 Hz  
AQ 3.9846387 sec  
RG 40.3  
DW 60.800 usec  
DE 6.50 usec  
TE 294.5 K  
D1 1.00000000 sec  
TD0 1

# ===== CHANNEL f1 =====

NUC1 1H  
P1 14.00 usec  
PL1 -1.00 dB  
PL1W 13.34481144 W  
SFO1 400.1324710 MHz

# F2 - Processing parameters

SI 32768  
SF 400.1300638 MHz  
WDW EM  
SSB 0  
LB 0.30 Hz  
GB 0  
PC 1.00

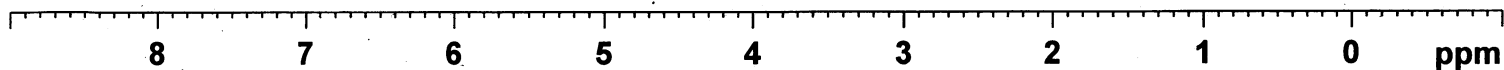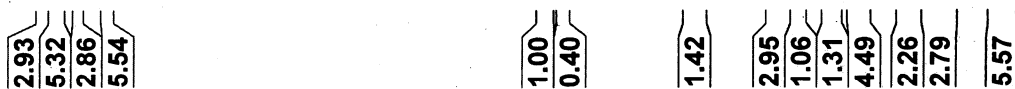

PhCi + 2-hexyne

209.39  
208.81  
175.17  
171.85

142.18  
141.27  
137.18  
128.93  
128.87  
127.40  
127.29  
127.00  
126.98

77.38  
77.27  
77.06  
76.75

49.08  
46.90  
44.67  
31.11  
25.16  
22.72  
21.68  
20.53  
15.54  
14.08  
14.04  
8.32  
-0.00

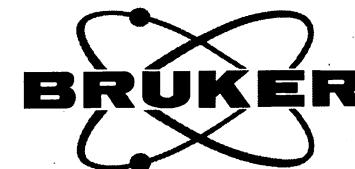

Current Data Parameters  
NAME 06\_PhCi\_2-hexyne  
EXPNO 2  
PROCNO 1

F2 - Acquisition Parameters  
Date 20100325  
Time 14.17  
INSTRUM spect  
PROBHD 5 mm PABBO BB-  
PULPROG zgpg30  
TD 65536  
SOLVENT CDC13  
NS 196  
DS 4  
SWH 25252.525 Hz  
FIDRES 0.385323 Hz  
AQ 1.2976629 sec  
RG 203  
DW 19.800 usec  
DE 6.50 usec  
TE 295.3 K  
D1 2.00000000 sec  
D11 0.03000000 sec  
TD0 1

===== CHANNEL f1 =====  
NUC1 13C  
P1 10.00 usec  
PL1 2.20 dB  
PL1W 21.94663811 W  
SFO1 100.6228298 MHz

===== CHANNEL f2 =====  
CPDPRG2 waltz16  
NUC2 1H  
PCPD2 75.00 usec  
PL2 -1.00 dB  
PL12 14.20 dB  
PL13 15.00 dB  
PL2W 13.34481144 W  
PL12W 0.40300688 W  
PL13W 0.33520651 W  
SFO2 400.1316005 MHz

F2 - Processing parameters  
SI 32768  
SF 100.6127714 MHz  
WDW EM  
SSB 0  
LB 1.00 Hz  
GB 0  
PC 1.40

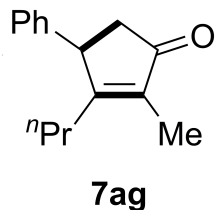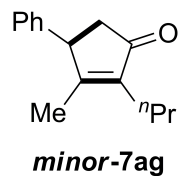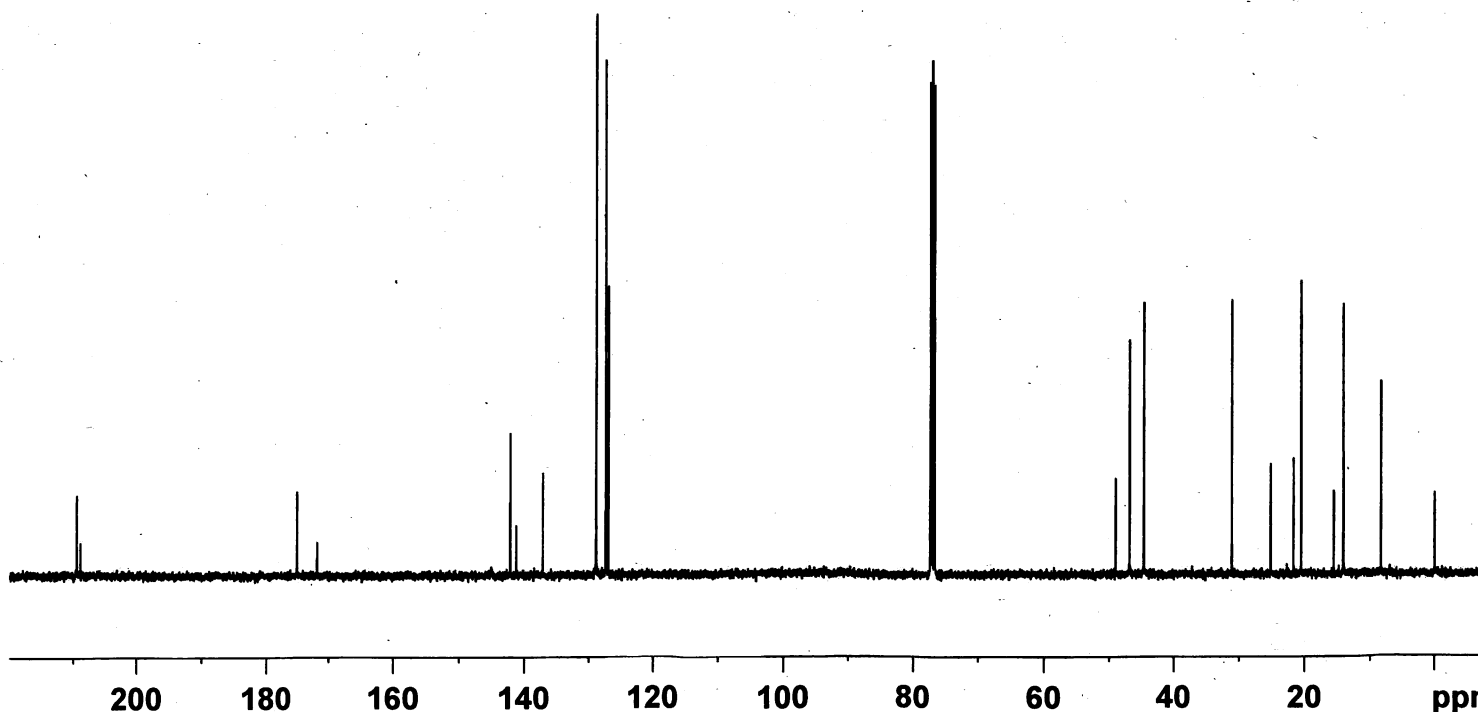

7.431  
7.412  
7.399  
7.394  
7.374  
7.370  
7.365  
7.353  
7.350  
7.340  
7.335  
7.332  
7.318  
7.313  
7.301  
7.297  
7.287  
7.282  
7.270  
7.267  
7.257  
7.252  
7.246  
7.236  
7.233  
7.215  
7.176  
7.173  
7.155  
7.068  
7.064  
7.047  
3.941  
3.925  
3.074  
3.056  
3.041  
3.027  
3.009  
2.552  
2.546  
2.505  
2.499  
2.002  
1.998  
1.932  
1.853  
1.415  
1.263  
0.878  
0.008  
-0.000  
-0.008

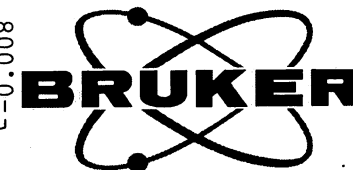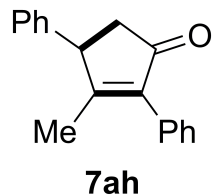

Current Data Parameters  
NAME 07\_PhCi\_1-Ph-3-propyne  
EXPNO 1  
PROCNO 1

F2 - Acquisition Parameters  
Date\_ 20100310  
Time\_ 15.35  
INSTRUM spect  
PROBHD 5 mm PABBO BB-  
PULPROG zg30  
TD 65536  
SOLVENT CDC13  
NS 16  
DS 2  
SWH 8223.685 Hz  
FIDRES 0.125483 Hz  
AQ 3.9846387 sec  
RG 32  
DW 60.800 usec  
DE 6.50 usec  
TE 294.7 K  
D1 1.00000000 sec  
TD0 1

===== CHANNEL f1 =====  
NUC1 1H  
P1 14.00 usec  
PL1 -1.00 dB  
PL1W 13.34481144 W  
SFO1 400.1324710 MHz

F2 - Processing parameters  
SI 32768  
SF 400.1300346 MHz  
WDW EM  
SSB 0  
LB 0.30 Hz  
GB 0  
PC 1.00

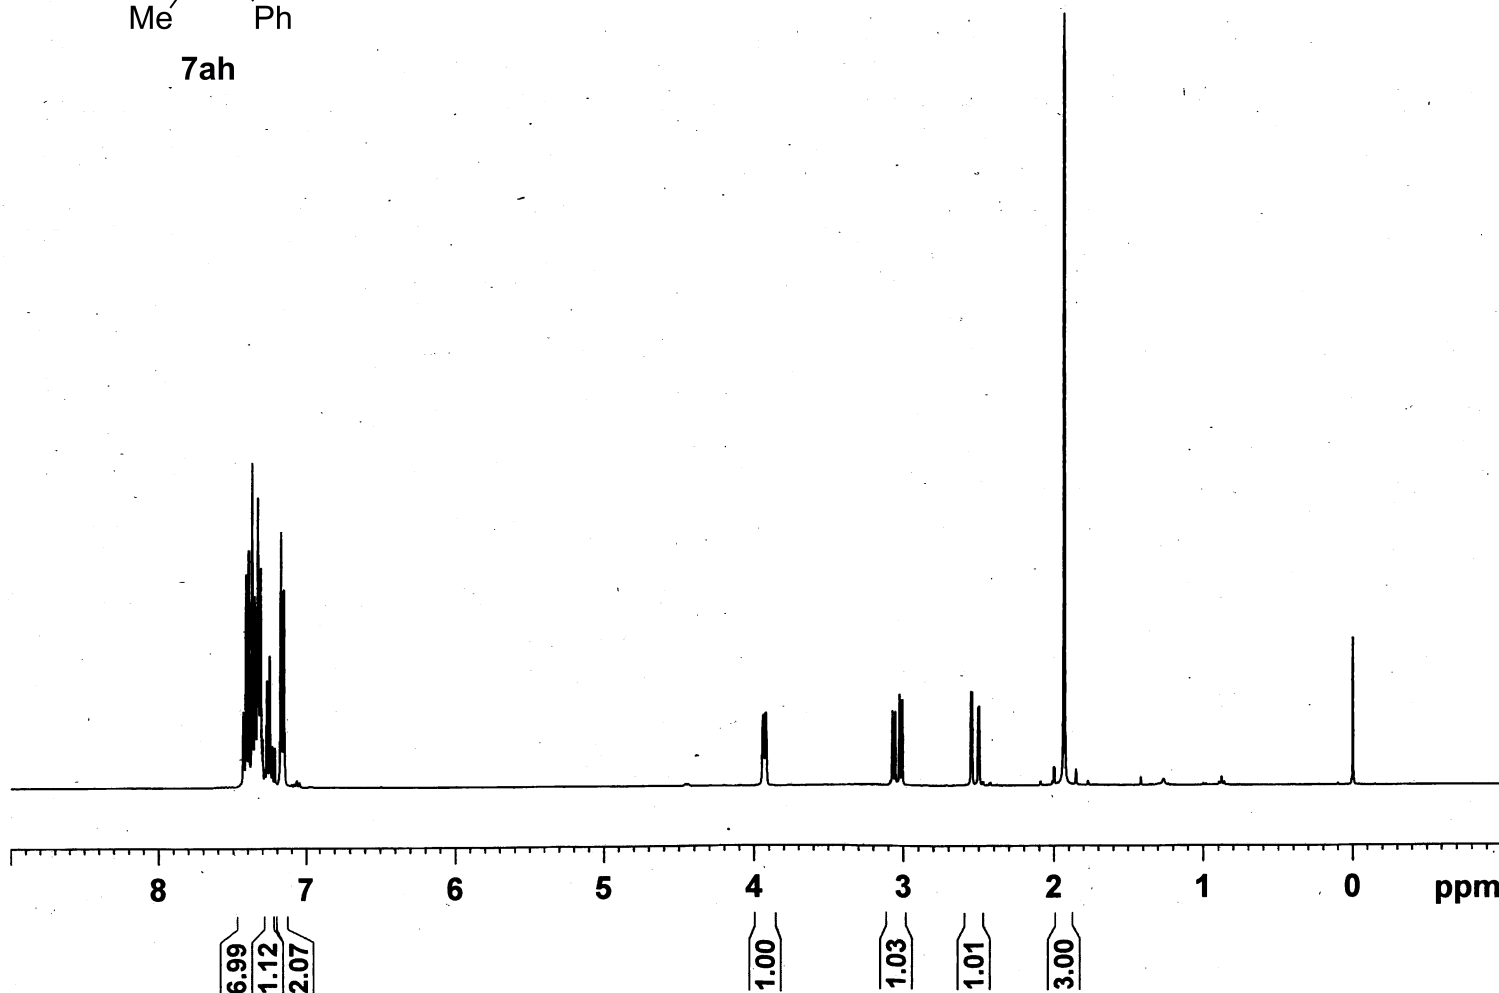

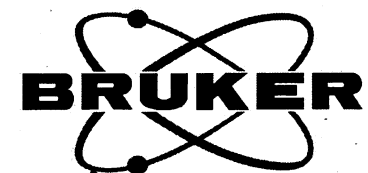

Current Data Parameters  
 NAME 07\_PhCi\_1-Ph-3-propyne  
 EXPNO 2  
 PROCNO 1

F2 - Acquisition Parameters  
 Date\_ 20100310  
 Time\_ 15.31  
 INSTRUM spect  
 PROBHD 5 mm PABBO BB-  
 PULPROG zgpg30  
 TD 65536  
 SOLVENT CDCl3  
 NS 54  
 DS 4  
 SWH 24038.461 Hz  
 FIDRES 0.366798 Hz  
 AQ 1.3631988 sec  
 RG 203  
 DW 20.800 usec  
 DE 6.50 usec  
 TE 295.7 K  
 D1 2.00000000 sec  
 D11 0.03000000 sec  
 TD0 1

===== CHANNEL f1 =====  
 NUC1 13C  
 P1 10.00 usec  
 PL1 2.20 dB  
 PL1W 21.94663811 W  
 SFO1 100.6228298 MHz

===== CHANNEL f2 =====  
 CPDPRG2 waltz16  
 NUC2 1H  
 PCPD2 75.00 usec  
 PL2 -1.00 dB  
 PL12 14.20 dB  
 PL13 15.00 dB  
 PL2W 13.34481144 W  
 PL12W 0.40300688 W  
 PL13W 0.33520651 W  
 SFO2 400.1316005 MHz

F2 - Processing parameters  
 SI 32768  
 SF 100.6127690 MHz  
 WDW EM  
 SSB 0  
 LB 1.00 Hz  
 GB 0  
 PC 1.40

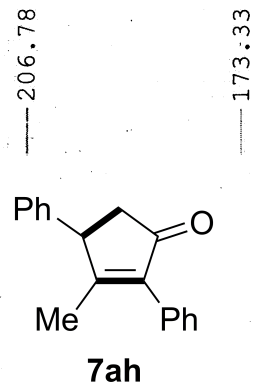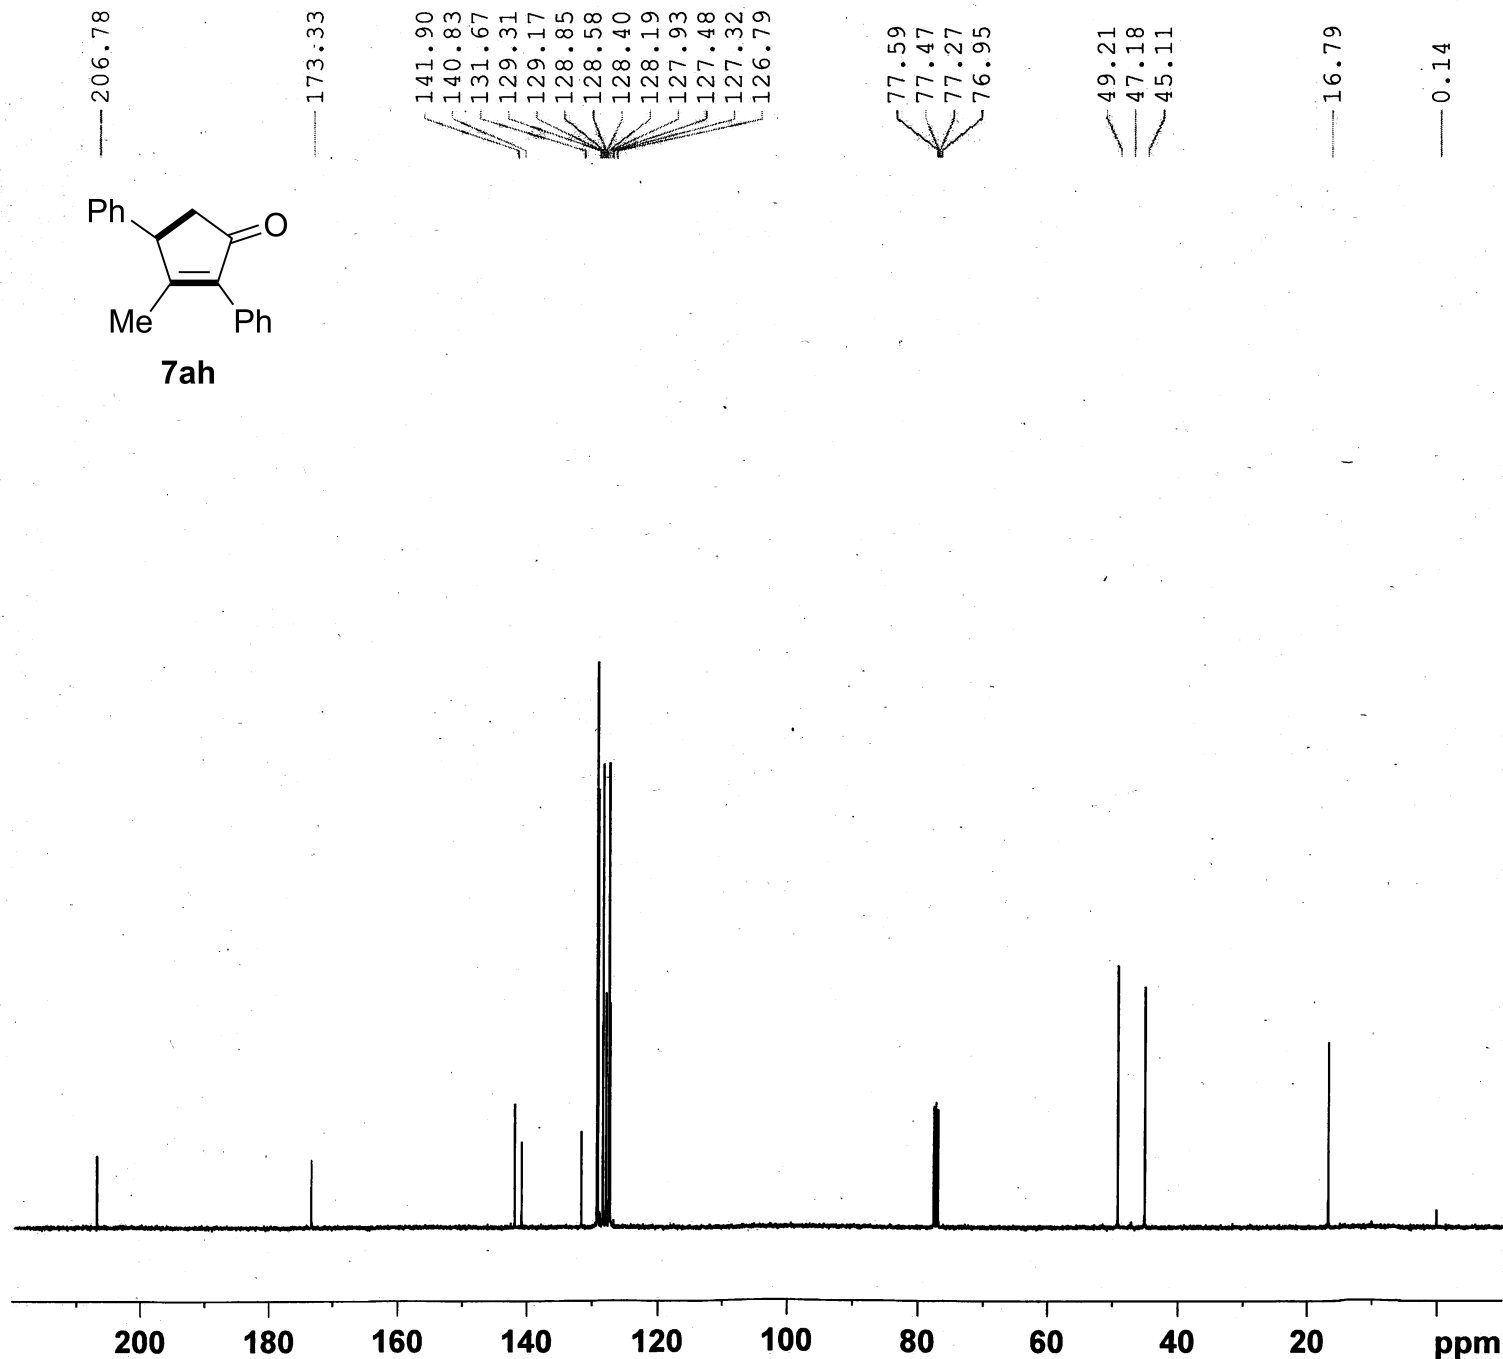

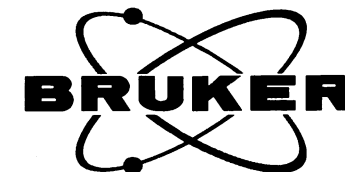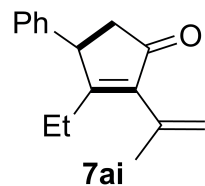

7.532  
7.514  
7.495  
7.458  
7.446  
7.440  
7.319  
7.299

5.431  
5.428  
5.053

4.212  
4.195

3.141  
3.123  
3.094  
3.076  
2.795  
2.777  
2.759  
2.742  
2.724  
2.705  
2.594  
2.589  
2.547  
2.170  
2.138

1.199  
1.180  
1.161

NAME tani (451-500)  
EXPNO 46603  
PROCNO 1  
Date\_ 20100518  
Time\_ 0.34  
INSTRUM spect  
PROBHD 5 mm PABBO BB-  
PULPROG zg30  
TD 65536  
SOLVENT CDCl3  
NS 16  
DS 2  
SWH 8223.685 Hz  
FIDRES 0.125483 Hz  
AQ 3.9846387 sec  
RG 101  
DW 60.800 usec  
DE 6.50 usec  
TE 297.1 K  
D1 1.00000000 sec  
TD0 1

===== CHANNEL f1 =====  
NUC1 1H  
P1 14.00 usec  
PL1 -1.00 dB  
PL1W 13.34481144 W  
SFO1 400.1324710 MHz  
SI 32768  
SF 400.1299403 MHz  
WDW EM  
SSB 0  
LB 0.30 Hz  
GB 0  
PC 1.00

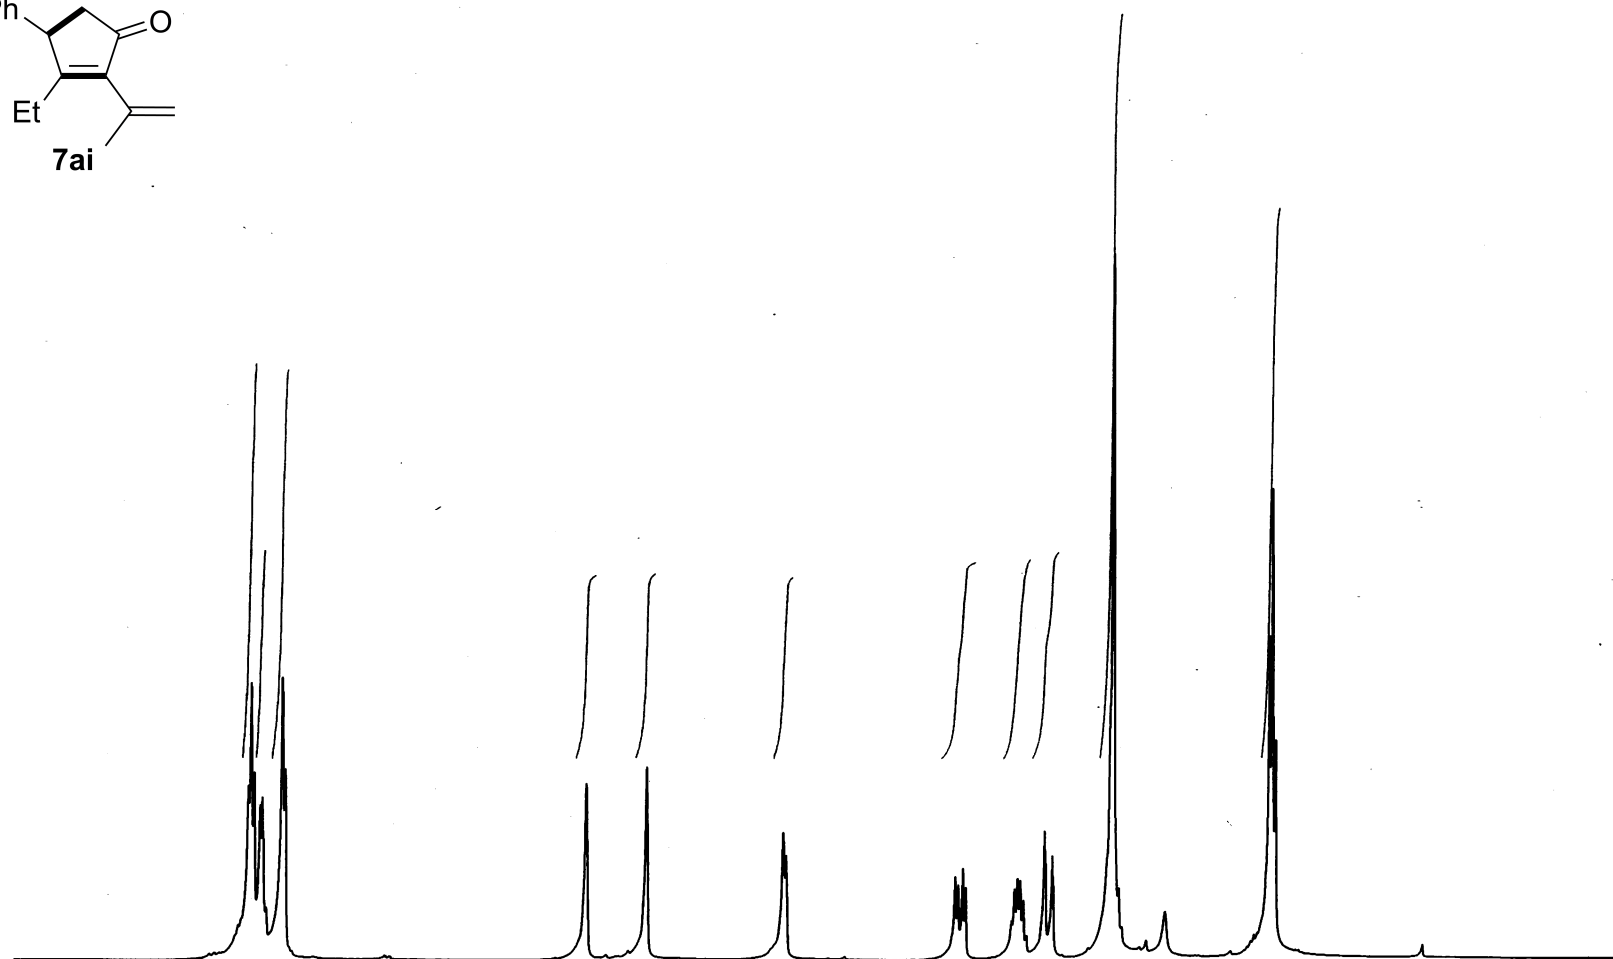

2.213  
1.152  
2.142

1.000  
1.010

0.990

1.070  
1.091  
1.132

4.096

3.031

8 7 6 5 4 3 2 1 0 ppm

PhCi + eneyne

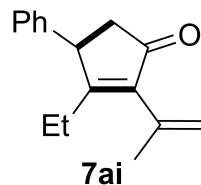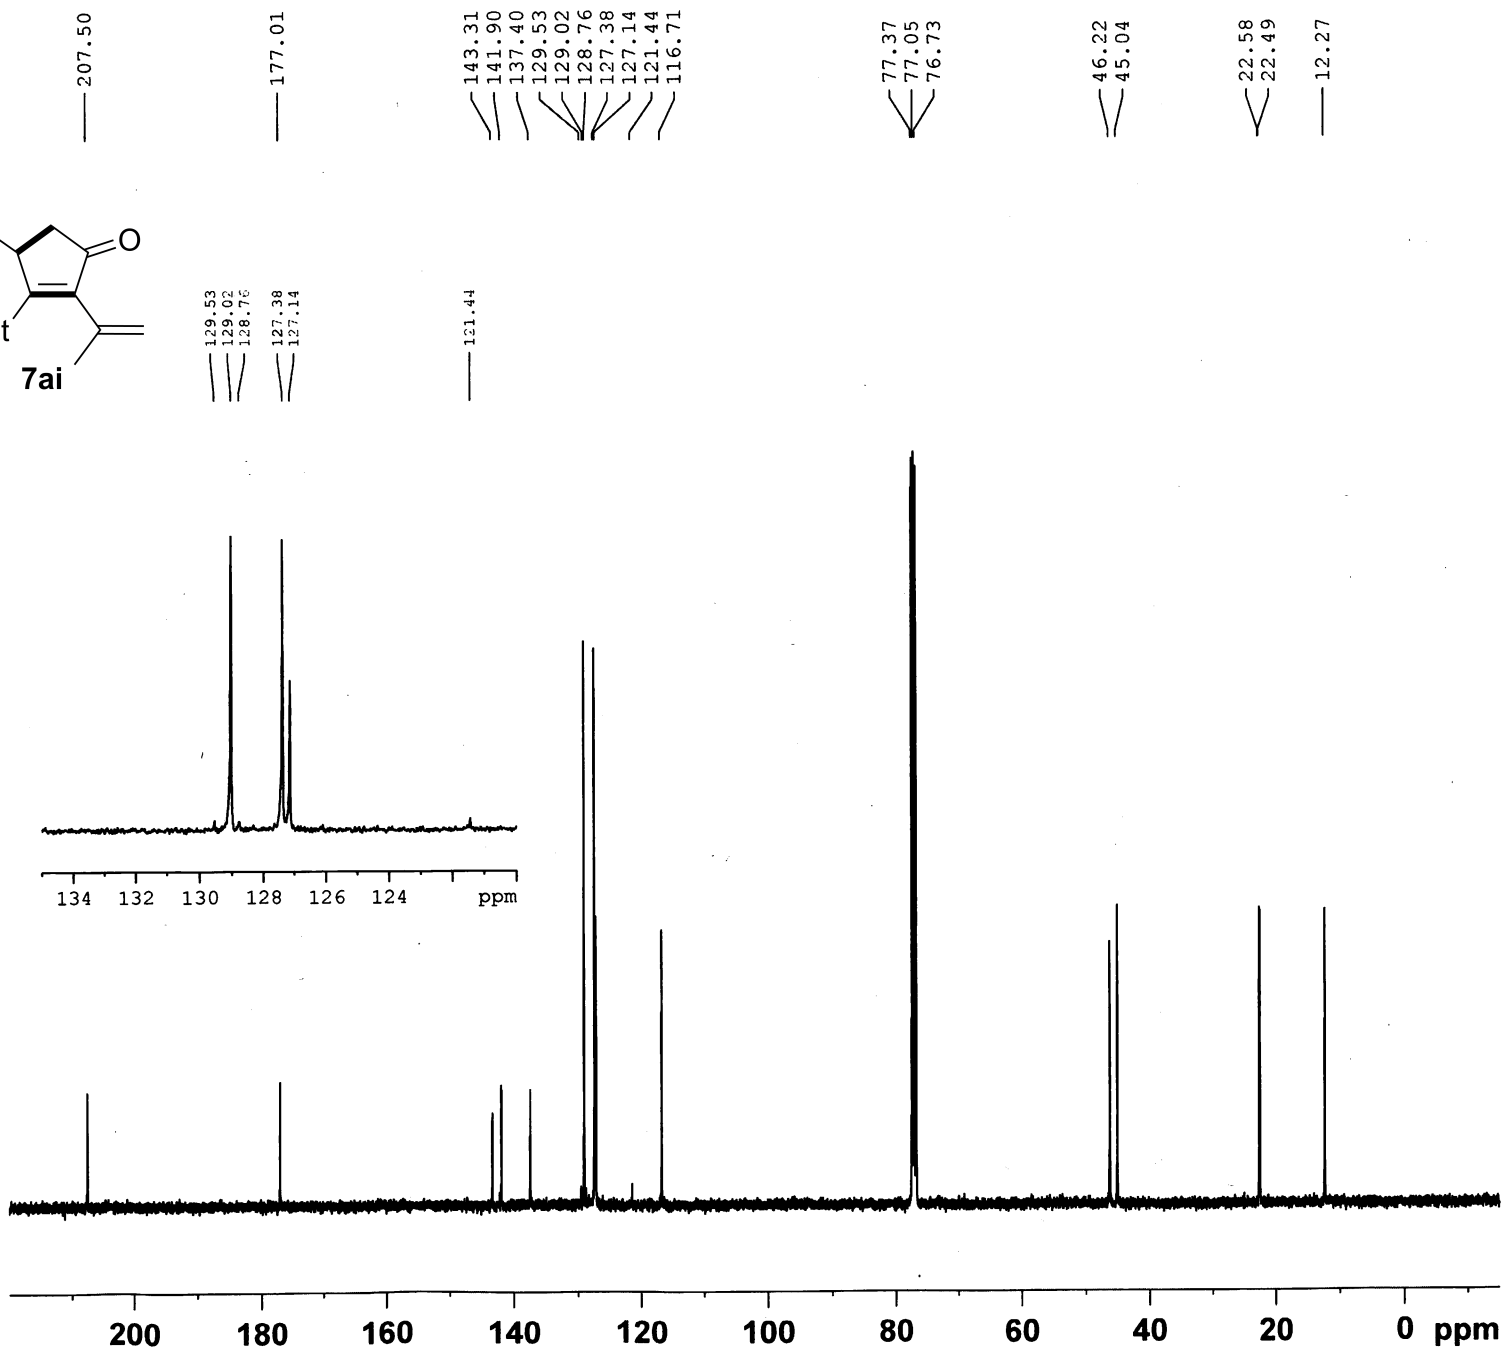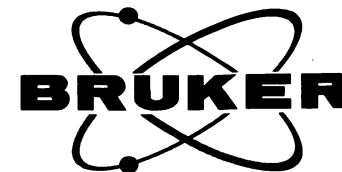

NAME tani(451-500)  
 EXPNO 46604  
 PROCNO 1  
 Date\_ 20100518  
 Time\_ 1.30  
 INSTRUM spect  
 PROBHD 5 mm PABBO BB-  
 PULPROG zgpg30  
 TD 65536  
 SOLVENT CDCl3  
 NS 979  
 DS 4  
 SWH 25252.525 Hz  
 FIDRES 0.385323 Hz  
 AQ 1.2976629 sec  
 RG 203  
 DW 19.800 usec  
 DE 6.50 usec  
 TE 298.4 K  
 D1 2.00000000 sec  
 D11 0.03000000 sec  
 TD0 1

===== CHANNEL f1 =====  
 NUC1 13C  
 P1 10.00 usec  
 PL1 2.20 dB  
 PL1W 21.94663811 W  
 SFO1 100.6228298 MHz

===== CHANNEL f2 =====  
 CPDPRG2 waltz16  
 NUC2 1H  
 PCPD2 75.00 usec  
 PL2 -1.00 dB  
 PL12 14.20 dB  
 PL13 15.00 dB  
 PL2W 13.34481144 W  
 PL12W 0.40300688 W  
 PL13W 0.33520651 W  
 SFO2 400.1316005 MHz  
 SI 32768  
 SF 100.6127690 MHz  
 WDW EM  
 SSB 0  
 LB 1.00 Hz  
 GB 0  
 PC 1.40

7.264  
7.261  
7.247  
7.243  
7.228  
7.224  
7.192  
7.176  
7.171  
7.165  
7.157  
7.043  
7.025  
6.024  
3.887  
3.870  
2.876  
2.872  
2.858  
2.855  
2.829  
2.825  
2.811  
2.808  
2.334  
2.287  
2.111  
2.091  
2.071  
2.057  
2.039  
2.019  
1.458  
1.440  
1.422  
1.405  
1.396  
1.387  
1.369  
1.352  
1.246  
1.229  
1.212  
1.194  
1.176  
1.159  
0.843  
0.793  
0.789  
0.774  
0.770  
0.756  
0.752

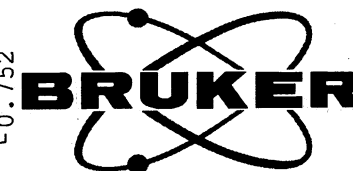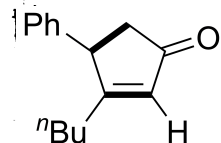

7aj

Current Data Parameters  
NAME 09\_PhCi\_1-hexyne  
EXPNO 1  
PROCNO 1

F2 - Acquisition Parameters

Date\_ 20100623  
Time 23.22  
INSTRUM spect  
PROBHD 5 mm PABBO-BB-  
PULPROG zg30  
TD 65536  
SOLVENT CDCl3  
NS 16  
DS 2  
SWH 8223.685 Hz  
FIDRES 0.125483 Hz  
AQ 3.9846387 sec  
RG 50.8  
DW 60.800 usec  
DE 6.50 usec  
TE 298.2 K  
D1 1.00000000 sec  
TD0 1

===== CHANNEL f1 =====

NUC1 1H  
P1 14.00 usec  
PL1 -1.00 dB  
PL1W 13.34481144 W  
SFO1 400.1324710 MHz

F2 - Processing parameters

SI 32768  
SF 400.1300452 MHz  
WDW EM  
SSB 0  
LB 0.30 Hz  
GB 0  
PC 1.00

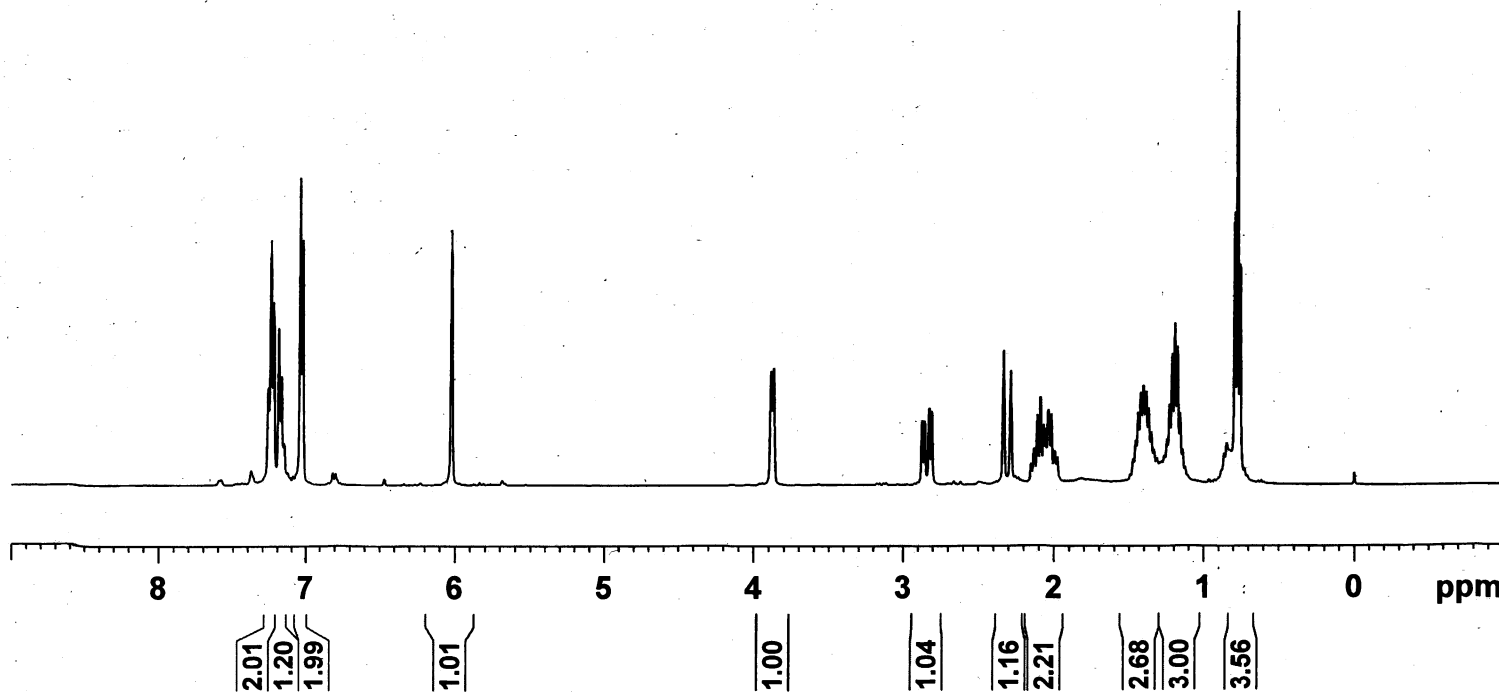

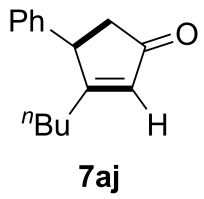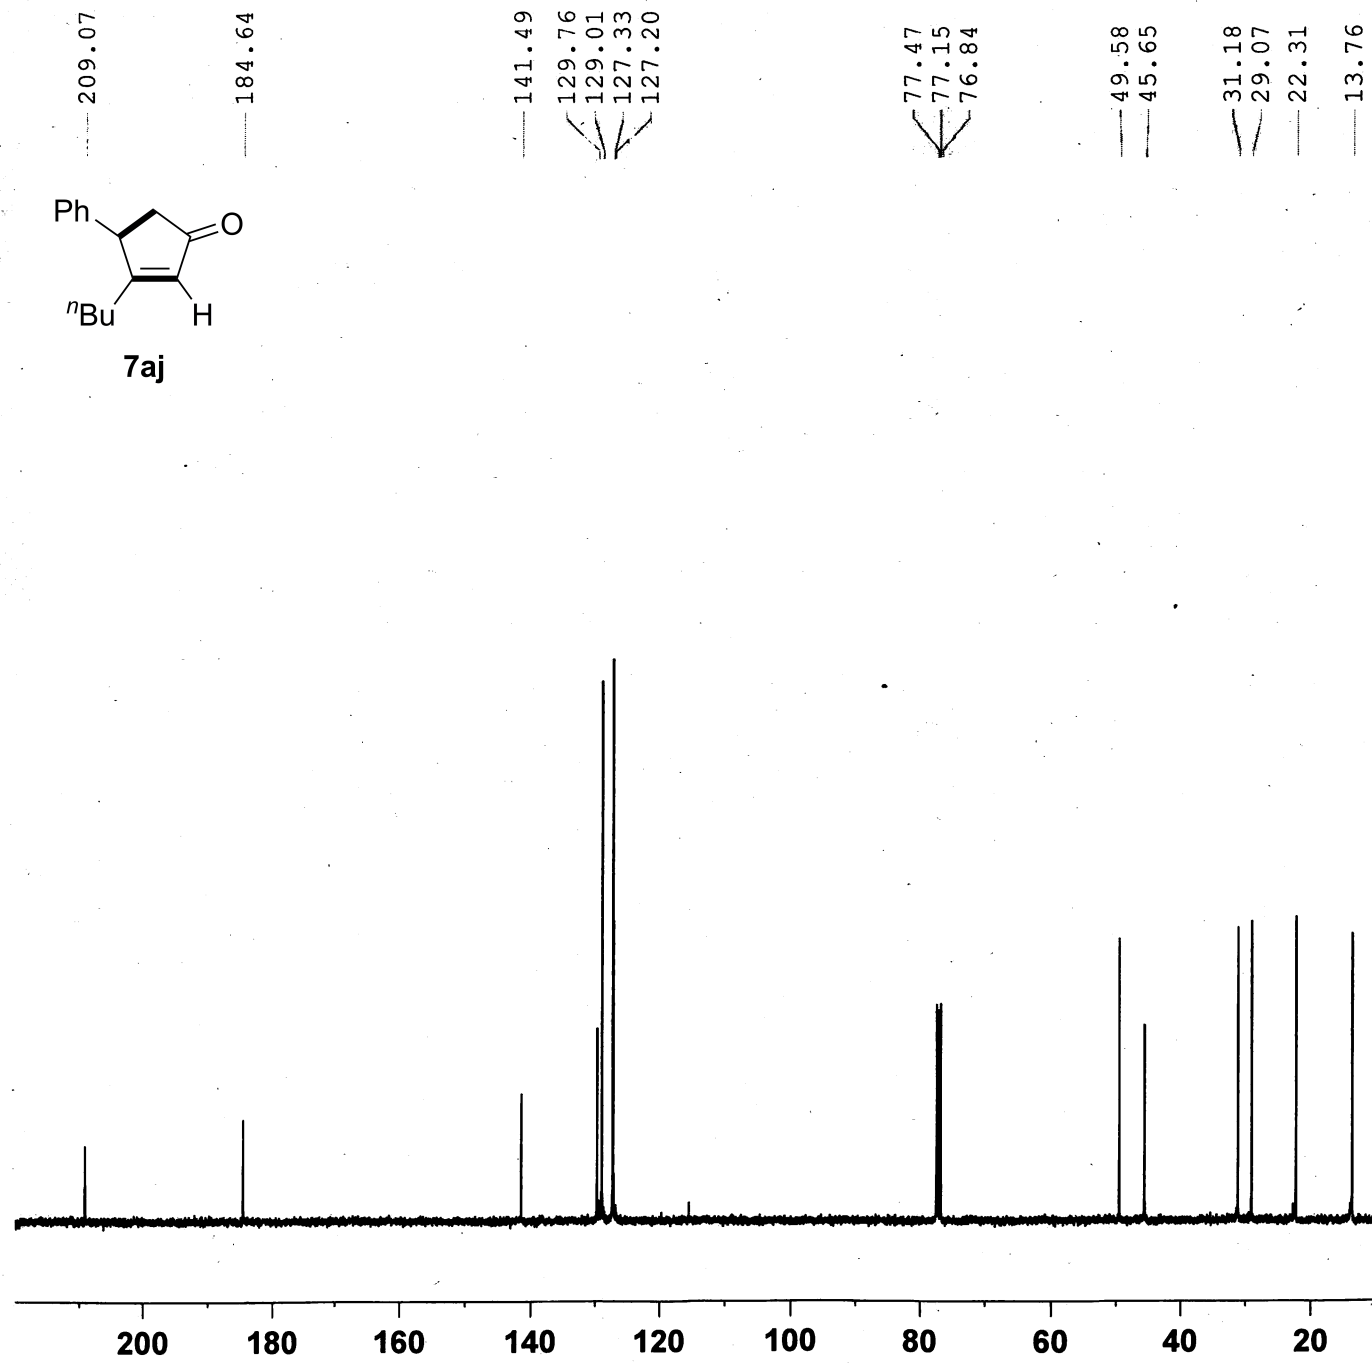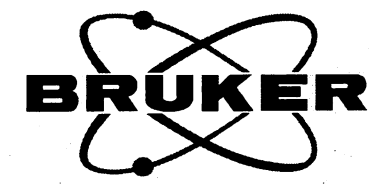

Current Data Parameters  
 NAME 09\_PhCi\_1-hexyne  
 EXPNO 2  
 PROCNO 1

F2 - Acquisition Parameters  
 Date 20100623  
 Time 22.33  
 INSTRUM spect  
 PROBHD 5 mm PABBO BB-  
 PULPROG zgpg30  
 TD 65536  
 SOLVENT CDCl3  
 NS 64  
 DS 4  
 SWH 25252.525 Hz  
 FIDRES 0.385323 Hz  
 AQ 1.2976629 sec  
 RG 203  
 DW 19.800 usec  
 DE 6.50 usec  
 TE 299.4 K  
 D1 2.00000000 sec  
 D11 0.03000000 sec  
 TD0 1

===== CHANNEL f1 =====  
 NUC1 13C  
 P1 10.00 usec  
 PL1 2.20 dB  
 PL1W 21.94663811 W  
 SFO1 100.6228298 MHz

===== CHANNEL f2 =====  
 CPDPRG2 waltz16  
 NUC2 1H  
 PCPD2 75.00 usec  
 PL2 -1.00 dB  
 PL12 14.20 dB  
 PL13 15.00 dB  
 PL2W 13.34481144 W  
 PL12W 0.40300688 W  
 PL13W 0.33520651 W  
 SFO2 400.1316005 MHz

F2 - Processing parameters  
 SI 32768  
 SF 100.6127690 MHz  
 WDW EM  
 SSB 0  
 LB 1.00 Hz  
 GB 0  
 PC 1.40

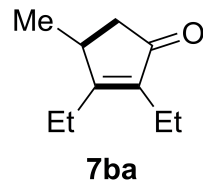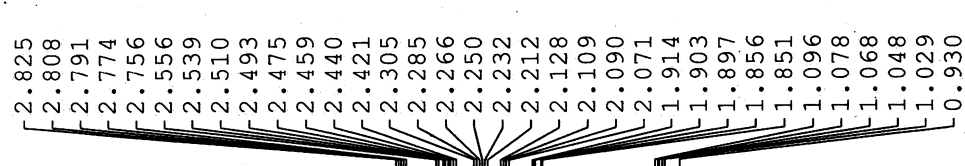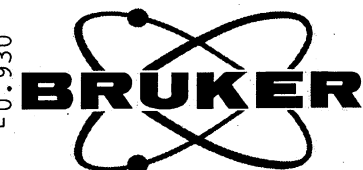

Current Data Parameters  
 NAME 10\_PhCr\_3-hexyne  
 EXPNO 45511  
 PROCNO 1

F2 - Acquisition Parameters  
 Date\_ 20100506  
 Time\_ 22.17  
 INSTRUM spect  
 PROBHD 5 mm PABBO BB-  
 PULPROG zg30  
 TD 65536  
 SOLVENT CDCl3  
 NS 16  
 DS 2  
 SWH 8223.685 Hz  
 FIDRES 0.125483 Hz  
 AQ 3.9846387 sec  
 RG 57  
 DW 60.800 usec  
 DE 6.50 usec  
 TE 296.8 K  
 D1 1.00000000 sec  
 TD0 1

===== CHANNEL f1 =====  
 NUC1 1H  
 P1 14.00 usec  
 PL1 -1.00 dB  
 PL1W 13.34481144 W  
 SFO1 400.1324710 MHz

F2 - Processing parameters  
 SI 32768  
 SF 400.1300306 MHz  
 WDW EM  
 SSB 0  
 LB 0.30 Hz  
 GB 0  
 PC 1.00

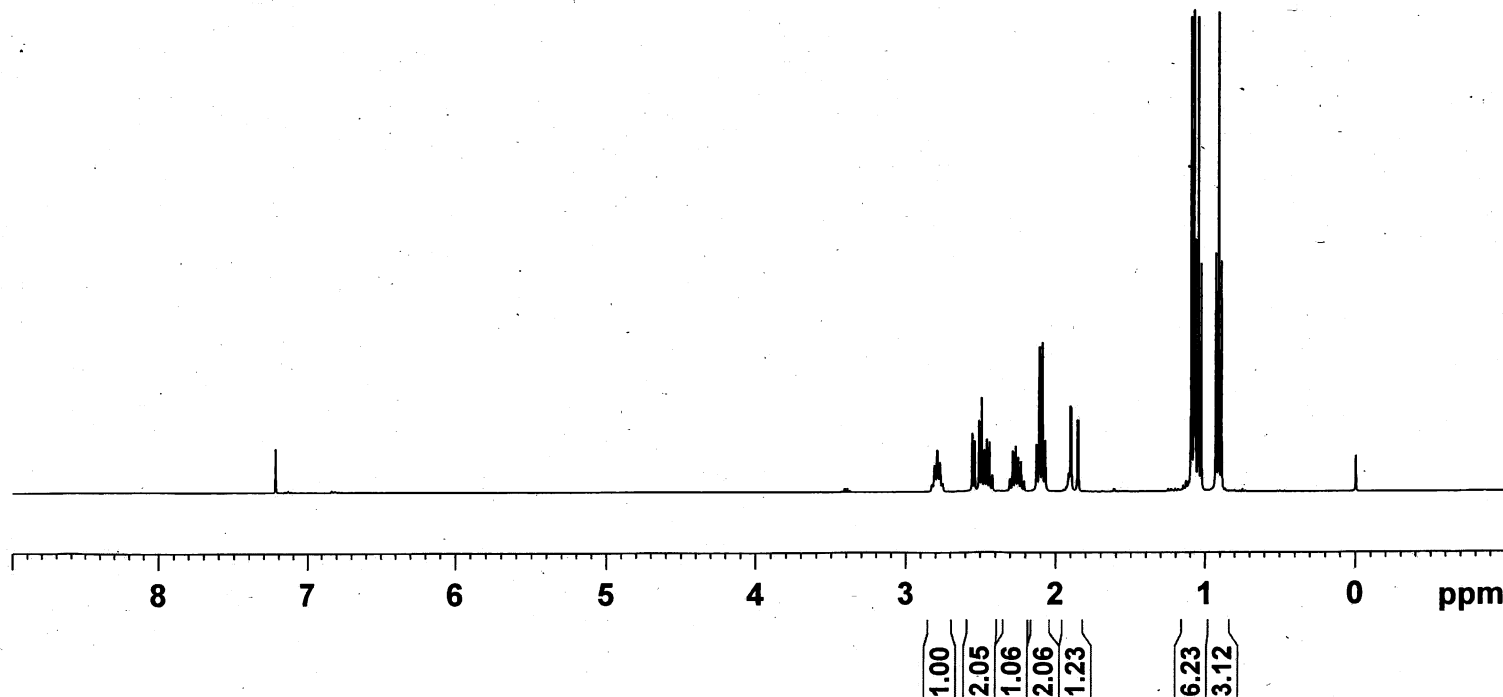

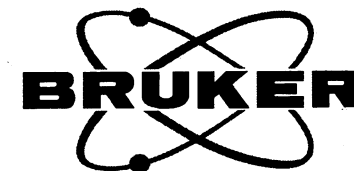

Current Data Parameters  
 NAME 10\_PhCr\_3-hexyne  
 EXPNO 45501  
 PROCNO 1

F2 - Acquisition Parameters  
 Date\_ 20100506  
 Time 22.22  
 INSTRUM spect  
 PROBHD 5 mm PABBO BB-  
 PULPROG zgpg30  
 TD 65536  
 SOLVENT CDCl3  
 NS 48  
 DS 4  
 SWH 24038.461 Hz  
 FIDRES 0.366798 Hz  
 AQ 1.3631988 sec  
 RG 203  
 DW 20.800 usec  
 DE 6.50 usec  
 TE 298.1 K  
 D1 2.00000000 sec  
 D11 0.03000000 sec  
 TD0 1

===== CHANNEL f1 =====  
 NUC1 13C  
 P1 10.00 usec  
 PL1 2.20 dB  
 PL1W 21.94663811 W  
 SFO1 100.6228298 MHz

===== CHANNEL f2 =====  
 CPDPRG2 waltz16  
 NUC2 1H  
 PCPD2 75.00 usec  
 PL2 -1.00 dB  
 PL12 14.20 dB  
 PL13 15.00 dB  
 PL2W 13.34481144 W  
 PL12W 0.40300688 W  
 PL13W 0.33520651 W  
 SFO2 400.1316005 MHz

F2 - Processing parameters  
 SI 32768  
 SF 100.6127690 MHz  
 WDW EM  
 SSB 0  
 LB 1.00 Hz  
 GB 0  
 PC 1.40

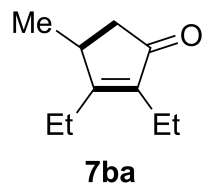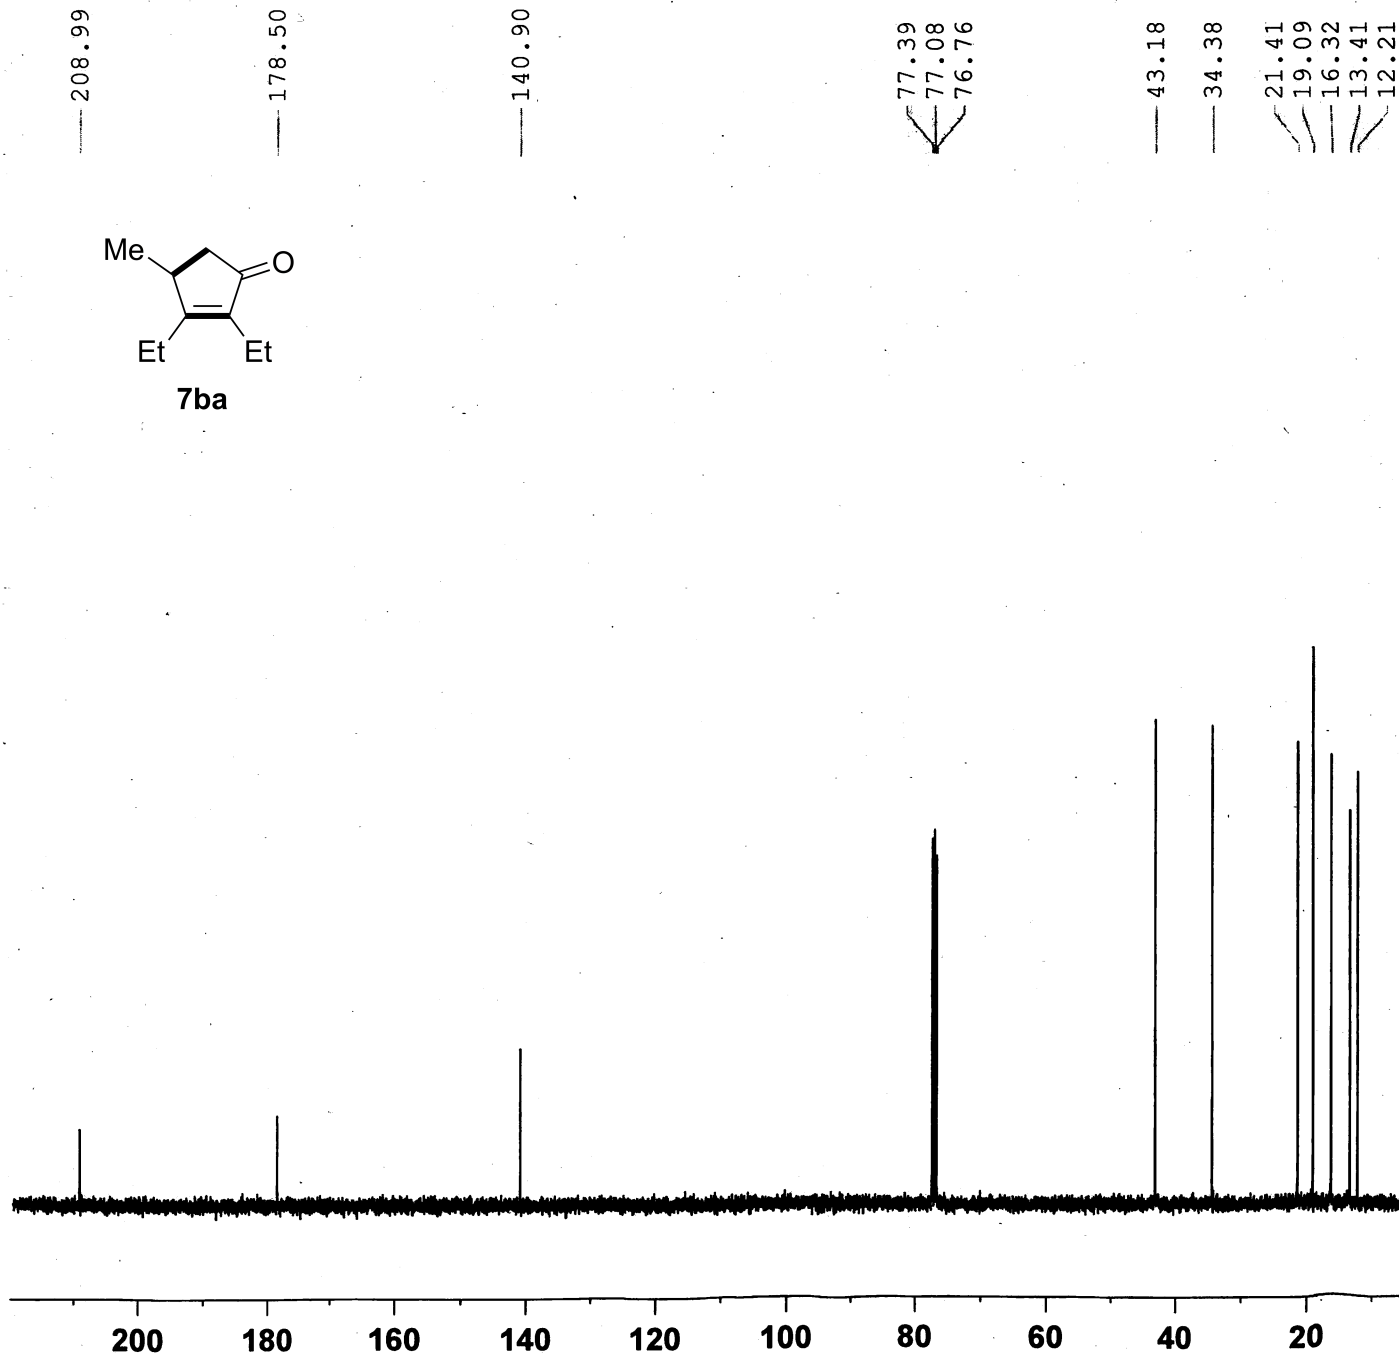

7.260  
2.745  
2.726  
2.515  
2.496  
2.480  
2.460  
2.442  
2.412  
2.396  
2.288  
2.269  
2.253  
2.234  
2.145  
2.126  
2.108  
2.089  
2.010  
2.005  
1.963  
1.959  
1.699  
1.691  
1.683  
1.675  
1.667  
1.307  
1.295  
1.288  
1.282  
1.277  
1.269  
1.260  
1.252  
1.242  
1.236  
1.219  
1.201  
1.148  
1.136  
1.123  
1.112  
1.103  
1.099  
1.081  
1.062  
1.043  
0.940  
0.921  
0.901  
0.881  
0.863

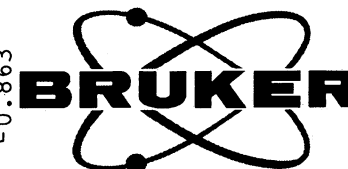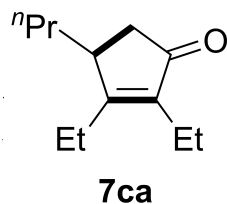

Current Data Parameters  
NAME 11\_PhHex\_3-hexyne  
EXPNO 1  
PROCNO 1

F2 - Acquisition Parameters  
Date 20100423  
Time 17.39  
INSTRUM spect  
PROBHD 5 mm PABBO BB-  
PULPROG zg30  
TD 65536  
SOLVENT CDC13  
NS 16  
DS 2  
SWH 8223.685 Hz  
FIDRES 0.125483 Hz  
AQ 3.9846387 sec  
RG 36  
DW 60.800 usec  
DE 6.50 usec  
TE 294.8 K  
D1 1.00000000 sec  
TD0 1

===== CHANNEL f1 =====  
NUC1 1H  
P1 14.00 usec  
PL1 -1.00 dB  
PL1W 13.34481144 W  
SFO1 400.1324710 MHz

F2 - Processing parameters  
SI 32768  
SF 400.1300170 MHz  
WDW EM  
SSB 0  
LB 0.30 Hz  
GB 0  
PC 1.00

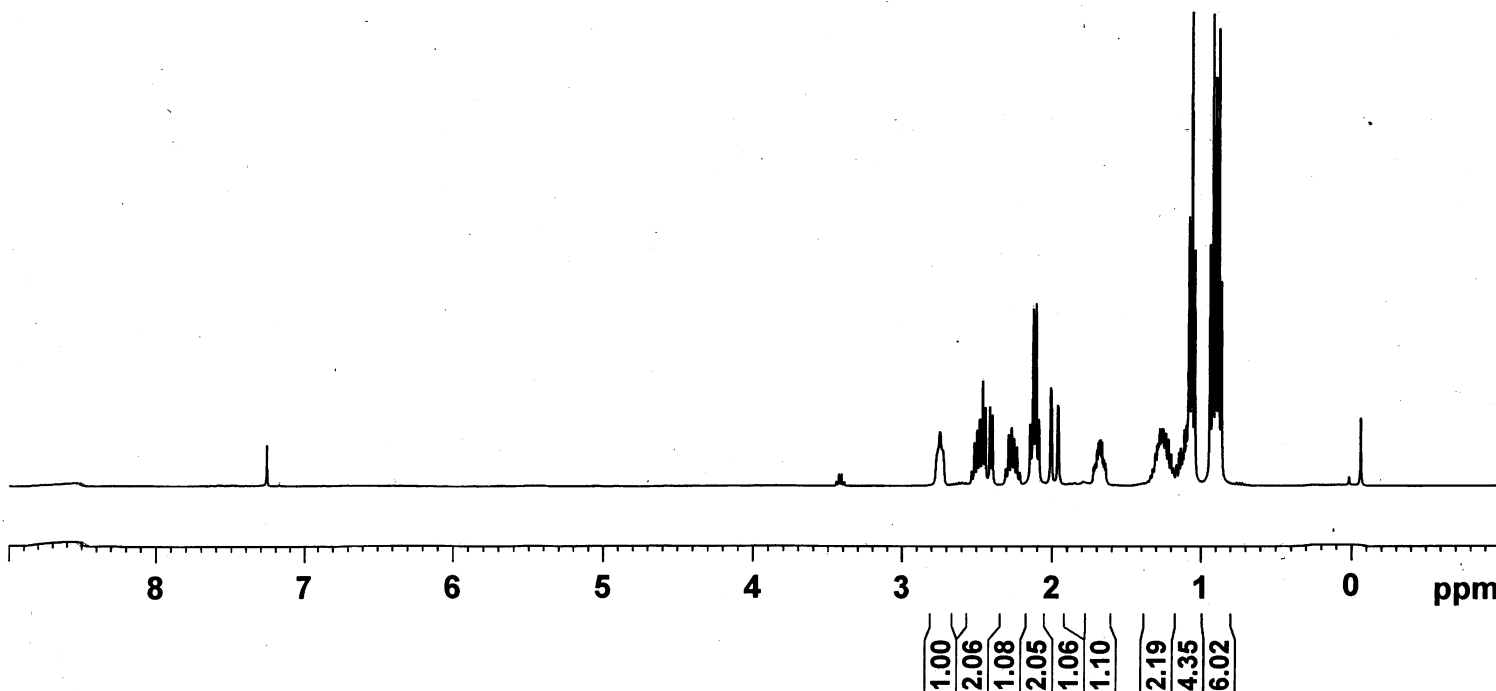

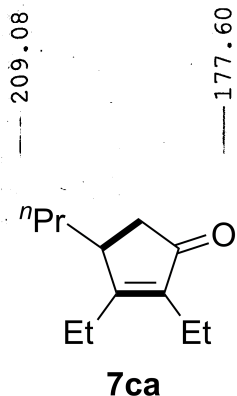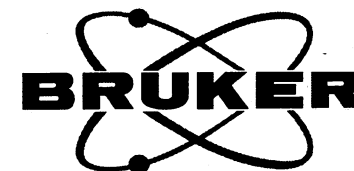

Current Data Parameters  
NAME 11\_PhHex\_3-hexyne  
EXPNO 2  
PROCNO 1

F2 - Acquisition Parameters  
Date 20100423  
Time 17.42  
INSTRUM spect  
PROBHD 5 mm PABBO BB-  
PULPROG zgpg30  
TD 65536  
SOLVENT CDCl3  
NS 31  
DS 4  
SWH 24038.461 Hz  
FIDRES 0.366798 Hz  
AQ 1.3631988 sec  
RG 203  
DW 20.800 usec  
DE 6.50 usec  
TE 295.9 K  
D1 2.00000000 sec  
D11 0.03000000 sec  
TD0 1

===== CHANNEL f1 =====  
NUC1 13C  
P1 10.00 usec  
PL1 2.20 dB  
PL1W 21.94663811 W  
SFO1 100.6228298 MHz

===== CHANNEL f2 =====  
CPDPRG2 waltz16  
NUC2 1H  
PCPD2 75.00 usec  
PL2 -1.00 dB  
PL12 14.20 dB  
PL13 15.00 dB  
PL2W 13.34481144 W  
PL12W 0.40300688 W  
PL13W 0.33520651 W  
SFO2 400.1316005 MHz

F2 - Processing parameters  
SI 32768  
SF 100.6127690 MHz  
WDW EM  
SSB 0  
LB 1.00 Hz  
GB 0  
PC 1.40

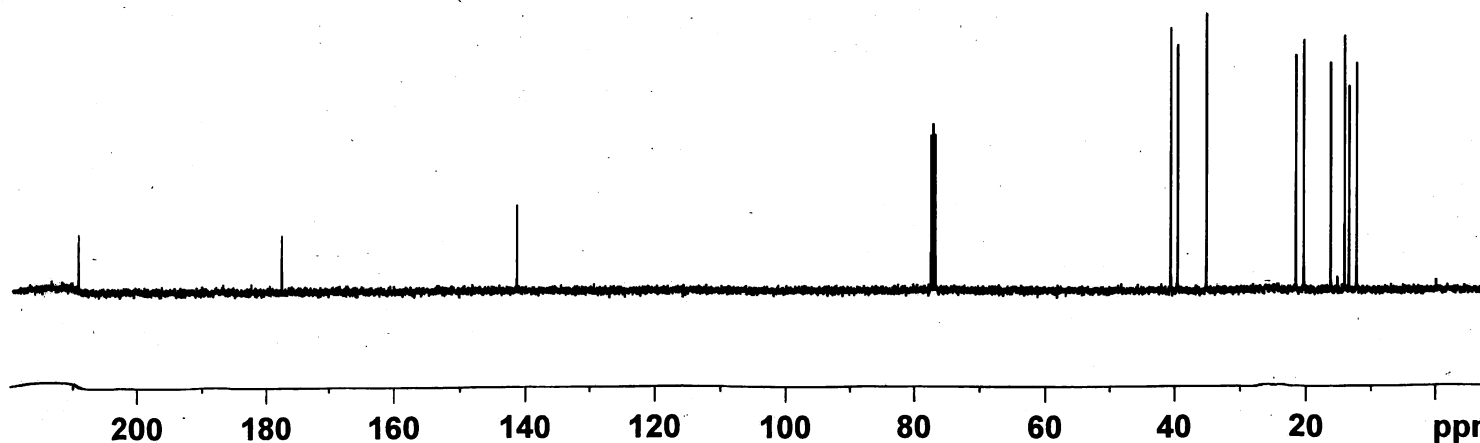

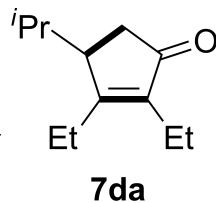

2.809  
2.801  
2.793  
2.536  
2.517  
2.498  
2.482  
2.463  
2.444  
2.215  
2.195  
2.178  
2.160  
2.148  
2.131  
2.124  
2.104  
2.085  
2.076  
2.066  
2.060  
2.042  
2.018  
2.013  
1.355  
1.181  
1.128  
1.098  
1.069  
1.050  
1.031  
0.933  
0.922

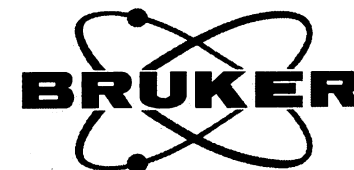

Current Data Parameters  
NAME 12\_PhMPen\_3-hexyne  
EXPNO 1  
PROCNO 1

F2 - Acquisition Parameters  
Date\_ 20100512  
Time\_ 18.30  
INSTRUM spect  
PROBHD 5 mm PABBO BB-  
PULPROG zg30  
TD 65536  
SOLVENT CDC13  
NS 16  
DS 2  
SWH 8223.685 Hz  
FIDRES 0.125483 Hz  
AQ 3.9846387 sec  
RG 25.4  
DW 60.800 usec  
DE 6.50 usec  
TE 295.5 K  
D1 1.00000000 sec  
TD0 1

===== CHANNEL f1 =====  
NUC1 1H  
P1 14.00 usec  
PL1 -1.00 dB  
PL1W 13.34481144 W  
SFO1 400.1324710 MHz

F2 - Processing parameters  
SI 32768  
SF 400.1300224 MHz  
WDW EM  
SSB 0  
LB 0.30 Hz  
GB 0  
PC 1.00

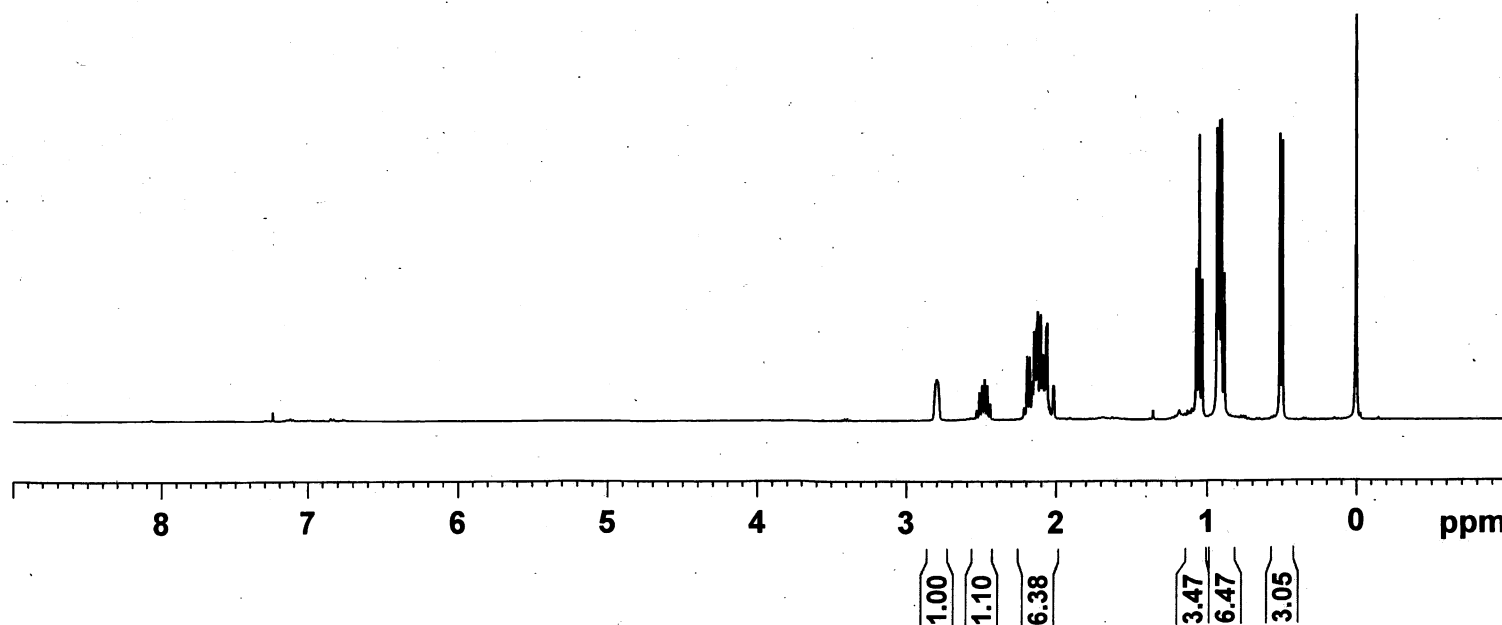

208.37

175.78

141.25

128.35

114.48

76.45  
76.13  
75.81

44.03

33.90

26.44

20.85

20.57

15.22

13.56

12.52

11.19

-0.00

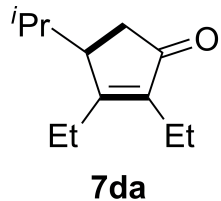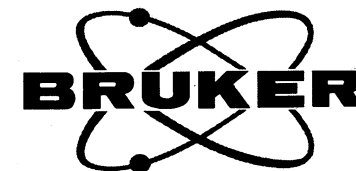

Current Data Parameters  
 NAME 12\_PhMPen\_3-hexyne  
 EXPNO 1  
 PROCNO 1

F2 - Acquisition Parameters  
 Date\_ 20100512  
 Time\_ 18.33  
 INSTRUM spect  
 PROBHD 5 mm PABBO BB-  
 PULPROG zgpg30  
 TD 65536  
 SOLVENT CDC13  
 NS 25  
 DS 4  
 SWH 25252.525 Hz  
 FIDRES 0.385323 Hz  
 AQ 1.2976629 sec  
 RG 203  
 DW 19.800 usec  
 DE 6.50 usec  
 TE 296.5 K  
 D1 2.00000000 sec  
 D11 0.03000000 sec  
 TD0 1

===== CHANNEL f1 =====  
 NUC1 13C  
 P1 10.00 usec  
 PL1 2.20 dB  
 PL1W 21.94663811 W  
 SFO1 100.6228298 MHz

===== CHANNEL f2 =====  
 CPDPRG2 waltz16  
 NUC2 1H  
 PCPD2 75.00 usec  
 PL2 -1.00 dB  
 PL12 14.20 dB  
 PL13 15.00 dB  
 PL2W 13.34481144 W  
 PL12W 0.40300688 W  
 PL13W 0.33520651 W  
 SFO2 400.1316005 MHz

F2 - Processing parameters  
 SI 32768  
 SF 100.6128677 MHz  
 WDW EM  
 SSB 0  
 LB 1.00 Hz  
 GB 0  
 PC 1.40

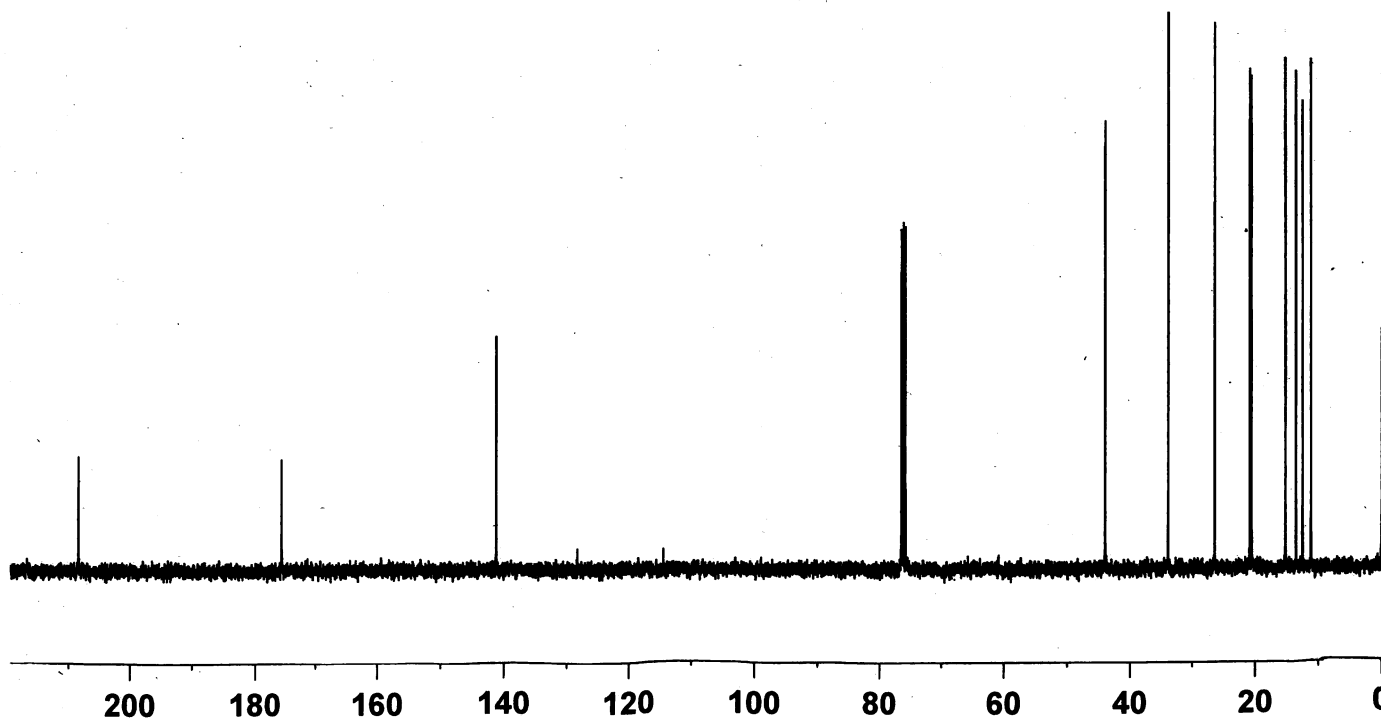

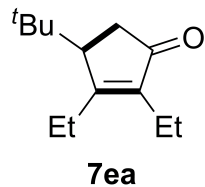

2.676  
 2.661  
 2.635  
 2.616  
 2.600  
 2.581  
 2.563  
 2.383  
 2.364  
 2.347  
 2.329  
 2.312  
 2.296  
 2.266  
 2.250  
 2.203  
 2.198  
 2.179  
 2.157  
 2.152  
 2.144  
 2.125  
 2.106  
 2.087  
 2.072  
 1.083  
 1.063  
 1.045  
 0.925  
 0.906  
 0.883

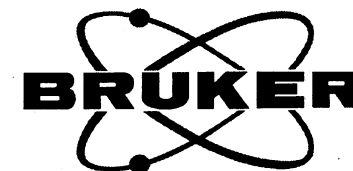

Current Data Parameters  
 NAME 14\_PhDMPen\_3-hexyne  
 EXPNO 1  
 PROCNO 1

F2 - Acquisition Parameters  
 Date\_ 20100513  
 Time\_ 12.57  
 INSTRUM spect  
 PROBHD 5 mm PABBO BB-  
 PULPROG zg30  
 TD 65536  
 SOLVENT CDCl3  
 NS 16  
 DS 2  
 SWH 8223.685 Hz  
 FIDRES 0.125483 Hz  
 AQ 3.9846387 sec  
 RG 40.3  
 DW 60.800 usec  
 DE 6.50 usec  
 TE 295.1 K  
 D1 1.00000000 sec  
 TDO 1

===== CHANNEL f1 =====  
 NUC1 1H  
 P1 14.00 usec  
 PL1 -1.00 dB  
 PL1W 13.34481144 W  
 SFO1 400.1324710 MHz

F2 - Processing parameters  
 SI 32768  
 SF 400.1300316 MHz  
 WDW EM  
 SSB 0  
 LB 0.30 Hz  
 GB 0  
 PC 1.00

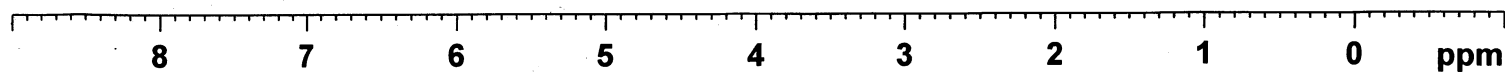

2.00  
 1.20  
 0.67  
 2.76  
 3.31  
 10.58

209.10

176.65

143.70

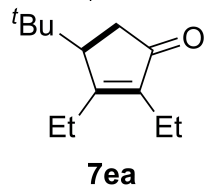

77.40  
77.08  
76.77

49.78  
39.55  
34.42  
28.31  
24.22  
23.73  
16.41  
15.77  
13.48  
12.69  
10.95  
1.01

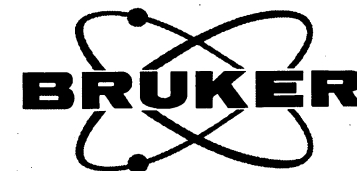

Current Data Parameters  
NAME 14\_PhDMPen\_3-hexyne  
EXPNO 13  
PROCNO 1

F2 - Acquisition Parameters  
Date 20100513  
Time 13.05  
INSTRUM spect  
PROBHD 5 mm PABBO BB-  
PULPROG zgpg30  
TD 65536  
SOLVENT CDCl3  
NS 53  
DS 4  
SWH 24038.461 Hz  
FIDRES 0.366798 Hz  
AQ 1.3631988 sec  
RG 203  
DW 20.800 usec  
DE 6.50 usec  
TE 296.4 K  
D1 2.00000000 sec  
D11 0.03000000 sec  
TD0 1

===== CHANNEL f1 =====  
NUC1 13C  
P1 10.00 usec  
PL1 2.20 dB  
PL1W 21.94663811 W  
SFO1 100.6228298 MHz

===== CHANNEL f2 =====  
CPDPRG2 waltz16  
NUC2 1H  
PCPD2 75.00 usec  
PL2 -1.00 dB  
PL12 14.20 dB  
PL13 15.00 dB  
PL2W 13.34481144 W  
PL12W 0.40300688 W  
PL13W 0.33520651 W  
SFO2 400.1316005 MHz

F2 - Processing parameters  
SI 32768  
SF 100.6127690 MHz  
WDW EM  
SSB 0  
LB 1.00 Hz  
GB 0  
PC 1.40

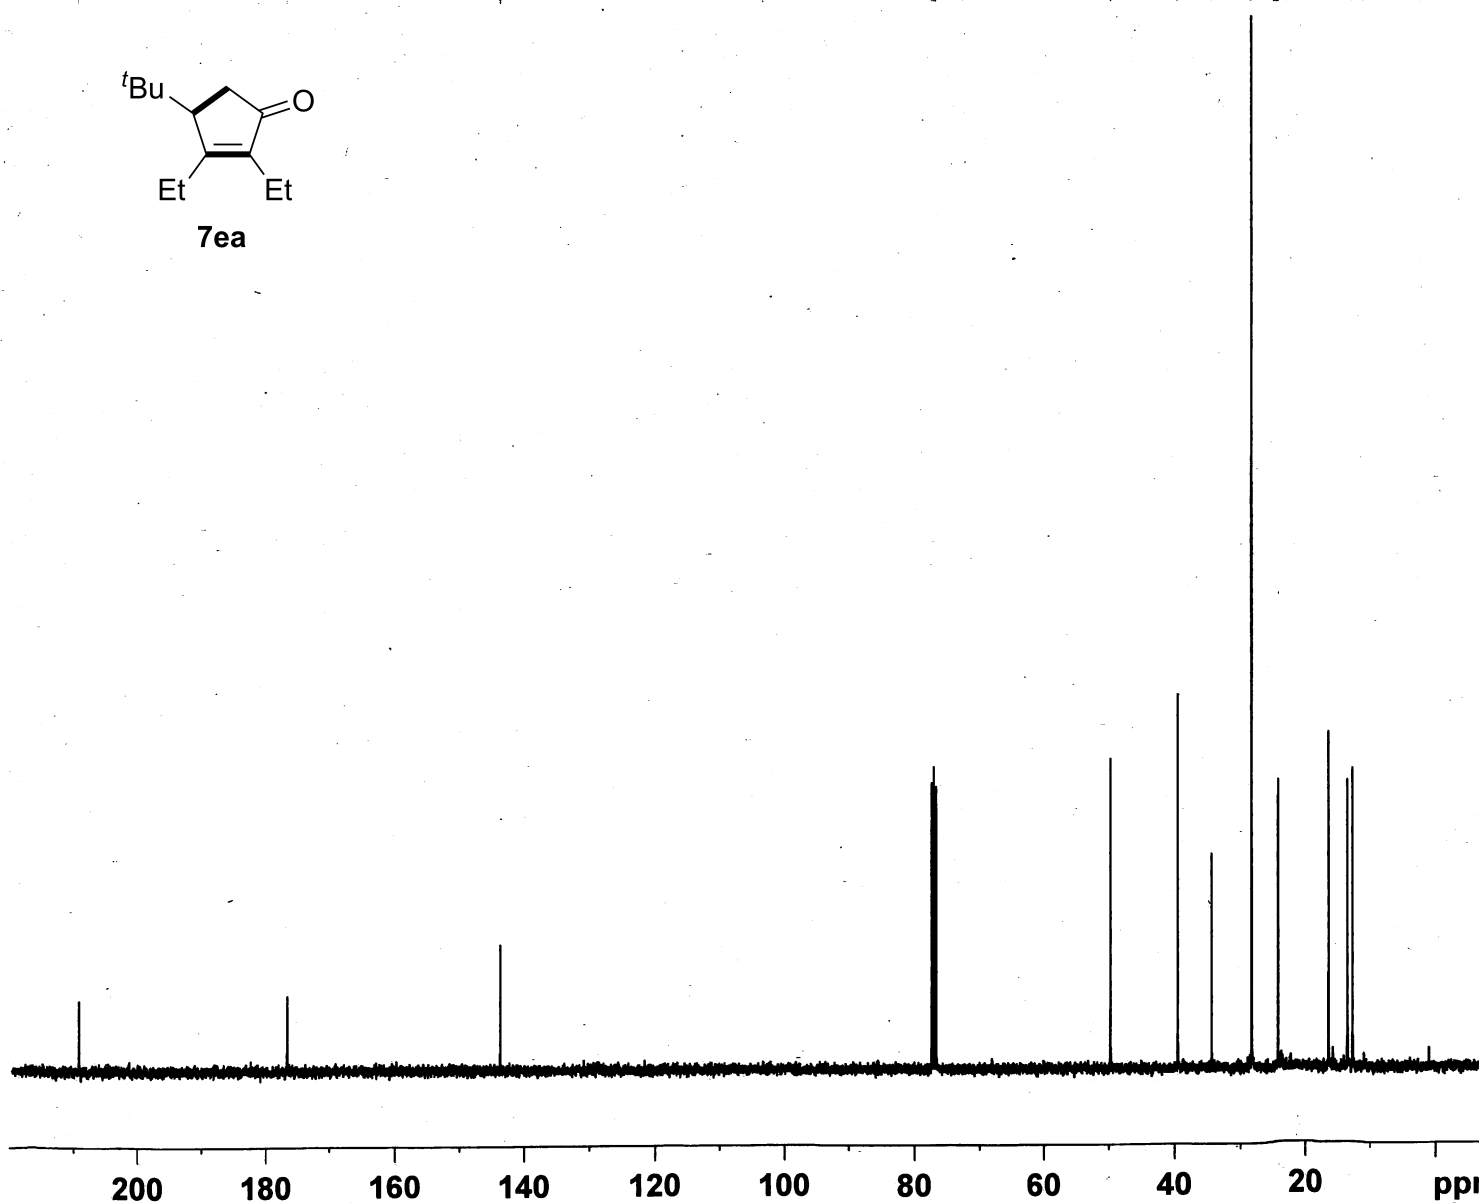

2.791  
2.784  
2.777  
2.531  
2.513  
2.497  
2.478  
2.235  
2.219  
2.201  
2.187  
2.172  
2.152  
2.145  
2.136  
2.117  
2.104  
2.098  
1.738  
1.731  
1.724  
1.709  
1.701  
1.693  
1.679  
1.670  
1.662  
1.656  
1.629  
1.616  
1.599  
1.567  
1.265  
1.233  
1.213  
1.197  
1.135  
1.127  
1.118  
1.110  
1.103  
1.091  
1.072  
1.053  
1.041  
1.032  
1.009  
0.938  
0.919  
0.900  
0.747  
0.738  
0.707

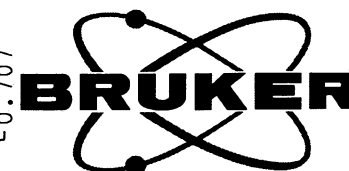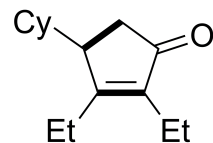

7fa

Current Data Parameters  
NAME 13\_PhCy\_3-hexyne  
EXPNO 1  
PROCNO 1

F2 - Acquisition Parameters  
Date\_ 20100518  
Time\_ 23.07  
INSTRUM spect  
PROBHD 5 mm PABBO BB-  
PULPROG zg30  
TD 65536  
SOLVENT CDCl3  
NS 16  
DS 2  
SWH 8223.685 Hz  
FIDRES 0.125483 Hz  
AQ 3.9846387 sec  
RG 28.5  
DW 60.800 usec  
DE 6.50 usec  
TE 297.0 K  
D1 1.00000000 sec  
TD0 1

===== CHANNEL f1 =====  
NUC1 1H  
P1 14.00 usec  
PL1 -1.00 dB  
PL1W 13.34481144 W  
SFO1 400.1324710 MHz

F2 - Processing parameters  
SI 32768  
SF 400.1300170 MHz  
WDW EM  
SSB 0  
LB 0.30 Hz  
GB 0  
PC 1.00

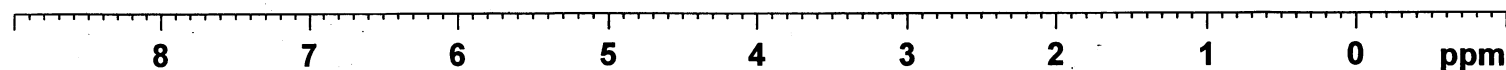

1.00  
1.04  
5.34  
5.39  
1.67  
7.25  
3.14  
1.06

209.40

176.44

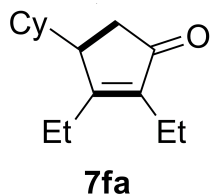

142.18

129.35

119.58

119.31

115.47

77.43

77.11

76.79

67.29

44.78

40.33

38.17

36.24

32.45

31.68

26.78

26.38

26.10

25.93

25.71

25.20

21.86

21.66

16.23

13.53

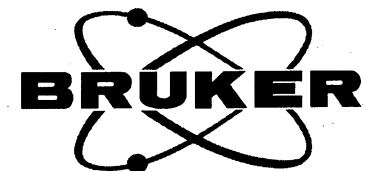

Current Data Parameters  
 NAME 13\_PhCy\_3-hexyne  
 EXPNO 13  
 PROCNO 1

F2 - Acquisition Parameters  
 Date 20100518  
 Time 23.10  
 INSTRUM spect  
 PROBHD 5 mm PABBO BB-  
 PULPROG zgpg30  
 TD 65536  
 SOLVENT CDC13  
 NS 49  
 DS 4  
 SWH 24038.461 Hz  
 FIDRES 0.366798 Hz  
 AQ 1.3631988 sec  
 RG 203  
 DW 20.800 usec  
 DE 6.50 usec  
 TE 297.9 K  
 D1 2.00000000 sec  
 D11 0.03000000 sec  
 TD0 1

===== CHANNEL f1 =====  
 NUC1 13C  
 P1 10.00 usec  
 PL1 2.20 dB  
 PL1W 21.94663811 W  
 SFO1 100.6228298 MHz

===== CHANNEL f2 =====  
 CPDPRG2 waltz16  
 NUC2 1H  
 PCPD2 75.00 usec  
 PL2 -1.00 dB  
 PL12 14.20 dB  
 PL13 15.00 dB  
 PL2W 13.34481144 W  
 PL12W 0.40300688 W  
 PL13W 0.33520651 W  
 SFO2 400.1316005 MHz

F2 - Processing parameters  
 SI 32768  
 SF 100.6127690 MHz  
 WDW EM  
 SSB 0  
 LB 1.00 Hz  
 GB 0  
 PC 1.40

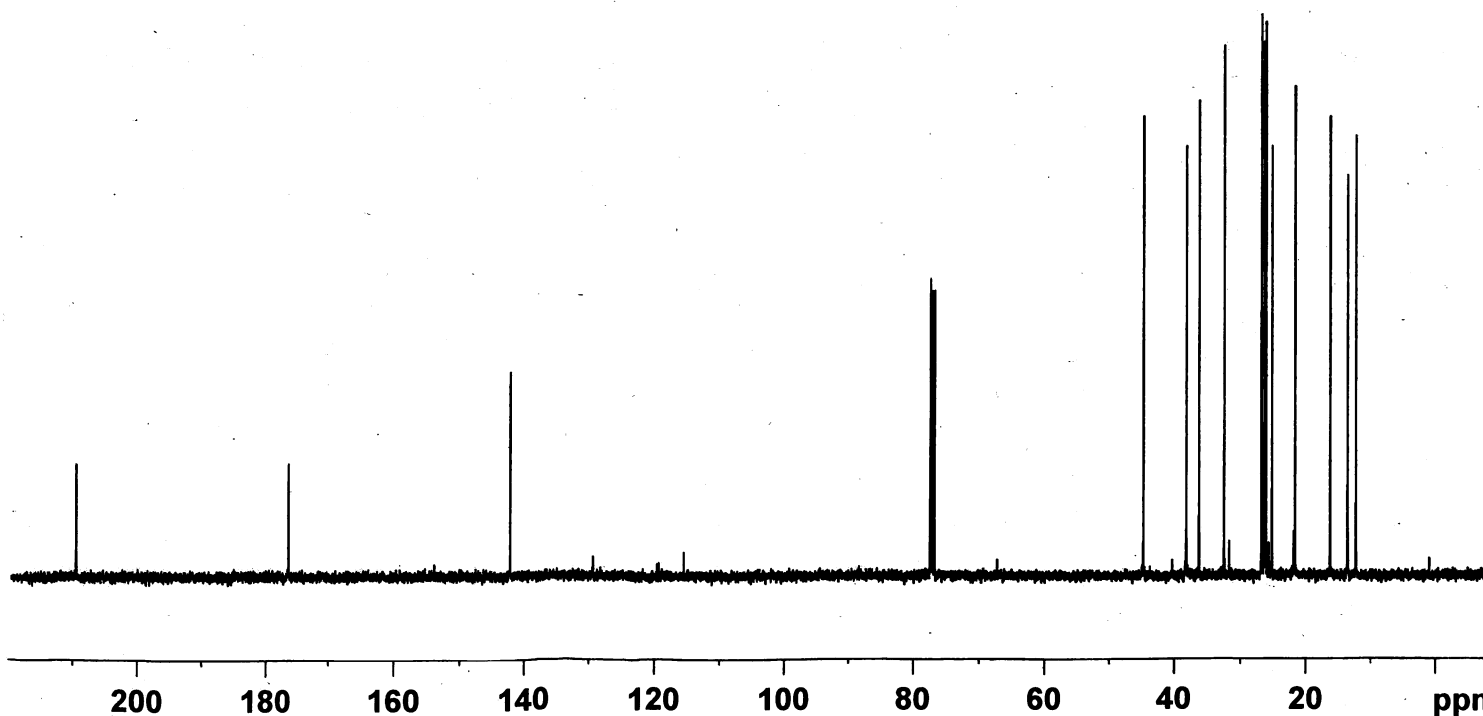

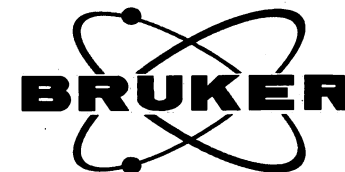

NAME tani  
EXPNO 59812010  
PROCNO 1  
Date\_ 20110315  
Time\_ 18.54  
INSTRUM spect  
PROBHD 5 mm PABBO BB-  
PULPROG zg30  
TD 65536  
SOLVENT CDCl3  
NS 16  
DS 2  
SWH 8223.685 Hz  
FIDRES 0.125483 Hz  
AQ 3.9846387 sec  
RG 203  
DW 60.800 usec  
DE 6.50 usec  
TE 296.0 K  
D1 1.00000000 sec  
TD0 1

===== CHANNEL f1 =====  
NUC1 1H  
P1 14.00 usec  
PL1 -1.20 dB  
PL1W 13.97373390 W  
SFO1 400.1324710 MHz  
SI 32768  
SF 400.1300177 MHz  
WDW EM  
SSB 0  
LB 0.30 Hz  
GB 0  
PC 1.00

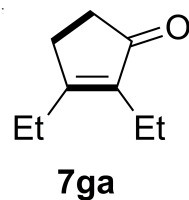

— 7.261

2.491  
2.452  
2.434  
2.416  
2.359  
2.192  
2.174  
2.157  
1.155  
1.137  
1.120  
0.990  
0.973  
0.955

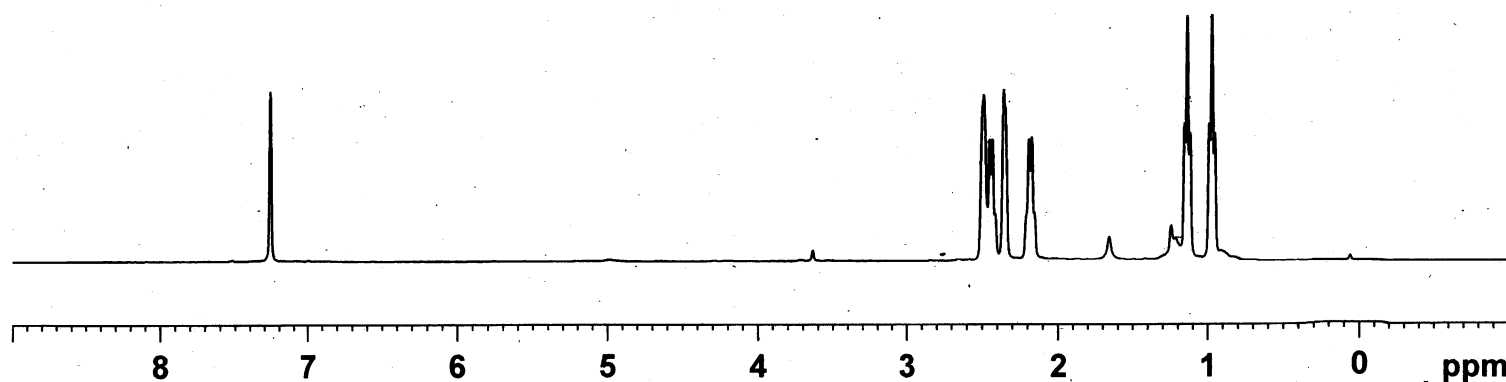

3.81  
1.95  
2.00  
2.99  
2.99

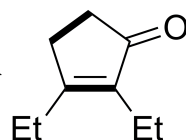

7ga

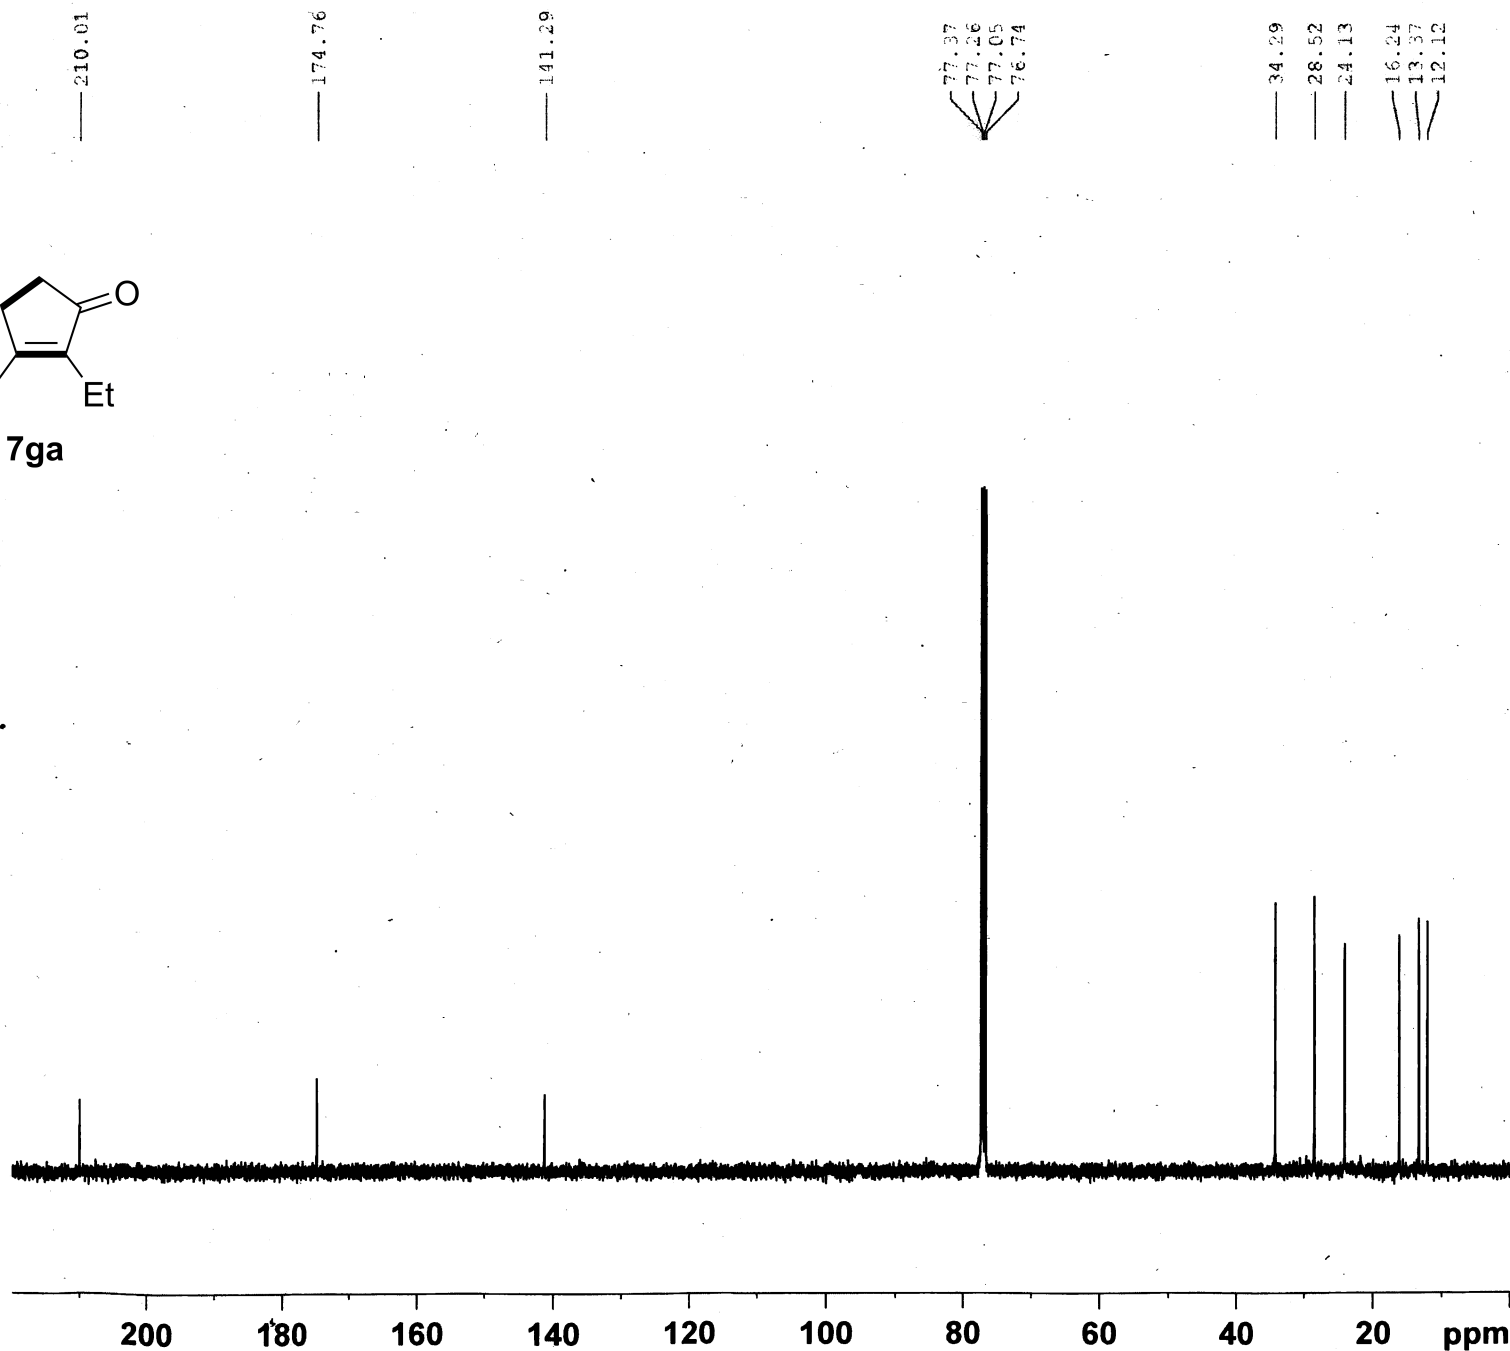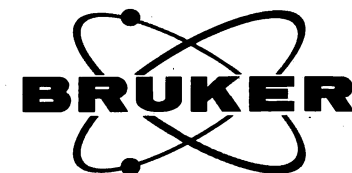

```

NAME          tani
EXPNO         59811011
PROCNO        1
Date_         20110315
Time_         18.35
INSTRUM       spect
PROBHD        5 mm PABBO BB-
PULPROG       zgpg30
TD            65536
SOLVENT       CDC13
NS            265
DS            4
SWH           25252.525 Hz
FIDRES        0.385323 Hz
AQ            1.2976629 sec
RG            114
DW            19.800 usec
DE            6.50 usec
TE            296.8 K
D1            2.00000000 sec
D11           0.03000000 sec
TD0           1
  
```

```

===== CHANNEL f1 =====
NUC1          13C
P1            10.00 usec
PL1           2.20 dB
PL1W          21.94663811 W
SFO1          100.6228298 MHz
  
```

```

===== CHANNEL f2 =====
CPDPRG2       waltz16
NUC2           1H
PCPD2         100.00 usec
PL2           -1.20 dB
PL12          15.88 dB
PL13          16.00 dB
PL2W          13.97373390 W
PL12W         0.27372372 W
PL13W         0.26626399 W
SFO2          400.1316005 MHz
SI            32768
SF            100.6127690 MHz
WDW           EM
SSB           0
LB            1.00 Hz
GB            0
PC            1.40
  
```

PhMMA + 3-Hex

— 7.270

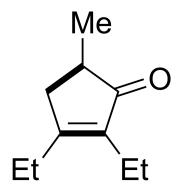

7ha

2.772  
2.755  
2.727  
2.710  
2.448  
2.429  
2.410  
2.391  
2.368  
2.362  
2.349  
2.344  
2.331  
2.326  
2.314  
2.308  
2.295  
2.289  
2.195  
2.176  
2.157  
2.139  
2.091  
2.088  
2.086  
2.046  
2.043  
2.041  
1.151  
1.137  
1.133  
1.118  
1.112  
1.099  
0.979  
0.961  
0.942

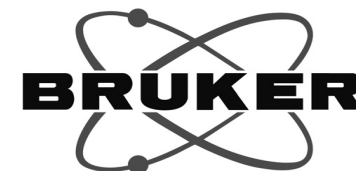

Current Data Parameters  
NAME 15\_PhMA\_3-hexyne  
EXPNO 1  
PROCNO 1

F2 - Acquisition Parameters  
Date\_ 20100518  
Time 23.32  
INSTRUM spect  
PROBHD 5 mm PABBO BB-  
PULPROG zg30  
TD 65536  
SOLVENT CDC13  
NS 16  
DS 2  
SWH 8223.685 Hz  
FIDRES 0.125483 Hz  
AQ 3.9846387 sec  
RG 64  
DW 60.800 usec  
DE 6.50 usec  
TE 297.1 K  
D1 1.00000000 sec  
TD0 1

===== CHANNEL f1 =====  
NUC1 1H  
P1 14.00 usec  
PL1 -1.00 dB  
PL1W 13.34481144 W  
SFO1 400.1324710 MHz

F2 - Processing parameters  
SI 32768  
SF 400.1300132 MHz  
WDW EM  
SSB 0  
LB 0.30 Hz  
GB 0  
PC 1.00

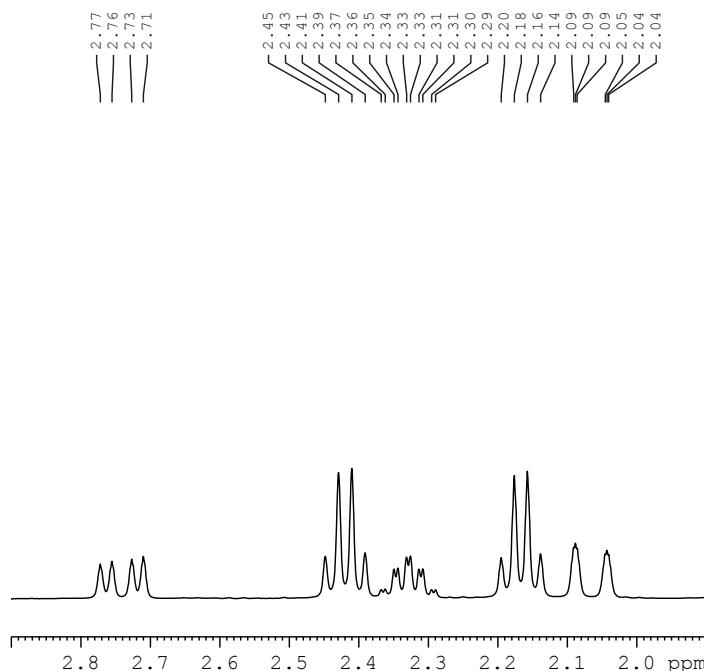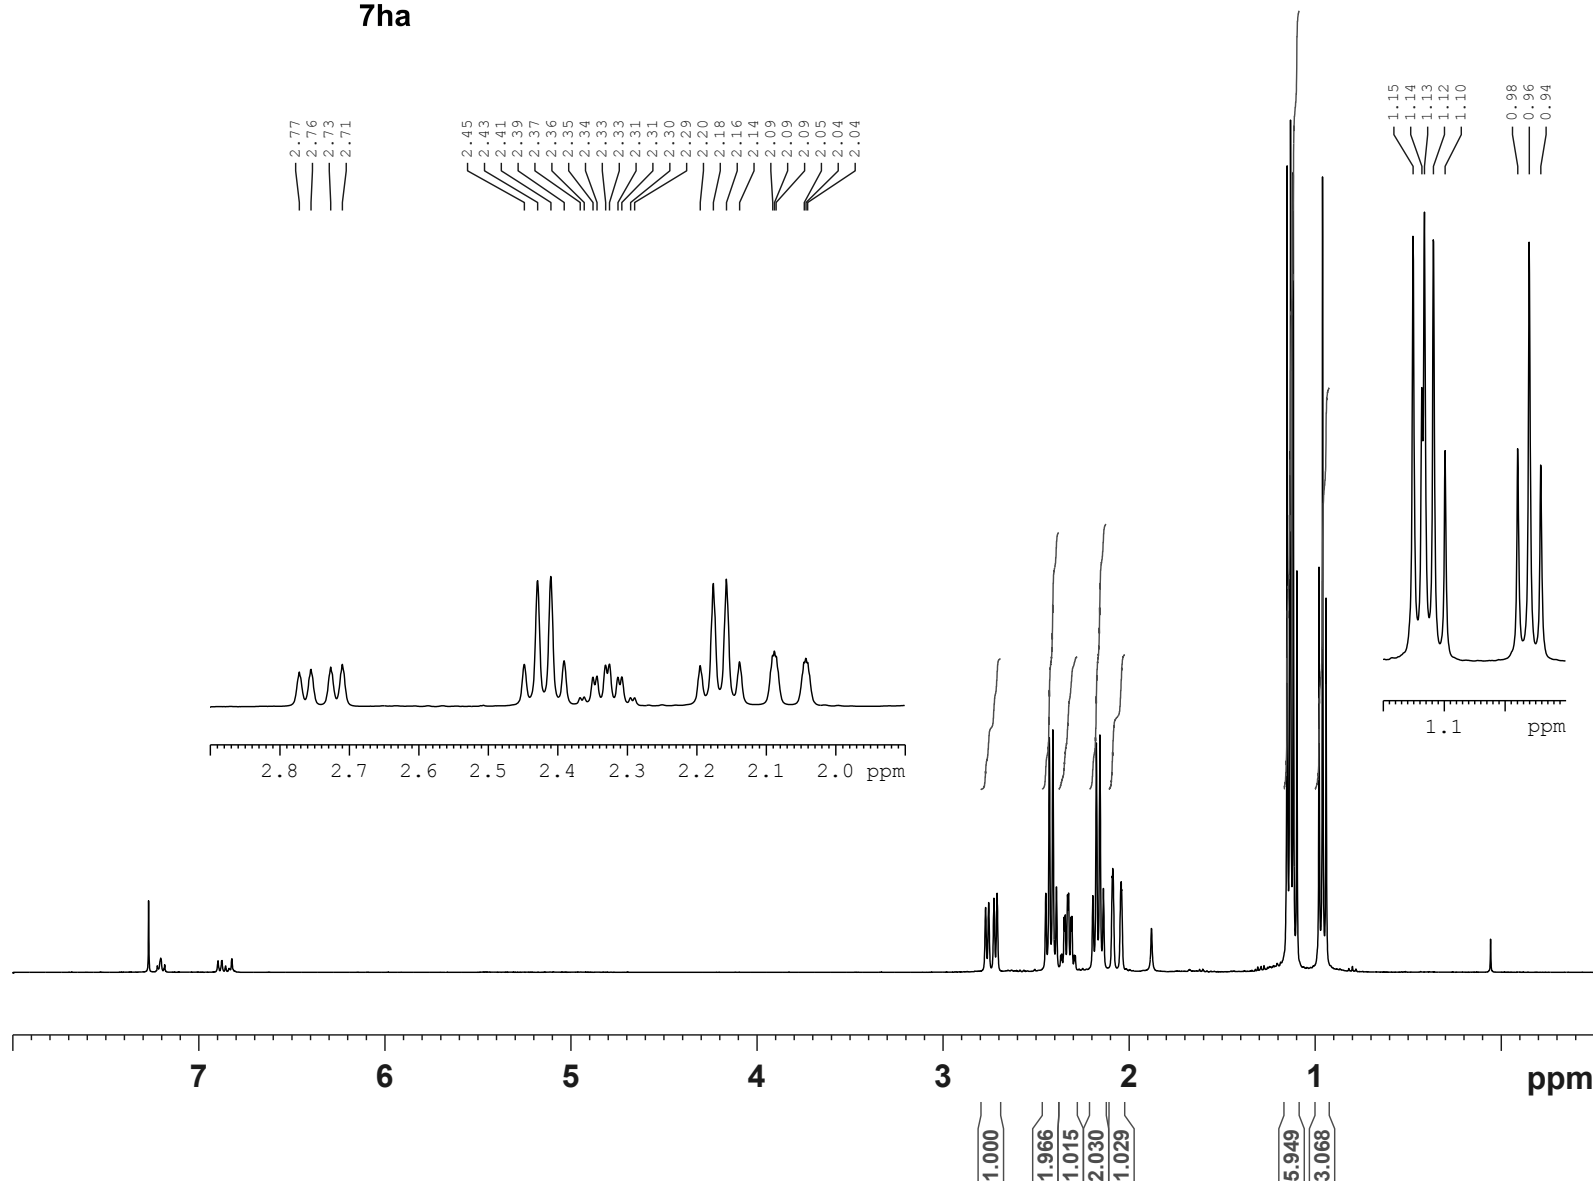

PhMMA + 3-Hex

212.38

172.87

139.93

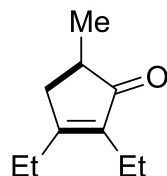

7ha

77.38  
77.06  
76.74

39.50  
37.67

23.94  
16.64  
16.29  
13.36  
12.09

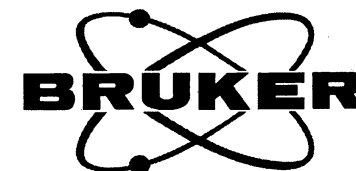

Current Data Parameters  
NAME 15\_PhMA\_3-hexyne  
EXPNO 13  
PROCNO 1

F2 - Acquisition Parameters  
Date 20100518  
Time 23.35  
INSTRUM spect  
PROBHD 5 mm PABBO BB-  
PULPROG zgpg30  
TD 65536  
SOLVENT CDCl3  
NS 33  
DS 4  
SWH 24038.461 Hz  
FIDRES 0.366798 Hz  
AQ 1.3631988 sec  
RG 203  
DW 20.800 usec  
DE 6.50 usec  
TE 298.1 K  
D1 2.00000000 sec  
D11 0.03000000 sec  
TD0 1

===== CHANNEL f1 =====  
NUC1 13C  
P1 10.00 usec  
PL1 2.20 dB  
PL1W 21.94663811 W  
SFO1 100.6228298 MHz

===== CHANNEL f2 =====  
CPDPRG2 waltz16  
NUC2 1H  
PCPD2 75.00 usec  
PL2 -1.00 dB  
PL12 14.20 dB  
PL13 15.00 dB  
PL2W 13.34481144 W  
PL12W 0.40300688 W  
PL13W 0.33520651 W  
SFO2 400.1316005 MHz

F2 - Processing parameters  
SI 32768  
SF 100.6127690 MHz  
WDW EM  
SSB 0  
LB 1.00 Hz  
GB 0  
PC 1.40

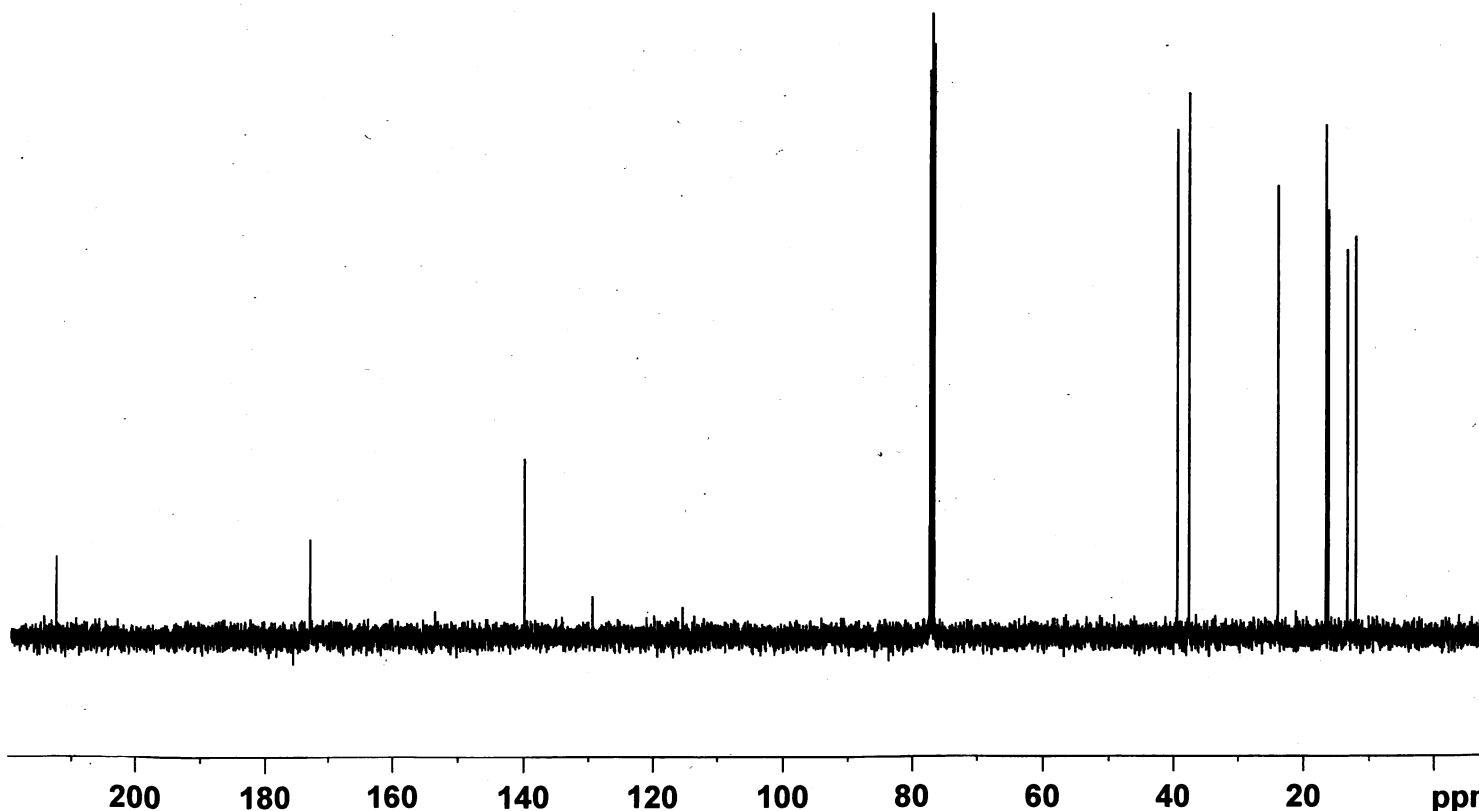

Supplement: Supplementary file 1 [file 4260115]
